# Supplementary material for: Efficient and stereoselective one-pot synthesis of benzo[b]oxazolo[3,4-d][1,4]oxazin-1-ones
Source: PubMed Central journal article supplement — RSC Adv. 2020 Jun 23;10(40):24037–44. doi: 10.1039/d0ra04104a (PMC9055095; doi:10.1039/d0ra04104a), 2020-06-23
Supplement: RA-010-D0RA04104A-s001.pdf [file RA-010-D0RA04104A-s001.pdf]

## Supporting Information

### Efficient and stereoselective one-pot synthesis of benzo[*b*]oxazolo[3,4-*d*][1,4]oxazin-1-ones

Hongyi Zhao, Wenting Zhao, Shihao Cheng, Haijia Lu, Dongfeng Zhang\* and Haihong Huang\*

Beijing Key Laboratory of Active Substance Discovery and Druggability Evaluation, Institute of Materia Medica, Peking Union Medical College and Chinese Academy of Medical Sciences, 1 Xian Nong Tan Street, Beijing 100050, China.

Chinese Academy of Medical Sciences Key Laboratory of Anti-DR TB Innovative Drug Research, Institute of Materia Medica, Peking Union Medical College and Chinese Academy of Medical Sciences, 1 Xian Nong Tan Street, Beijing 100050, P. R. China

Email: [zdf@imm.ac.cn](mailto:zdf@imm.ac.cn), [joyce@imm.ac.cn](mailto:joyce@imm.ac.cn)

## Table of Contents

|                                                              |            |
|--------------------------------------------------------------|------------|
| <b>Preparation of 8a-8r.....</b>                             | <b>S2</b>  |
| <b>Preparation of 9a-9d.....</b>                             | <b>S8</b>  |
| <b>Preparation of (±)-9a and (±)-9c.....</b>                 | <b>S10</b> |
| <b>Preparation of 10a and 10b.....</b>                       | <b>S11</b> |
| <b>Preparation of (±)-11aa and (±)-11c.....</b>              | <b>S12</b> |
| <b><sup>1</sup>H NMR and <sup>13</sup>C NMR Spectra.....</b> | <b>S14</b> |
| <b>Chiral HPLC chromatograms.....</b>                        | <b>S53</b> |
| <b>References.....</b>                                       | <b>S76</b> |

### Preparation of 8a-8r

#### **tert-Butyl (2-hydroxyphenyl)carbamate (8a)**

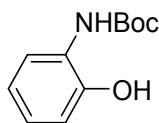

To a suspension of 2-aminophenol (7.63 g, 70 mmol) in DCM (80 mL) was added a solution of Boc<sub>2</sub>O (15.3 g, 70 mmol) in DCM (20 mL). The mixture was stirred at room temperature overnight. After concentration, the residue was purified by column chromatography (10-20% EtOAc in PE) to give **8a** (13.8 g, 95%) as an off-white solid. <sup>1</sup>H NMR (400 MHz, CDCl<sub>3</sub>) δ: 8.12 (brs, 1 H), 7.10-7.01 (m, 2 H), 6.97 (dd, *J* = 1.2, 8.4 Hz, 1 H), 6.89-6.81 (m, 1 H), 6.63 (brs, 1 H), 1.53 (s, 9 H). Its analytical data are identical to those previously reported.<sup>1</sup>

#### **Benzyl (2-hydroxyphenyl)carbamate (8b)**

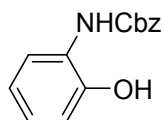

A mixture of 2-aminophenol (578 mg, 5.3 mmol), sodium bicarbonate (580 mg, 6.9 mmol), tetrahydrofuran (9 mL) and water (3 mL) was cooled in an ice bath under the protection of argon. A solution of benzyl chloroformate (0.73 mL, 5.3 mmol) in tetrahydrofuran (3 mL) was added dropwise to the above reaction mixture. After completion monitored by TLC, dichloromethane was added, and the organic phase was washed with water and brine, dried over anhydrous Na<sub>2</sub>SO<sub>4</sub>, filtered and concentrated. The crude product was purified by column chromatography (10-20% EtOAc in PE) to give **8b** (1.26 g, 98% yield). Off-white solid. <sup>1</sup>H NMR (400 MHz, DMSO-*d*<sub>6</sub>) δ: 9.67 (s, 1 H), 8.40 (s, 1 H), 7.55 (d, *J* = 7.6 Hz, 1 H), 7.45-7.28 (m, 5 H), 6.96-6.72 (m, 3 H), 5.13 (s, 2 H). HR-MS (ESI): *m/z* [M+H]<sup>+</sup> calcd for C<sub>14</sub>H<sub>14</sub>NO<sub>3</sub>: 244.0968; found: 244.0968.

#### **Benzyl (2-hydroxy-5-methoxyphenyl)carbamate (8c)**

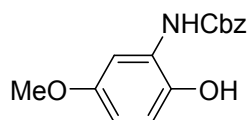

Compound **8c** was prepared from 2-amino-4-methoxyphenol following the preparation

method of **8b**. Pink solid (78% yield). Flash column chromatography was performed eluting with DCM.  $^1\text{H}$  NMR (400 MHz,  $\text{DMSO}-d_6$ )  $\delta$ : 9.21 (s, 1 H), 8.36 (s, 1 H), 7.48-7.21 (m, 6 H), 6.74 (d,  $J = 8.8$  Hz, 1 H), 6.49 (dd,  $J = 2.8, 8.8$  Hz, 1 H), 5.14 (s, 2 H), 3.65 (s, 3 H). HR-MS (ESI):  $m/z$   $[\text{M}+\text{H}]^+$  calcd for  $\text{C}_{15}\text{H}_{16}\text{NO}_4$ : 274.1074; found: 274.1070.

**Benzyl (2-hydroxy-4-methoxyphenyl)carbamate (8d)**

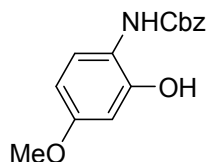

A mixture of 5-methoxy-2-nitrophenol (1 g, 5.9 mmol), Raney nickel (0.3 g) and tetrahydrofuran (10 mL) was hydrogenated at 20-50 psi for 3 hours. The reaction mixture was filtered into a flask containing sodium bicarbonate (0.64 g, 7.67 mmol) and water (8 mL) under ice bath, protected by argon. Benzyl chloroformate (0.83 mL, 5.9 mmol) was added dropwise, and the mixture was stirred for 30 minutes. Ethyl acetate was added, and then the organic phase was washed with water and brine, dried over anhydrous sodium sulfate, filtered and concentrated to give a yellow solid. The crude product was stirred with hexane and filtered to give **8d** (1.2 g, 75%) as a yellow solid.  $^1\text{H}$  NMR (400 MHz,  $\text{DMSO}-d_6$ )  $\delta$ : 9.60 (s, 1 H), 8.33 (s, 1 H), 7.46-7.18 (m, 6 H), 6.41 (d,  $J = 2.4$  Hz, 1 H), 6.35 (dd,  $J = 2.8, 8.8$  Hz, 1 H), 5.09 (s, 2 H), 3.67 (s, 3 H). MS (ESI)  $m/z$ : 272 ( $[\text{M}-\text{H}]^-$ ).

**Benzyl (2-hydroxy-5-methylphenyl)carbamate (8e)**

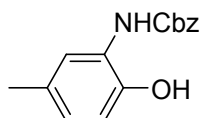

Compound **8e** was prepared from 2-amino-4-methylphenol following the preparation method of **8b**. Yellow solid (87% yield). Flash column chromatography was performed eluting with 15% EtOAc in PE.  $^1\text{H}$  NMR (400 MHz,  $\text{DMSO}-d_6$ )  $\delta$ : 9.40 (s, 1 H), 8.33 (s, 1 H), 7.49-7.27 (m, 6 H), 6.71 (d,  $J = 0.8$  Hz, 2 H), 5.13 (s, 2 H), 2.18 (s, 3 H). HR-MS (ESI):  $m/z$   $[\text{M}+\text{H}]^+$  calcd for  $\text{C}_{15}\text{H}_{16}\text{NO}_3$ : 258.1125; found: 258.1123.

**Benzyl (2-hydroxy-4-methylphenyl)carbamate (8f)**

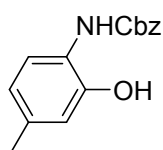

Compound **8f** was prepared from 2-amino-5-methylphenol following the preparation method

of **8b**. Pink solid (94% yield). Flash column chromatography was performed eluting with 15% EtOAc in PE. <sup>1</sup>H NMR (500 MHz, DMSO-*d*<sub>6</sub>) δ: 9.51 (s, 1 H), 8.33 (s, 1 H), 7.51-7.25 (m, 6 H), 6.65 (s, 1 H), 6.57 (d, *J* = 8.0 Hz, 1 H), 5.11 (s, 2 H), 2.18 (s, 3 H). HR-MS (ESI): *m/z* [M+H]<sup>+</sup> calcd for C<sub>15</sub>H<sub>16</sub>NO<sub>3</sub>: 258.1125; found: 258.1124.

**Benzyl (2-bromo-6-hydroxyphenyl)carbamate (8g)**

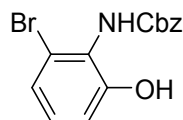

To a mixture of 2-amino-3-bromophenol (1 g, 5.3 mmol) and calcium carbonate powder (330 mg, 3.3 mmol) in 1,4-dioxane (6 mL) was added benzyl chloroformate (0.73 mL, 5.3 mmol). The reaction mixture was heated at 70°C. After completion monitored by TLC, water was added. The resulting mixture was extracted with ethyl acetate, and then the organic phase was washed with brine, dried over anhydrous Na<sub>2</sub>SO<sub>4</sub>, filtered and concentrated. The crude product was purified by column chromatography (10% EtOAc in PE) to give **8g** (1.45 g, 85%). Brown solid. <sup>1</sup>H NMR (400 MHz, DMSO-*d*<sub>6</sub>) δ: 9.91 (s, 1 H), 8.74 (s, 1 H), 7.49-7.22 (m, 5 H), 7.10-6.97 (m, 2 H), 6.87 (dd, *J* = 1.6, 7.6 Hz, 1 H), 5.09 (s, 2 H). HR-MS (ESI): *m/z* [M+H]<sup>+</sup> calcd for C<sub>14</sub>H<sub>13</sub>BrNO<sub>3</sub>: 322.0073; found: 322.0072.

**Benzyl (5-bromo-2-hydroxyphenyl)carbamate (8h)**

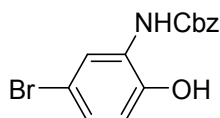

Compound **8h** was prepared from 2-amino-4-bromophenol following the preparation method of **8b**. Red solid (84% yield). Flash column chromatography was performed eluting with 15% EtOAc in PE. <sup>1</sup>H NMR (400 MHz, DMSO-*d*<sub>6</sub>) δ: 10.10 (s, 1 H), 8.61 (s, 1 H), 7.80 (s, 1 H), 7.53-7.25 (m, 5 H), 7.07 (dd, *J* = 2.4, 8.4 Hz, 1 H), 6.79 (d, *J* = 8.4 Hz, 1 H), 5.15 (s, 2 H). HR-MS (ESI): *m/z* [M+H]<sup>+</sup> calcd for C<sub>14</sub>H<sub>13</sub>BrNO<sub>3</sub>: 322.0073; found: 322.0072.

**Benzyl (4-bromo-2-hydroxyphenyl)carbamate (8i)**

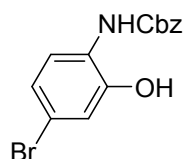

Compound **8i** was prepared from 2-amino-5-bromophenol following the preparation method

of **8b**. Yellow solid (98% yield). Flash column chromatography was performed eluting with 10-20% EtOAc in PE.  $^1\text{H}$  NMR (400 MHz,  $\text{DMSO-}d_6$ )  $\delta$ : 10.24 (s, 1 H), 8.53 (s, 1 H), 7.52 (d,  $J = 8.4$  Hz, 1 H), 7.46-7.27 (m, 5 H), 7.00-6.91 (m, 2 H), 5.13 (s, 2 H). HR-MS (ESI):  $m/z$   $[\text{M}+\text{H}]^+$  calcd for  $\text{C}_{14}\text{H}_{13}\text{BrNO}_3$ : 322.0073; found: 322.0072.

**Benzyl (3-bromo-2-hydroxyphenyl)carbamate (8j)**

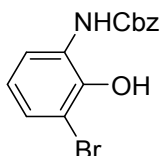

Compound **8j** was prepared from 2-amino-6-bromophenol following the preparation method of **8b**. Pink solid (96% yield). Flash column chromatography was performed eluting with 10-20% EtOAc in PE.  $^1\text{H}$  NMR (400 MHz,  $\text{DMSO-}d_6$ )  $\delta$ : 9.49 (s, 1 H), 8.89 (s, 1 H), 7.59-7.18 (m, 7 H), 6.77 (t,  $J = 8.0$  Hz, 1 H), 5.15 (s, 2 H). HR-MS (ESI):  $m/z$   $[\text{M}+\text{H}]^+$  calcd for  $\text{C}_{14}\text{H}_{13}\text{BrNO}_3$ : 322.0073; found: 322.0071.

**Benzyl (5-fluoro-2-hydroxyphenyl)carbamate (8k)**

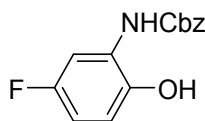

Compound **8k** was prepared from 2-amino-4-fluorophenol following the preparation method of **8b**. Off-white solid (87% yield). Flash column chromatography was performed eluting with 15% EtOAc in PE.  $^1\text{H}$  NMR (400 MHz,  $\text{DMSO-}d_6$ )  $\delta$ : 9.75 (s, 1 H), 8.55 (s, 1 H), 7.51 (dd,  $J = 2.8, 10.8$  Hz, 1 H), 7.47-7.28 (m, 5 H), 6.80 (dd,  $J = 5.6, 9.2$  Hz, 1 H), 6.76-6.67 (m, 1 H), 5.16 (s, 2 H). HR-MS (ESI):  $m/z$   $[\text{M}+\text{H}]^+$  calcd for  $\text{C}_{14}\text{H}_{13}\text{FNO}_3$ : 262.0874; found: 262.0875.

**Benzyl (4-fluoro-2-hydroxyphenyl)carbamate (8l)**

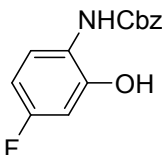

Compound **8l** was prepared from 2-amino-5-fluorophenol following the preparation method of **8b**. Off-white solid (88% yield). Flash column chromatography was performed eluting with 15% EtOAc in PE.  $^1\text{H}$  NMR (400 MHz,  $\text{DMSO-}d_6$ )  $\delta$ : 10.15 (s, 1 H), 8.48 (s, 1 H), 7.53-7.28 (m, 6 H), 6.68-6.54 (m, 2 H), 5.12 (s, 2 H). HR-MS (ESI):  $m/z$   $[\text{M}+\text{H}]^+$  calcd for  $\text{C}_{14}\text{H}_{13}\text{FNO}_3$ : 262.0874; found: 262.0874.

**Benzyl (2,4-dichloro-6-hydroxyphenyl)carbamate (8m)**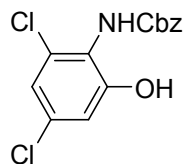

Compound **8m** was prepared from 2-amino-3,5-dichlorophenol following the preparation method of **8b**. Red solid (59% yield). Flash column chromatography was performed eluting with 10% EtOAc in PE.  $^1\text{H}$  NMR (400 MHz,  $\text{DMSO-}d_6$ )  $\delta$ : 9.91 (s, 1 H), 8.99 (s, 1 H), 7.62 (d,  $J = 2.8$  Hz, 1 H), 7.47-7.29 (m, 5 H), 7.23 (d,  $J = 2.8$  Hz, 1 H), 5.15 (s, 2 H). HR-MS (ESI):  $m/z$   $[\text{M}+\text{H}]^+$  calcd for  $\text{C}_{14}\text{H}_{12}\text{Cl}_2\text{NO}_3$ : 312.0189; found: 312.0189.

**Benzyl (4,5-difluoro-2-hydroxyphenyl)carbamate (8n)**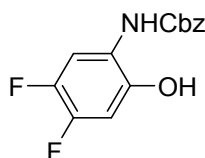

Compound **8n** was prepared from 4,5-difluoro-2-nitrophenol following the preparation method of **8d**. Pale-yellow solid (54% yield). Flash column chromatography was performed eluting with 15% EtOAc in PE.  $^1\text{H}$  NMR (400 MHz,  $\text{DMSO-}d_6$ )  $\delta$ : 10.16 (s, 1 H), 8.66 (s, 1 H), 7.61 (dd,  $J = 9.6, 12.0$  Hz, 1 H), 7.46-7.29 (m, 5 H), 6.81 (dd,  $J = 8.0, 12.0$  Hz, 1 H), 5.14 (s, 2 H). MS (ESI)  $m/z$ : 278 ( $[\text{M}-\text{H}]^-$ ).

**Benzyl (4-bromo-5-fluoro-2-hydroxyphenyl)carbamate (8o)**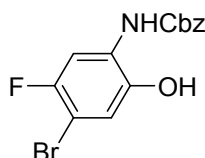

To a mixture of 5-bromo-4-fluoro-2-nitrophenol (1 g, 4.24 mmol) and Zn dust (1.1 g, 17 mmol) in DCM (20 mL) was added AcOH (1.2 mL, 34 mmol). The reaction mixture was stirred at room temperature for 4 h. After filtration and concentration in vacuo, the brown residue was used directly without further purification. Then compound **8o** (138 mg, 10% yield) was prepared according to the preparation method of **8g**. Pale-yellow solid. Flash column chromatography was performed eluting with 15% EtOAc in PE.  $^1\text{H}$  NMR (400 MHz,  $\text{DMSO-}d_6$ )  $\delta$ : 10.22 (s, 1 H), 8.74 (s, 1 H), 7.69 (d,  $J = 10.4$  Hz, 1 H), 7.47-7.29 (m, 5 H), 7.02 (d,  $J = 6.8$  Hz, 1 H), 5.16 (s, 2 H). MS (ESI)  $m/z$ : 338 ( $[\text{M}-\text{H}]^-$ ).

**Benzyl (2-hydroxy-5-nitrophenyl)carbamate (8p)**

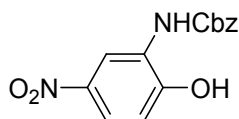

Compound **8p** was prepared from 2-amino-4-nitrophenol following the preparation method of **8g**. Yellow solid (94% yield). The desired product was obtained by triturating with hexane.  $^1\text{H}$  NMR (400 MHz, DMSO- $d_6$ )  $\delta$ : 11.53 (s, 1 H), 8.92 (s, 1 H), 8.64 (d,  $J$  = 2.8 Hz, 1 H), 7.89 (dd,  $J$  = 2.8, 8.8 Hz, 1 H), 7.48-7.30 (m, 5 H), 7.00 (d,  $J$  = 8.8 Hz, 1 H), 5.19 (s, 2 H). MS (ESI)  $m/z$ : 287 ( $[\text{M}-\text{H}]^-$ ).

**Benzyl (2-hydroxy-4-nitrophenyl)carbamate (8q)**

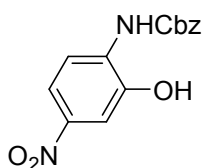

Compound **8q** was prepared from 2-amino-5-nitrophenol following the preparation method of **8g**. Yellow solid (93% yield). The desired product was obtained by triturating with hexane.  $^1\text{H}$  NMR (400 MHz, DMSO- $d_6$ )  $\delta$ : 10.96 (s, 1 H), 8.97 (s, 1 H), 8.03 (d,  $J$  = 9.2 Hz, 1 H), 7.75 (dd,  $J$  = 2.8, 9.2 Hz, 1 H), 7.64 (d,  $J$  = 2.4 Hz, 1 H), 7.48-7.30 (m, 5 H), 5.20 (s, 2 H). HR-MS (ESI):  $m/z$   $[\text{M}+\text{Na}]^+$  calcd for  $\text{C}_{14}\text{H}_{13}\text{N}_2\text{O}_5$ : 289.0819; found: 289.0828.

**Benzyl (2-hydroxy-4-(3-oxomorpholino)phenyl)carbamate (8r)**

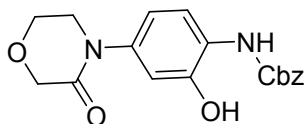

To a cooled solution of 2,4-difluoro-1-nitrobenzene (6.4 g, 40 mmol) in anhydrous toluene (60 mL) was added *t*-BuOK (4.5 g, 22 mmol) in portions. The reaction mixture was stirred for 2 h. Water was added, and the organic layer was washed with water and brine, dried over anhydrous  $\text{Na}_2\text{SO}_4$  and concentrated in vacuum. The brown residue was purified by column chromatography (1-2% EtOAc in PE) to give 2-(*tert*-butoxy)-4-fluoro-1-nitrobenzene (7 g, 82%) as a yellow oil.  $^1\text{H}$  NMR (400 MHz,  $\text{CDCl}_3$ )  $\delta$ : 7.80 (dd,  $J$  = 6.0, 8.8 Hz, 1 H), 6.92 (dd,  $J$  = 2.4, 10.0 Hz, 1 H), 6.87-6.78 (m, 1 H), 1.46 (s, 9 H). Its analytical data are identical with those previously reported.<sup>2,3</sup>

To a cooled mixture of morpholin-3-one (1.7 g, 16.9 mmol) and anhydrous THF (30 mL) was added NaH (60%, 676 mg, 16.9 mmol) in portions. After stirring for 30 min, a solution

of 2-(*tert*-butoxy)-4-fluoro-1-nitrobenzene (3 g, 14.1 mmol) in THF (3 mL) was added and followed by DMSO (15 mL). The mixture was heated at 60°C for 4.5 h and cooled to room temperature. Water (15 mL) and EtOAc (30 mL) were added. The organic layer was separated and washed with brine, dried over anhydrous Na<sub>2</sub>SO<sub>4</sub> and concentrated. The residue was purified by column chromatography (20-50% EtOAc in PE) to give 4-(3-(*tert*-butoxy)-4-nitrophenyl)morpholin-3-one (1.9 g, 46%) as a yellow solid. <sup>1</sup>H NMR (400 MHz, CDCl<sub>3</sub>) δ: 7.80 (d, *J* = 8.8 Hz, 1 H), 7.43 (d, *J* = 2.4 Hz, 1 H), 7.10 (dd, *J* = 2.0, 8.8 Hz, 1 H), 4.36 (s, 2 H), 4.06 (dd, *J* = 4.8, 6.4 Hz, 2 H), 3.82 (dd, *J* = 3.6, 5.2 Hz, 2 H), 1.45 (s, 9 H). HR-MS (ESI): *m/z* [M+H]<sup>+</sup> calcd for C<sub>14</sub>H<sub>19</sub>N<sub>2</sub>O<sub>5</sub>: 295.1288; found: 295.1299. Its analytical data are identical with those previously reported.<sup>2</sup>

To a solution of 4-(3-(*tert*-butoxy)-4-nitrophenyl)morpholin-3-one (1.6 g, 5.4 mmol) in THF (10 mL) was added concentrated hydrochloric acid (5 mL). The mixture was stirred at room temperature for 1 h. EtOH was added to the reaction mixture. The resulting solid was filtered, the filter cake was washed with EtOH, and dried to give 4-(3-hydroxy-4-nitrophenyl)morpholin-3-one (1.05 g, 82%) as a yellow solid. <sup>1</sup>H NMR (400 MHz, DMSO-*d*<sub>6</sub>) δ: 11.06 (s, 1 H), 7.96 (d, *J* = 9.2 Hz, 1 H), 7.31 (d, *J* = 2.4 Hz, 1 H), 7.11 (dd, *J* = 2.4, 9.2 Hz, 1 H), 4.25 (s, 2 H), 3.98 (dd, *J* = 4.8, 6.8 Hz, 2 H), 3.79 (dd, *J* = 3.6, 5.2 Hz, 2 H). HR-MS (ESI): *m/z* [M+H]<sup>+</sup> calcd for C<sub>10</sub>H<sub>11</sub>N<sub>2</sub>O<sub>5</sub>: 239.0662; found: 239.0674. Its analytical data are identical with those previously reported.<sup>2</sup>

A mixture of 4-(3-hydroxy-4-nitrophenyl)morpholin-3-one (1.25 g, 5.25 mmol), Raney nickel (0.5 g) and tetrahydrofuran (30 mL) was hydrogenated at 20-50 psi for 3.5 h. The reaction mixture was filtered into a flask containing sodium bicarbonate (0.82 g, 10.5 mmol) and water (20 mL) under ice bath, protected by argon. Benzyl chloroformate (0.75 mL, 5.25 mmol) was added dropwise. The mixture was stirred for 2 h and filtered. The filtrate was concentrated to give a solid. EtOH (70%, 30 mL) was added to give a slurry which was filtered, and dried to afford **8r** (1.38 g, 77%) as a pink solid. <sup>1</sup>H NMR (400 MHz, DMSO-*d*<sub>6</sub>) δ: 9.89 (s, 1 H), 8.50 (s, 1 H), 7.54 (d, *J* = 8.4 Hz, 1 H), 7.48-7.29 (m, 5 H), 6.89 (d, *J* = 2.4 Hz, 1 H), 6.77 (dd, *J* = 2.4, 8.4 Hz, 1 H), 5.14 (s, 2 H), 4.17 (s, 2 H), 3.94 (dd, *J* = 4.8, 6.4 Hz, 2 H), 3.66 (t, *J* = 5.2 Hz, 2 H). HR-MS (ESI): *m/z* [M+H]<sup>+</sup> calcd for C<sub>18</sub>H<sub>19</sub>N<sub>2</sub>O<sub>5</sub>: 343.1288; found: 343.1301. Its analytical data are identical with those previously reported.<sup>2</sup>

### ***Preparation of 9a-9d***

**(2*R*,3*S*)-3-((Trityloxy)methyl)oxiran-2-yl)methanol (9a)**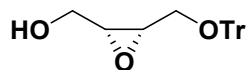

To a four-necked flask were added 4Å molecular sieve (12 g) and anhydrous dichloromethane (330 mL). The mixture was cooled to -40°C under the protection of argon. *D*-(-)-diethyl tartrate (13.6 mL, 79.2 mmol) was added, followed by titanium tetrakisopropanolate (18.8 mL, 63.4 mmol), and the reaction mixture turned to yellow. After stirring for 0.5 h, a solution of (*Z*)-4-(trityloxy)but-2-en-1-ol (26.1 g, 79.2 mmol) in dichloromethane (120 mL) was added to the mixture and stirred for 0.5 h. A solution of *tert*-butyl hydroperoxide in toluene (3.8 M, 50 mL, 190 mmol) was added and stirred overnight at -20°C. After the reaction completed monitored by TLC, tartaric acid solution (10%, 200 mL) containing FeSO<sub>4</sub>·7H<sub>2</sub>O (30 g) was added and stirred at 0°C for 1 h before layering. The organic layer was separated, and the water layer was extracted with dichloromethane for twice. The organic phase was combined and washed with saturated brine for twice, filtered, and evaporated to give a solid, which was stirred in *n*-hexane and filtered, followed by recrystallizing with petroleum ether/ethyl acetate to obtain **9a** (15 g, 58%) as an off-white solid. The corresponding alcohol was analyzed by Chiral HPLC (OD-H, 5 μm, 4.6 mm×250mmL; eluent: hexane/ethanol, 90/10; flow rate: 1 mL/min; λ = 215 nm; T = 20°C): *t<sub>R</sub>* = 6.46 min (96.49%), 12.58 min (3.51%). The enantiomeric purity of **9a** was determined to be 93.0% *ee*. [α]<sub>D</sub><sup>24</sup> = +31.9 (c = 1, CHCl<sub>3</sub>). <sup>1</sup>H NMR (400 MHz, CDCl<sub>3</sub>) δ: 7.47-7.19 (m, 15 H), 3.63-3.50 (m, 3 H), 3.29-3.17 (m, 2 H), 3.07 (dd, *J* = 5.6, 10.4 Hz, 1 H), 1.90 (brs, 1 H). HR-MS (ESI): *m/z* [M+Na]<sup>+</sup> calcd for C<sub>23</sub>H<sub>22</sub>NaO<sub>3</sub>: 369.1461, found: 369.1427.

**(2*S*,3*R*)-3-((Trityloxy)methyl)oxiran-2-yl)methanol (9b)**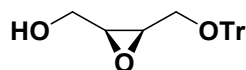

Compound **9b** (6 g, 51%) was prepared from (*Z*)-4-(trityloxy)but-2-en-1-ol in the same manner as described for **9a** by replacing *D*-(-)-diethyl tartrate with *L*-(+)-diethyl tartrate. The enantiomeric purity of **9b** was determined to be 96.8% *ee*. [α]<sub>D</sub><sup>24</sup> = -31.1 (c = 1, CHCl<sub>3</sub>). <sup>1</sup>H NMR (400 MHz, CDCl<sub>3</sub>) δ: 7.49-7.20 (m, 15 H), 3.65-3.50 (m, 3 H), 3.28-3.17 (m, 2 H), 3.06 (dd, *J* = 5.6, 10.8 Hz, 1 H), 1.85 (t, *J* = 6.4 Hz, 1 H). HR-MS (ESI): *m/z* [M+Na]<sup>+</sup> calcd for C<sub>23</sub>H<sub>22</sub>NaO<sub>3</sub>: 369.1461, found: 369.1448.

**((2*S*,3*S*)-3-((Trityloxy)methyl)oxiran-2-yl)methanol (9c)**

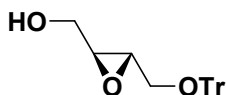

Compound **9c** (3.1 g, 98%) was prepared from (*E*)-4-(trityloxy)but-2-en-1-ol in the same manner as described for **9a** by replacing *D*-(-)-diethyl tartrate with *L*-(+)-diethyl tartrate. The corresponding alcohol was analyzed by Chiral HPLC (OZ-H, 5  $\mu$ m, 4.6 mm $\times$ 250mmL; eluent: hexane/ isopropanol, 97/3; flow rate: 1 mL/min;  $\lambda$  = 220 nm; T = 20°C):  $t_R$  = 18.62 min (1.72%), 21.26 min (98.28%). The enantiomeric purity of **9c** was determined to be 96.6% *ee*.  $[\alpha]_D^{25}$  = -10.5 ( $c$  = 1, EtOAc).  $^1\text{H}$  NMR (400 MHz, DMSO- $d_6$ )  $\delta$ : 7.45-7.22 (m, 15 H), 4.83 (t,  $J$  = 6.0 Hz, 1 H), 3.64-3.54 (m, 1 H), 3.42-3.33 (m, 1 H), 3.27 (dd,  $J$  = 2.0, 10.8 Hz, 1 H), 3.13-3.04 (m, 1 H), 3.00-2.94 (m, 1 H), 2.94-2.87 (m, 1 H). HR-MS (ESI):  $m/z$   $[\text{M}+\text{Na}]^+$  calcd for  $\text{C}_{23}\text{H}_{22}\text{NaO}_3$ : 369.1461, found: 369.1476.

**((2*R*,3*R*)-3-((Trityloxy)methyl)oxiran-2-yl)methanol (9d)**

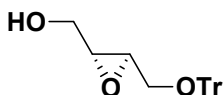

Compound **9d** (2.7 g, 87%) was prepared from (*E*)-4-(trityloxy)but-2-en-1-ol (3 g, 9.1 mmol) in the same manner as described for **9a**. The enantiomeric purity of **9d** was determined to be 98.1% *ee*.  $[\alpha]_D^{25}$  = +9.4 ( $c$  = 1, EtOAc).  $^1\text{H}$  NMR (400 MHz, DMSO- $d_6$ )  $\delta$ : 7.43-7.21 (m, 15 H), 4.82 (t,  $J$  = 6.0 Hz, 1 H), 3.64-3.53 (m, 1 H), 3.41-3.33 (m, 1 H), 3.27 (dd,  $J$  = 2.0, 11.2 Hz, 1 H), 3.12-3.05 (m, 1 H), 3.00-2.94 (m, 1 H), 2.94-2.86 (m, 1 H). HR-MS (ESI):  $m/z$   $[\text{M}+\text{Na}]^+$  calcd for  $\text{C}_{23}\text{H}_{22}\text{NaO}_3$ : 369.1461, found: 369.1460.

**Preparation of ( $\pm$ )-9a and ( $\pm$ )-9c**

**cis-3-((Trityloxy)methyl)oxiran-2-yl)methanol (( $\pm$ )-9a)**

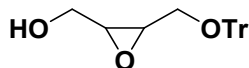

To a solution of (*Z*)-4-(trityloxy)but-2-en-1-ol (10 g, 30.4 mmol) in dichloromethane (80 mL) was added *m*-CPBA (6.4 g, 31.8 mmol). The reaction mixture was stirred overnight. After filtration, the filtrate is washed with saturated sodium bicarbonate solution and brine, dried over anhydrous sodium sulfate, filtered and concentrated. To the residue was added diethyl ether and stirred for 3 h. After filtration, the filter cake was washed with diethyl ether and dried to afford ( $\pm$ )-**9a** (7.3 g, 69%) as a white solid.  $^1\text{H}$  NMR (400 MHz,  $\text{CDCl}_3$ )  $\delta$ : 7.48-7.42 (m, 6 H), 7.35-7.28 (m, 6 H), 7.28-7.20 (m, 3 H), 3.64-3.49 (m, 3 H), 3.29-3.17 (m, 2 H),

3.07 (dd,  $J = 5.6$  Hz, 10.4 Hz, 1 H), 1.87 (brs, 1 H). HR-MS (ESI):  $m/z$   $[M+Na]^+$  calcd for  $C_{23}H_{22}NaO_3$ : 369.1461, found: 369.1445.

***trans*-(3-((Trityloxy)methyl)oxiran-2-yl)methanol ((±)-9c)**

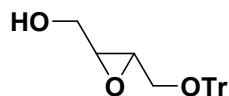

To a solution of (*E*)-4-(trityloxy)but-2-en-1-ol (2.2 g, 6.7 mmol) in dichloromethane (25 mL) was added *m*-CPBA (75%, 1.7 g, 7 mmol) in batches. The reaction mixture was stirred overnight. After filtration, the filtrate is washed with saturated sodium bicarbonate solution and brine, dried over anhydrous sodium sulfate, filtered and concentrated. To the residue was added EtOAc/PE (1/5, 10 mL) and stirred for 2.5 h. After filtration, the filter cake was washed with the mixture solution of EtOAc/PE and dried to afford (±)-9c (1.1 g, 47%) as a white solid.  $^1H$  NMR (400 MHz,  $CDCl_3$ )  $\delta$ : 7.48-7.42 (m, 6 H), 7.34-7.28 (m, 6 H), 7.26-7.21 (m, 3 H), 3.94 (dd,  $J = 2.4$ , 12.8 Hz, 1 H), 3.64 (dd,  $J = 4.0$ , 12.4 Hz, 1 H), 3.38 (dd,  $J = 2.4$ , 10.4 Hz, 1 H), 3.25-3.15 (m, 2 H), 3.12-3.11 (m, 1 H). HR-MS (ESI):  $m/z$   $[M+Na]^+$  calcd for  $C_{23}H_{22}NaO_3$ : 369.1461, found: 369.1455.

***Preparation of 10a and 10b***

To a solution of phenol (1 mmol), alcohol (1.35 mmol),  $PPh_3$  (1.5 mmol) in anhydrous THF (8 mL) at 0°C was added dropwise a solution of coupling agent (1.5 mmol) in anhydrous THF (0.3 mL). The reaction mixture was stirred at 0°C for 30 min. Then, the reaction was allowed to warm to room temperature and monitored by TLC. After the reaction was completed, the reaction mixture was purified by column chromatography to give the desired products 10a or 10b.

***tert*-Butyl(2-(((2*R*,3*S*)-3-((trityloxy)methyl)oxiran-2-yl)methoxy)phenyl)carbamate (10a)**

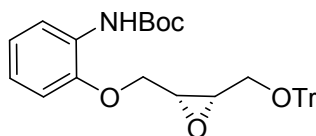

Off-white solid.  $^1H$  NMR (400 MHz,  $CDCl_3$ )  $\delta$ : 8.08 (d,  $J = 7.6$  Hz, 1 H), 7.50-7.17 (m, 15 H), 7.04 (brs, 1 H), 6.99-6.85 (m, 2 H), 6.71 (dd,  $J = 1.2$ , 7.6 Hz, 1 H), 4.15 (dd,  $J = 3.2$ , 11.2 Hz, 1 H), 3.83 (dd,  $J = 6.8$ , 11.2 Hz, 1 H), 3.48 (dd,  $J = 5.6$ , 10.8 Hz, 1 H), 3.45-3.38 (m, 1 H), 3.38-3.29 (m, 1 H), 3.17 (dd,  $J = 5.2$ , 10.8 Hz, 1 H), 1.52 (s, 9 H). HR-MS (ESI):  $m/z$   $[M+Na]^+$  calcd for  $C_{34}H_{35}NNaO_5$ : 560.2407; found: 560.2425.

**Benzyl(2-(((2*R*,3*S*)-3-((trityloxy)methyl)oxiran-2-yl)methoxy)phenyl)carbamate (10b)**

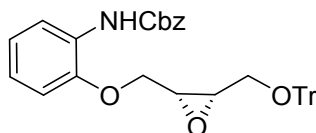

Off-white solid.  $^1\text{H}$  NMR (400 MHz,  $\text{CDCl}_3$ )  $\delta$ : 8.12 (d,  $J = 6.4$  Hz, 1 H), 7.51-7.17 (m, 21 H), 7.03-6.88 (m, 2 H), 6.72 (dd,  $J = 1.6, 7.6$  Hz, 1 H), 5.20 (s, 2 H), 4.12 (dd,  $J = 3.2, 11.2$  Hz, 1 H), 3.84 (dd,  $J = 6.4, 11.2$  Hz, 1 H), 3.47 (dd,  $J = 5.6, 10.4$  Hz, 1 H), 3.41-3.28 (m, 2 H), 3.15 (dd,  $J = 5.2, 10.8$  Hz, 1 H). HR-MS (ESI):  $m/z$   $[\text{M}+\text{Na}]^+$  calcd for  $\text{C}_{37}\text{H}_{33}\text{NNaO}_5$ : 594.2251; found: 594.2264.

**Preparation of ( $\pm$ )-11aa and ( $\pm$ )-11c**

***trans*-3-((Trityloxy)methyl)-3a,4-dihydro-1*H*,3*H*-benzo[*b*]oxazolo[3,4-*d*][1,4]oxazin-1-one (( $\pm$ )-11aa).**

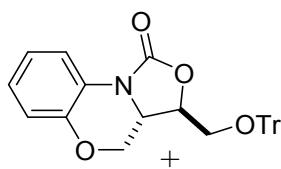

Compound ( $\pm$ )-11aa (342 mg, 74%) was prepared from ( $\pm$ )-9a and 8b using the standard one-pot procedure. White solid. mp: 138-140°C.  $^1\text{H}$  NMR (400 MHz, acetone- $d_6$ )  $\delta$ : 7.96 (dd,  $J = 2.0, 7.6$  Hz, 1 H), 7.54-7.46 (m, 6 H), 7.39-7.32 (m, 6 H), 7.32-7.24 (m, 3 H), 7.08-6.97 (m, 2 H), 6.95-6.91 (m, 1 H), 4.65-4.59 (m, 1 H), 4.53 (dd,  $J = 2.8, 10.0$  Hz, 1 H), 4.15-4.07 (m, 1 H), 4.02 (t,  $J = 10.4$  Hz, 1 H), 3.61 (dd,  $J = 4.0, 10.8$  Hz, 1 H), 3.46 (dd,  $J = 4.4, 10.4$  Hz, 1 H);  $^{13}\text{C}$  NMR (100 MHz, acetone- $d_6$ )  $\delta$ : 154.8, 145.8, 144.7, 129.5, 128.9, 128.2, 125.2, 124.9, 122.1, 120.4, 117.7, 87.8, 75.5, 67.2, 64.9, 53.8; HR-MS (ESI):  $m/z$   $[\text{M}+\text{Na}]^+$  calcd for  $\text{C}_{30}\text{H}_{25}\text{NNaO}_4$ : 486.1676; found: 486.1663.

***cis*-3-((Trityloxy)methyl)-3a,4-dihydro-1*H*,3*H*-benzo[*b*]oxazolo[3,4-*d*][1,4]oxazin-1-one (( $\pm$ )-11c)**

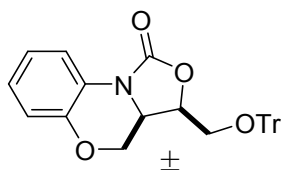

Compound ( $\pm$ )-11c (357 mg, 77%) was prepared from ( $\pm$ )-9c and 8b using the standard one-pot procedure. White solid. mp: 228-230°C.  $^1\text{H}$  NMR (400 MHz, acetone- $d_6$ )  $\delta$ : 8.26 (dd,  $J =$

2.0, 7.6 Hz, 1 H), 7.51-7.39 (m, 6 H), 7.36-7.21 (m, 9 H), 7.09-6.96 (m, 2 H), 6.92 (dd,  $J = 2.0, 7.6$  Hz, 1 H), 5.08-4.97 (m, 1 H), 4.59-4.47 (m, 1 H), 4.40 (dd,  $J = 3.2, 10.4$  Hz, 1 H), 4.11 (t,  $J = 10.0$  Hz, 1 H), 3.60 (dd,  $J = 4.0, 10.8$  Hz, 1 H), 3.09 (dd,  $J = 2.8, 10.8$  Hz, 1 H).  $^{13}\text{C}$  NMR (100 MHz, acetone- $d_6$ )  $\delta$ : 154.3, 145.2, 144.4, 129.4, 128.9, 128.2, 125.6, 124.5, 122.5, 118.5, 117.9, 88.1, 74.6, 64.3, 63.0, 54.2. HR-MS (ESI):  $m/z$   $[\text{M}+\text{Na}]^+$  calcd for  $\text{C}_{30}\text{H}_{25}\text{NNaO}_4$ : 486.1676; found: 486.1664.

# <sup>1</sup>H NMR and <sup>13</sup>C NMR Spectra

## *tert*-Butyl (2-hydroxyphenyl)carbamate (8a)

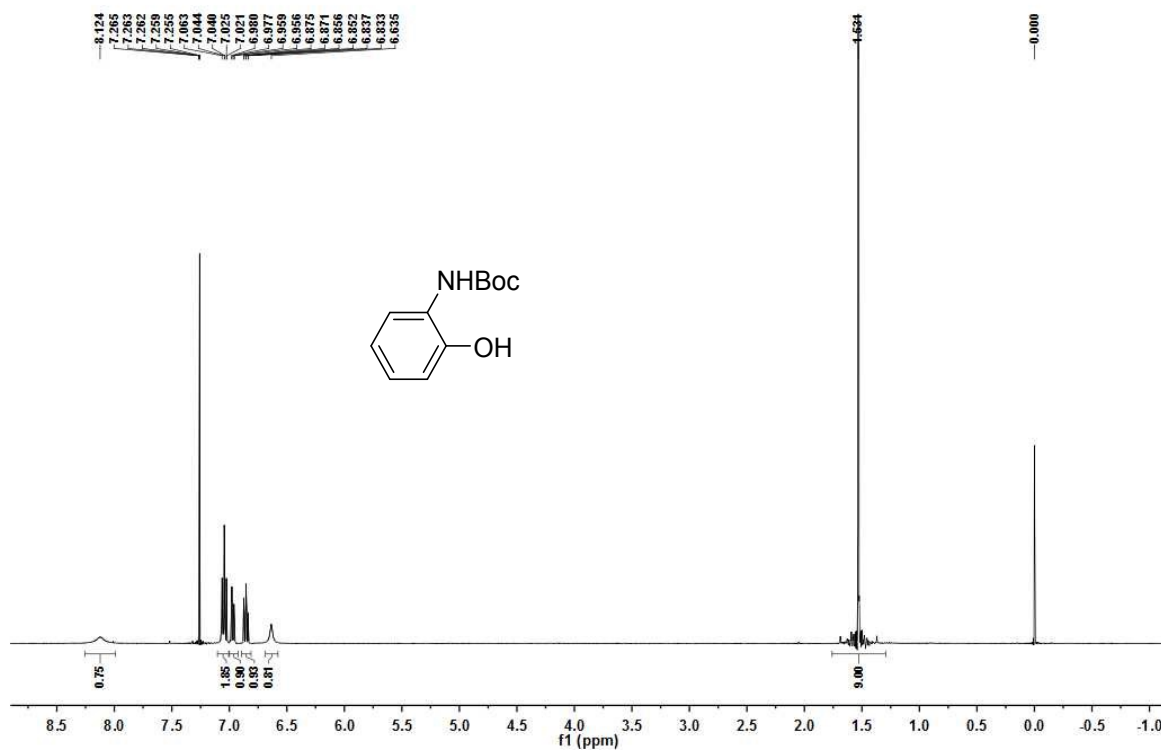

## Benzyl (2-hydroxyphenyl)carbamate (8b)

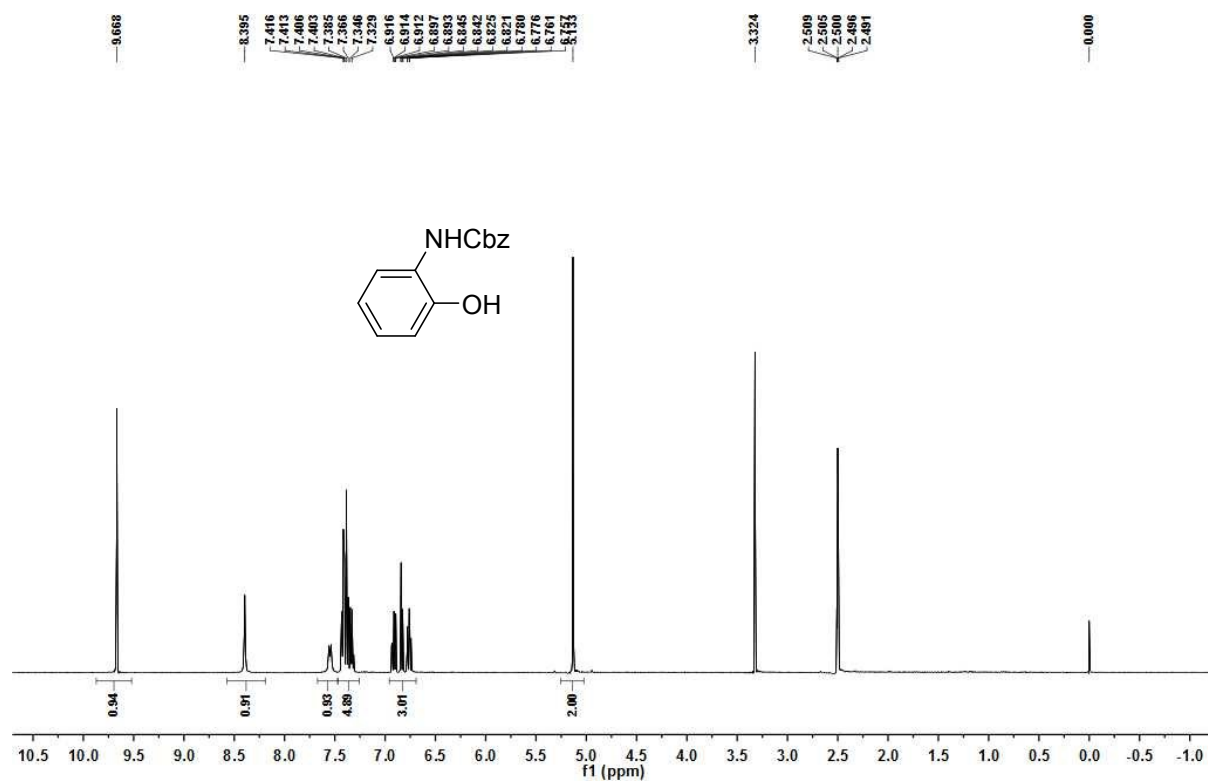

### Benzyl (2-hydroxy-5-methoxyphenyl)carbamate (8c)

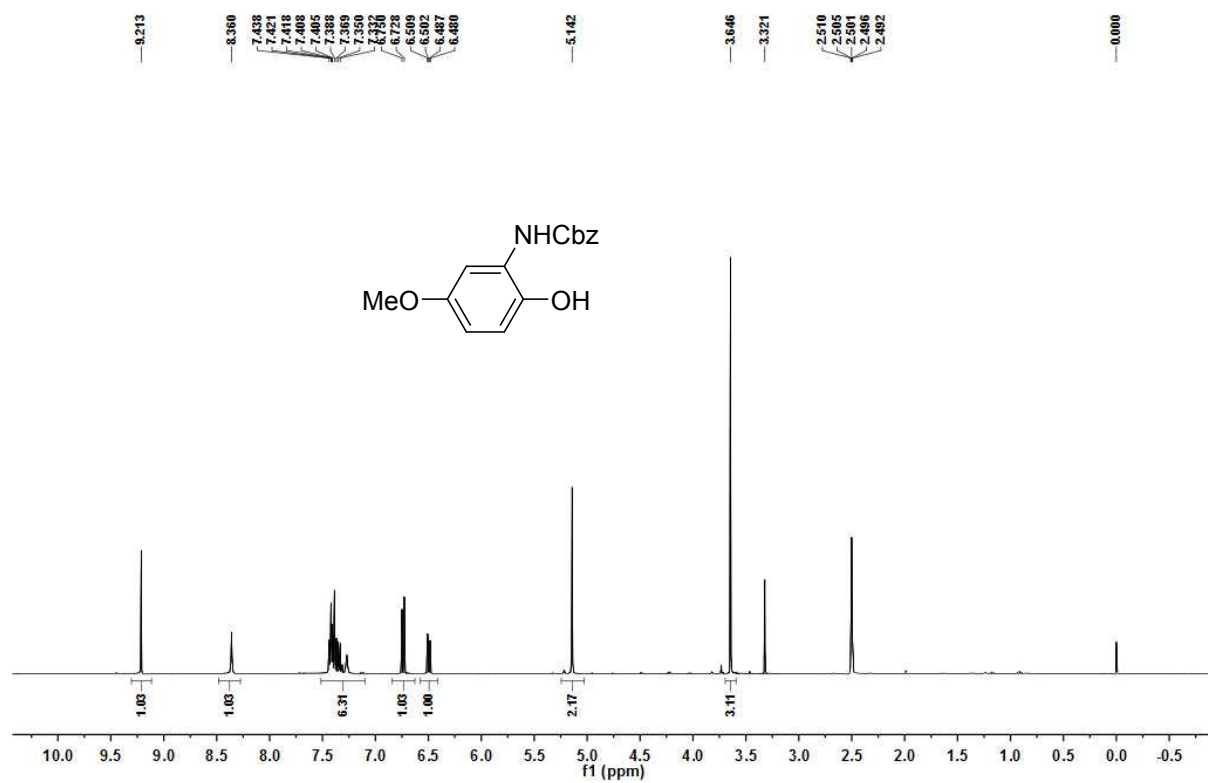

### Benzyl (2-hydroxy-4-methoxyphenyl)carbamate (8d)

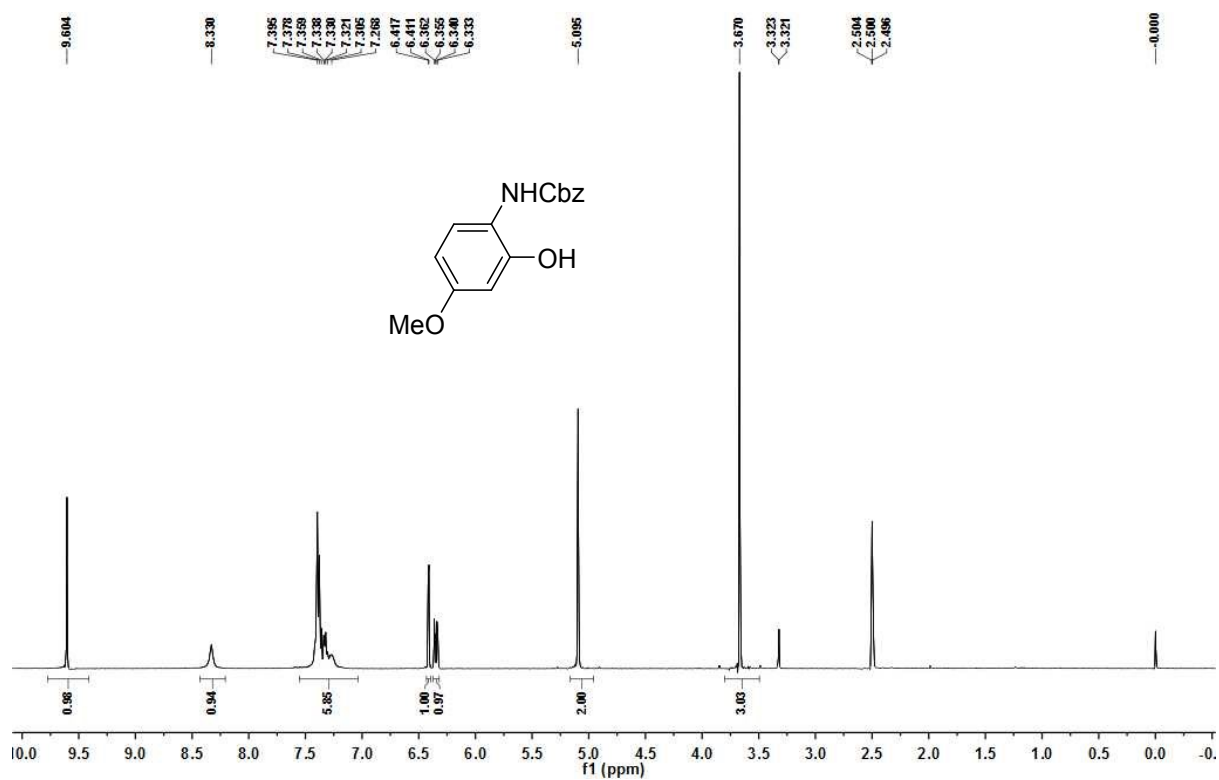

### Benzyl (2-hydroxy-5-methylphenyl)carbamate (8e)

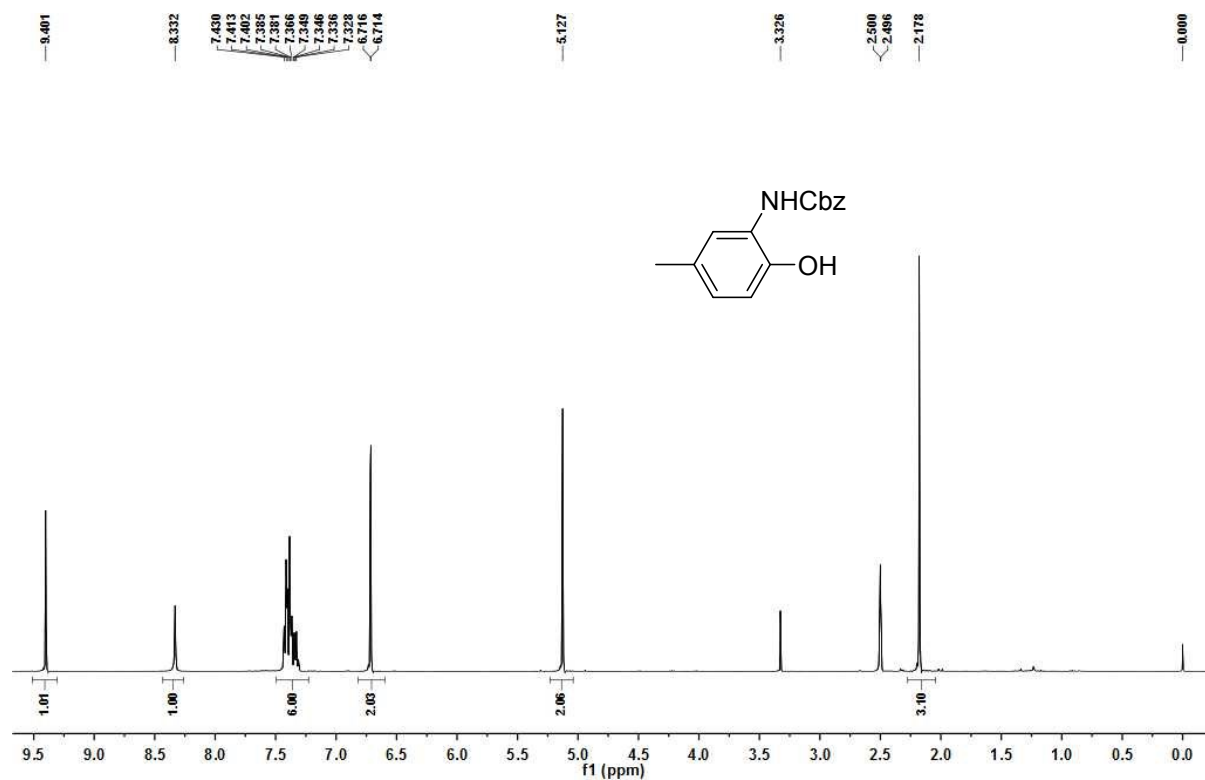

### Benzyl (2-hydroxy-4-methylphenyl)carbamate (8f)

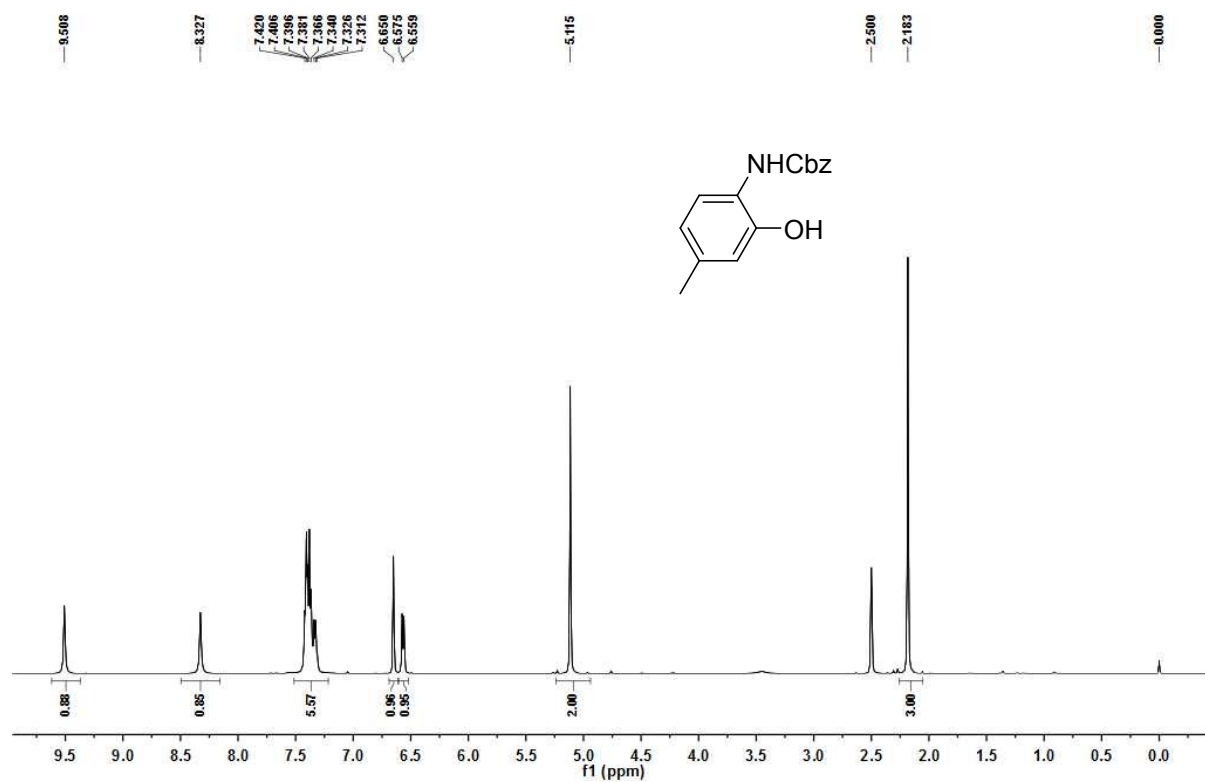

**Benzyl (2-bromo-6-hydroxyphenyl)carbamate (8g)**

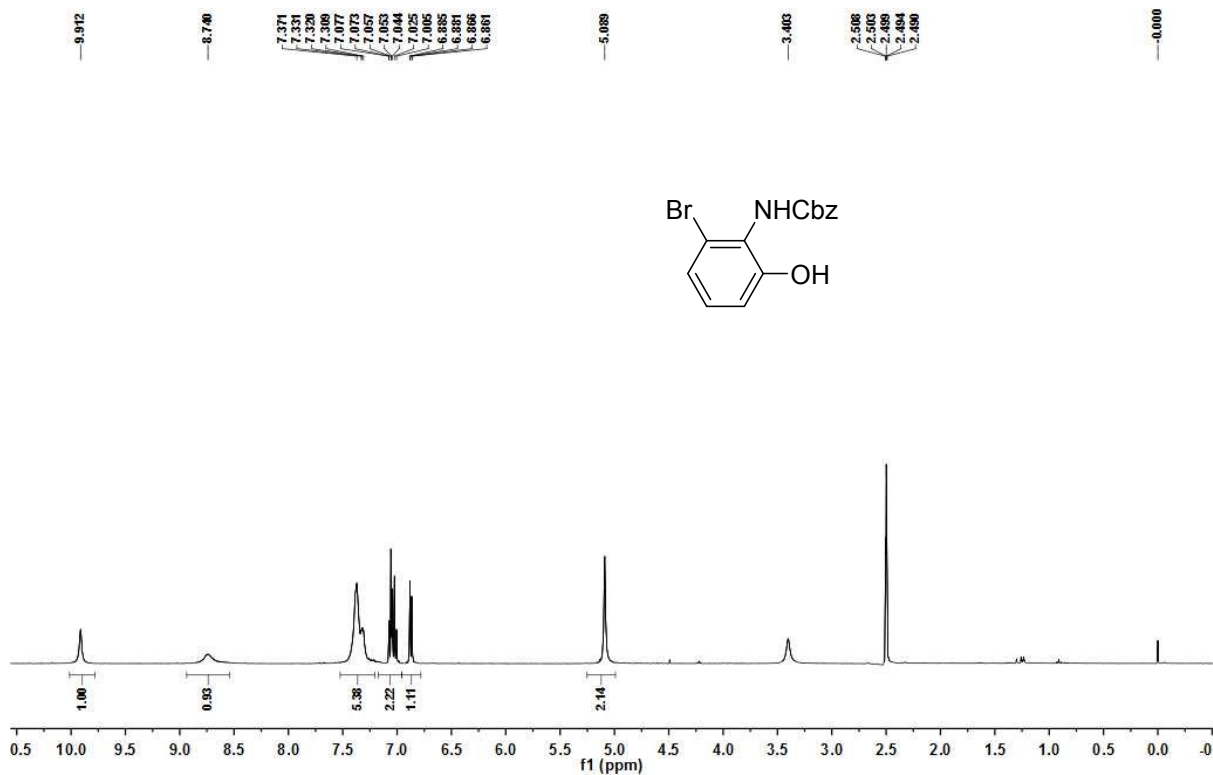

**Benzyl (5-bromo-2-hydroxyphenyl)carbamate (8h)**

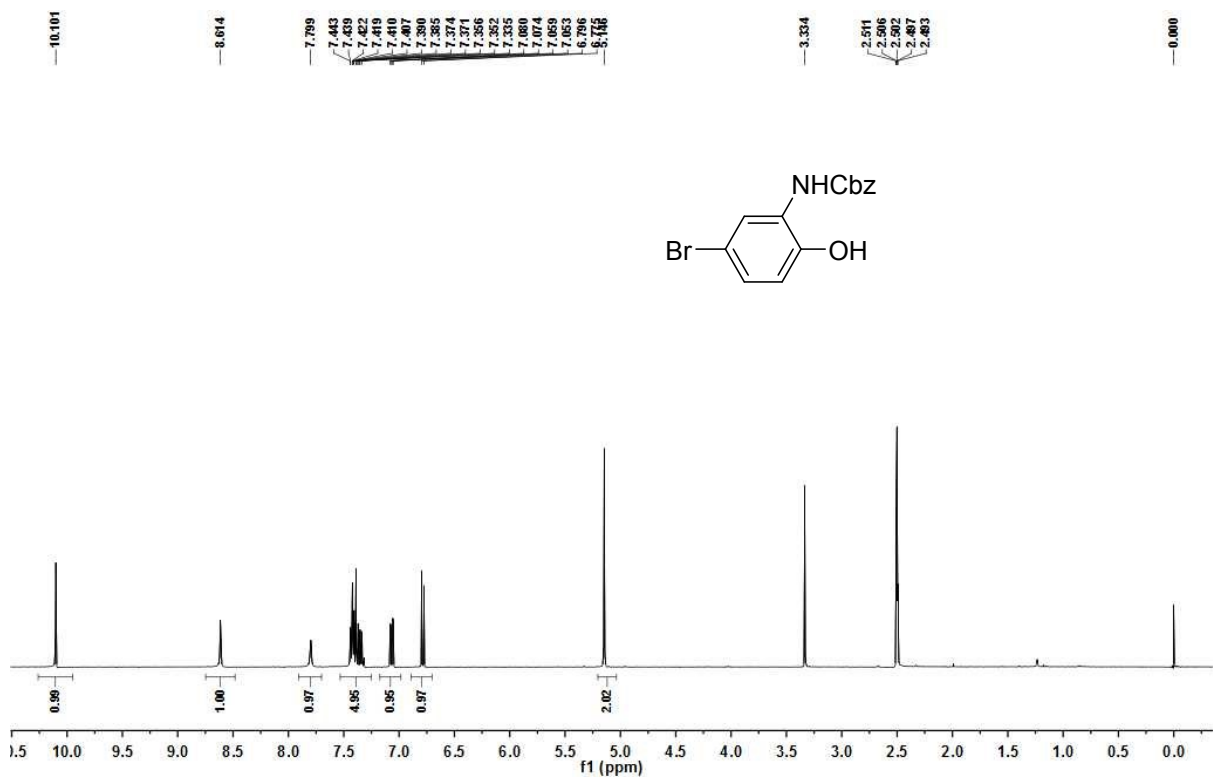

### Benzyl (4-bromo-2-hydroxyphenyl)carbamate (8i)

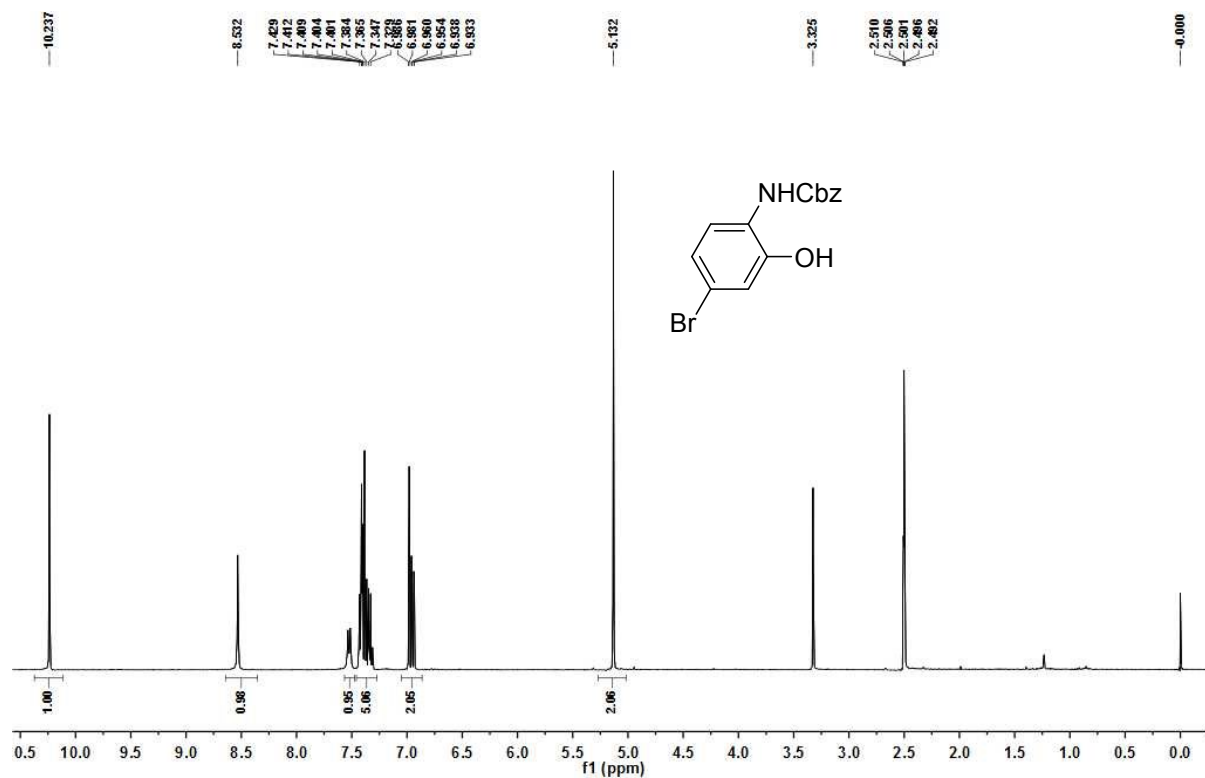

### Benzyl (3-bromo-2-hydroxyphenyl)carbamate (8j)

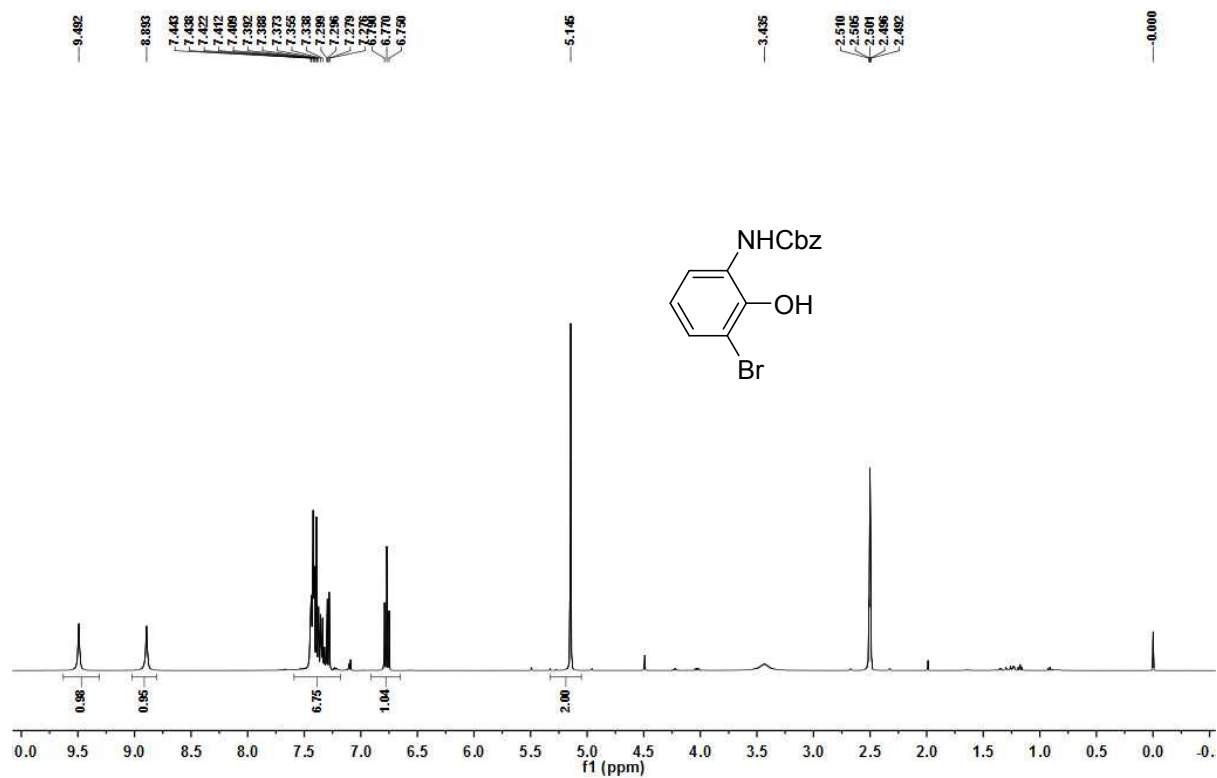

# **Benzyl (5-fluoro-2-hydroxyphenyl)carbamate (8k)**

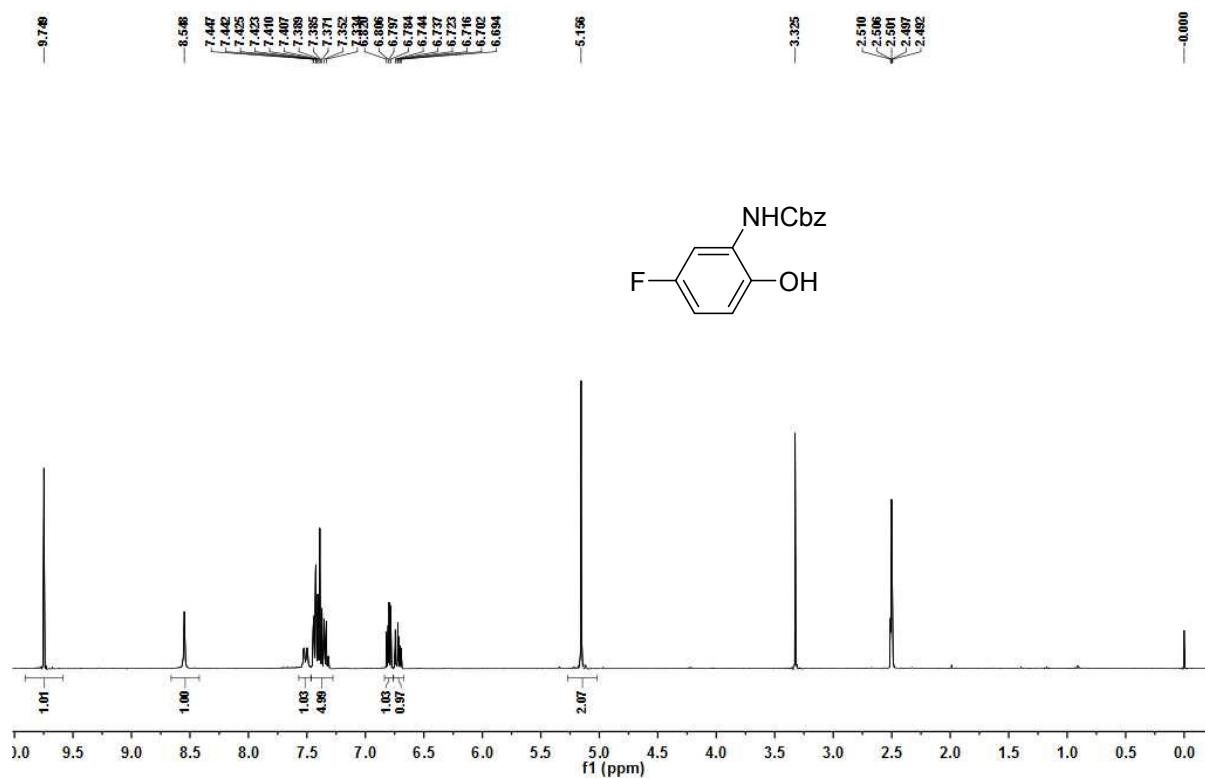

# **Benzyl (4-fluoro-2-hydroxyphenyl)carbamate (8l)**

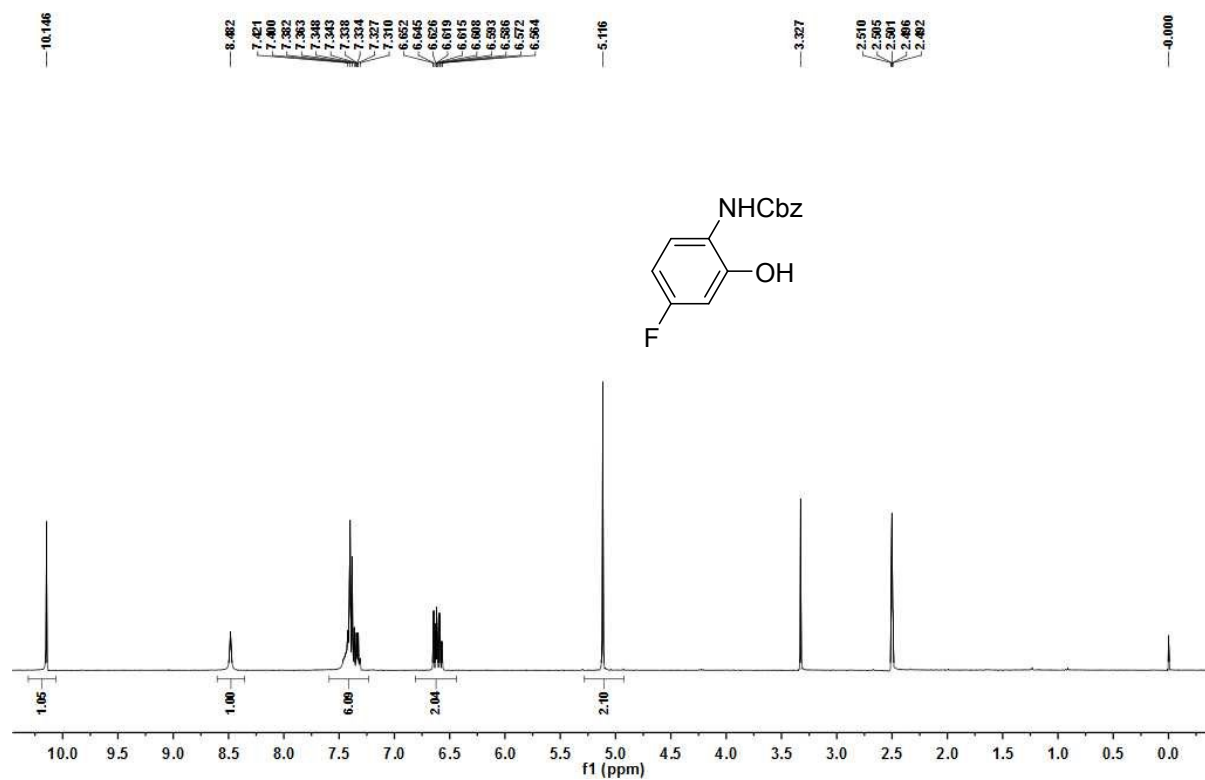

# **Benzyl (2,4-dichloro-6-hydroxyphenyl)carbamate (8m)**

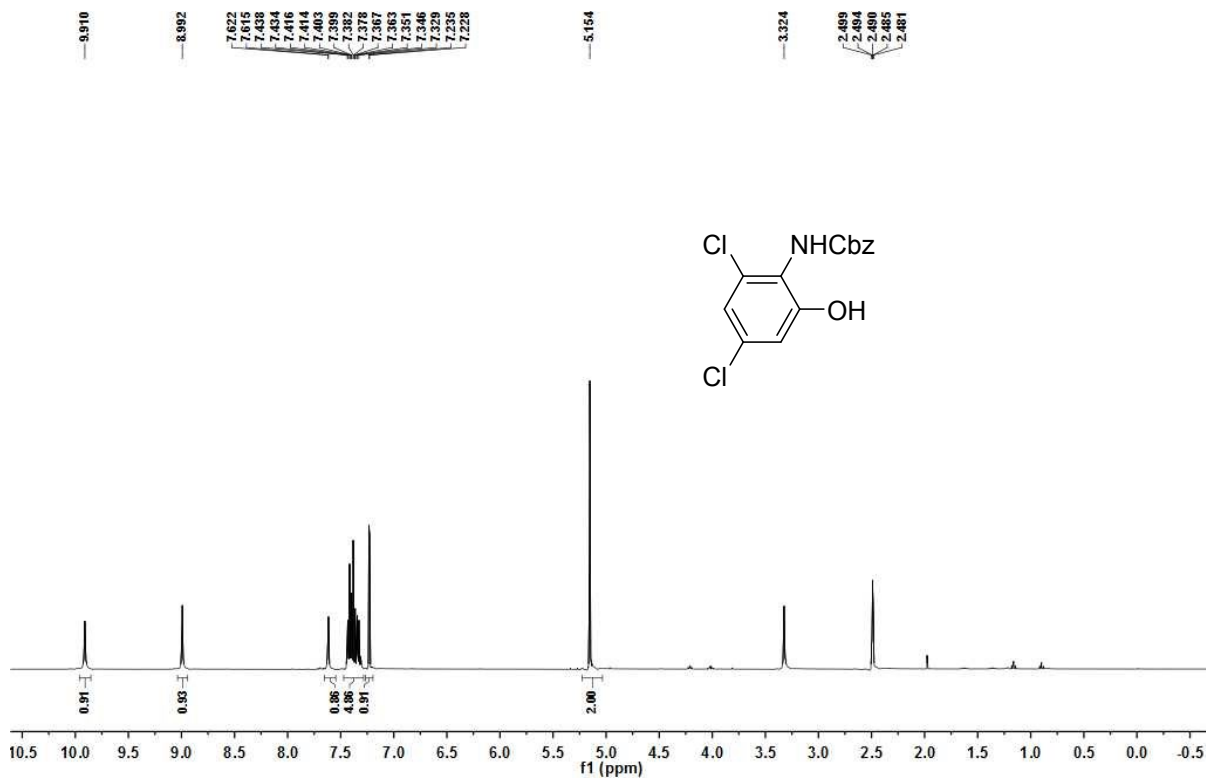

# **Benzyl (4,5-difluoro-2-hydroxyphenyl)carbamate (8n)**

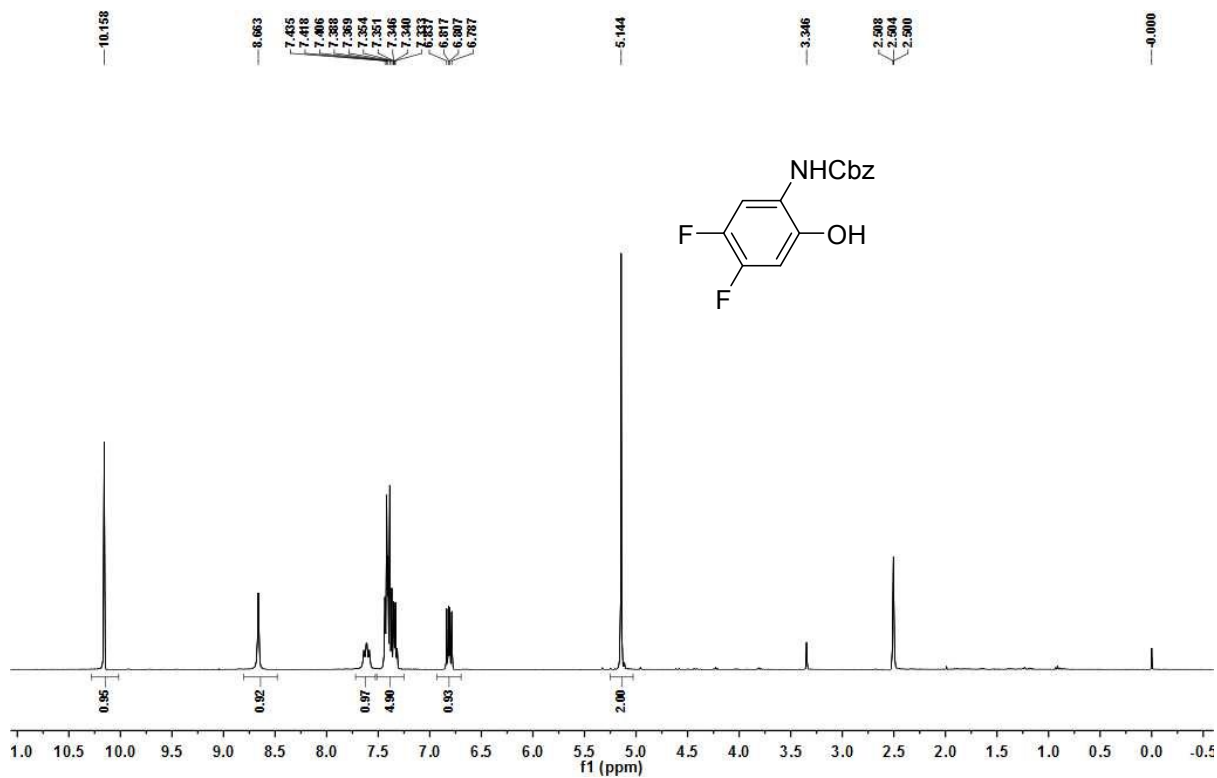

# **Benzyl (4-bromo-5-fluoro-2-hydroxyphenyl)carbamate (8o)**

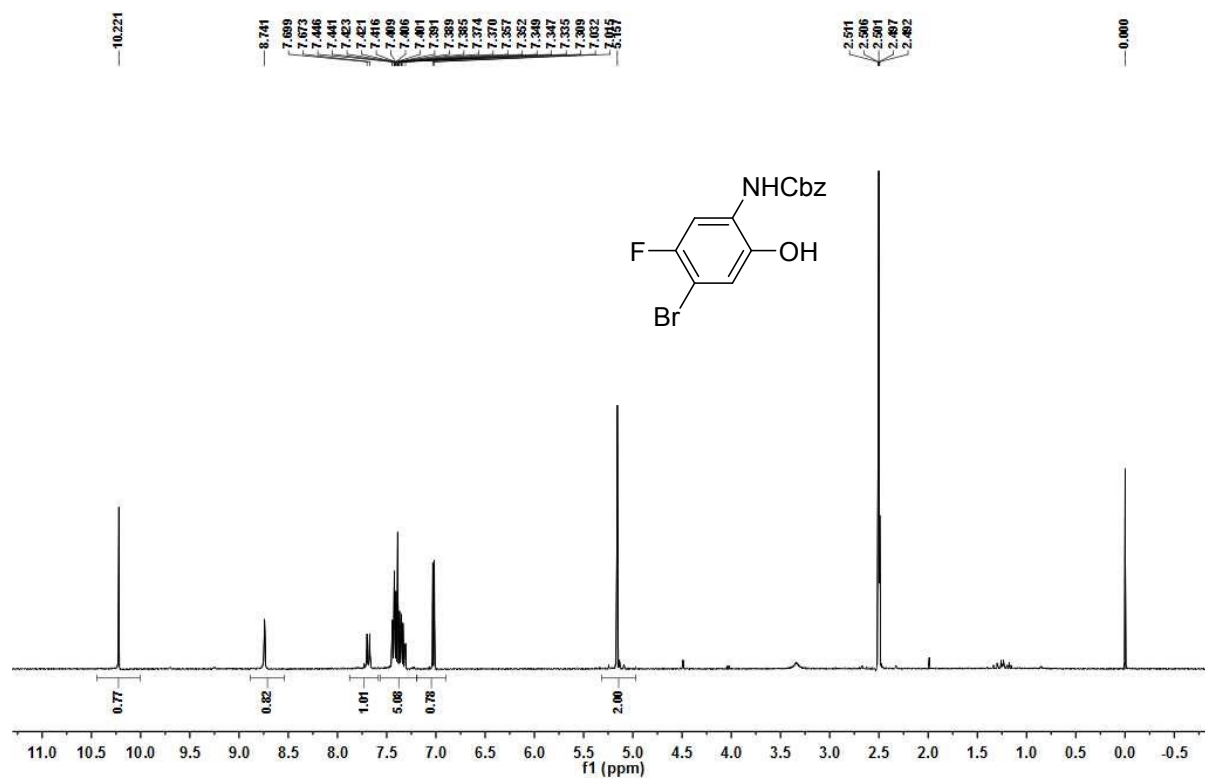

# **Benzyl (2-hydroxy-5-nitrophenyl)carbamate (8p)**

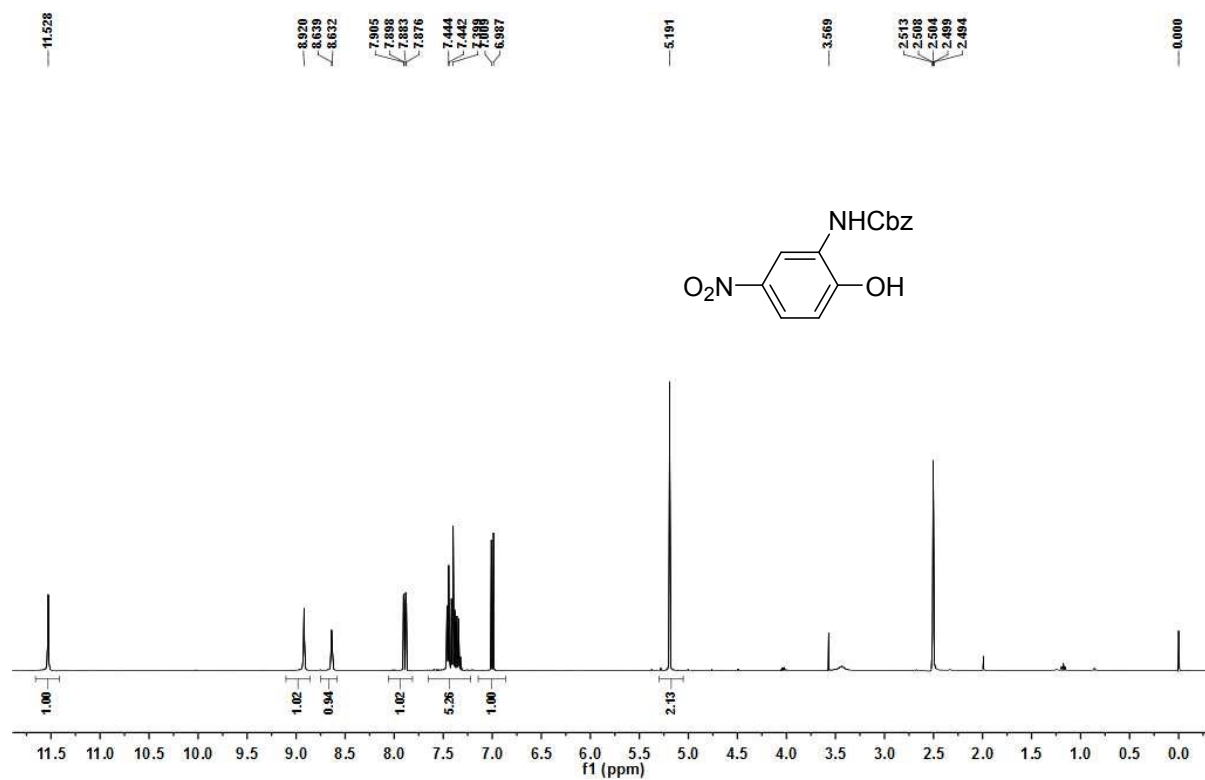

# **Benzyl (2-hydroxy-4-nitrophenyl)carbamate (8q)**

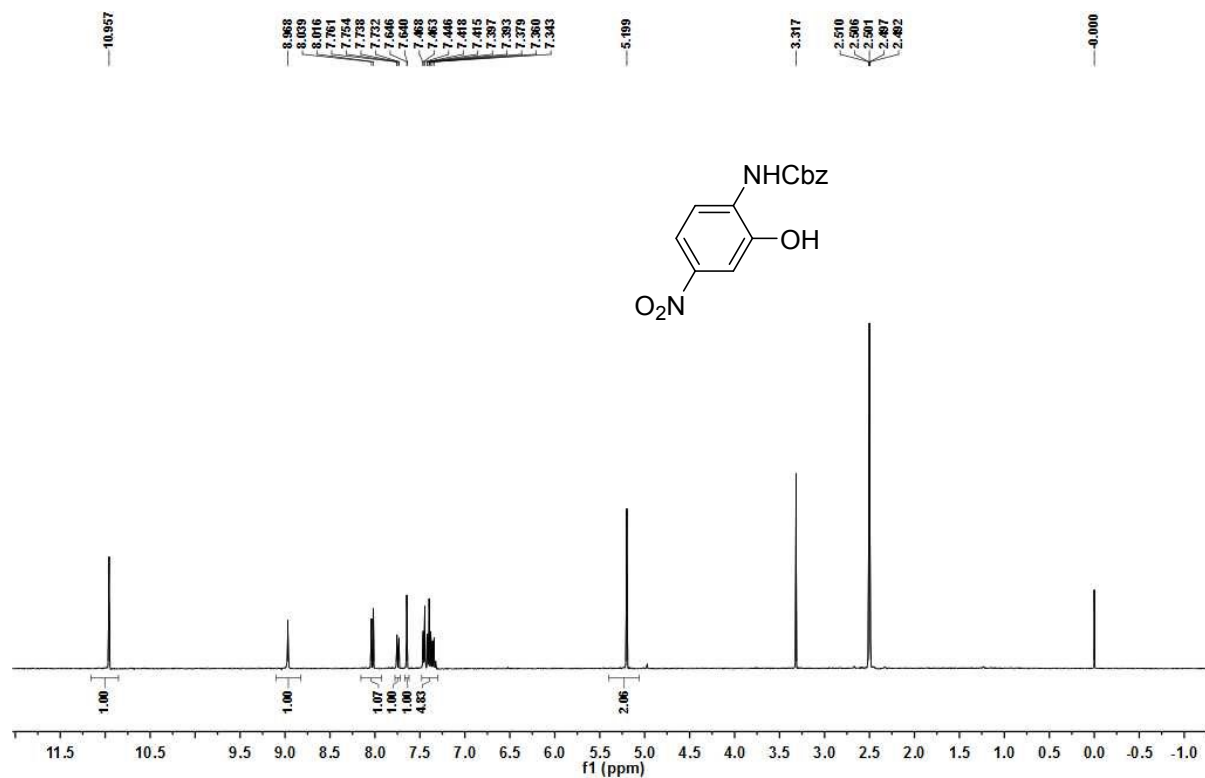

# **2-(*tert*-Butoxy)-4-fluoro-1-nitrobenzene**

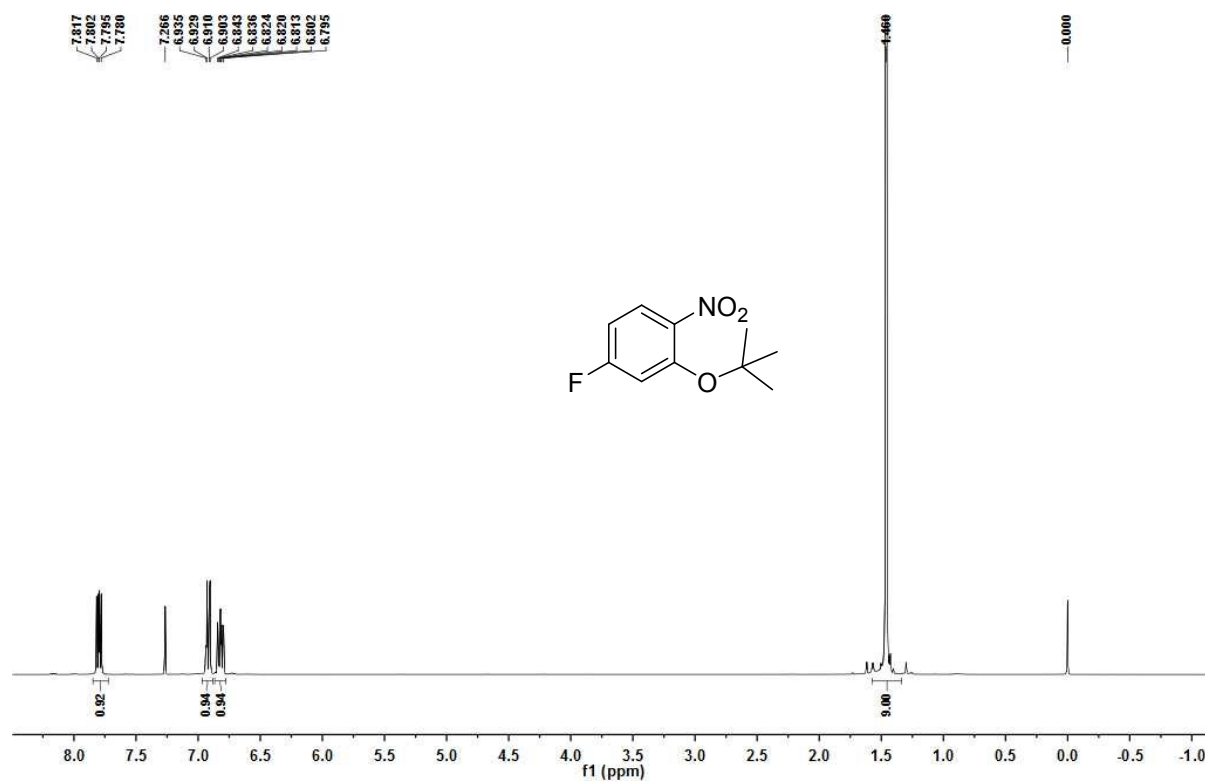

# 4-(3-(*tert*-Butoxy)-4-nitrophenyl)morpholin-3-one

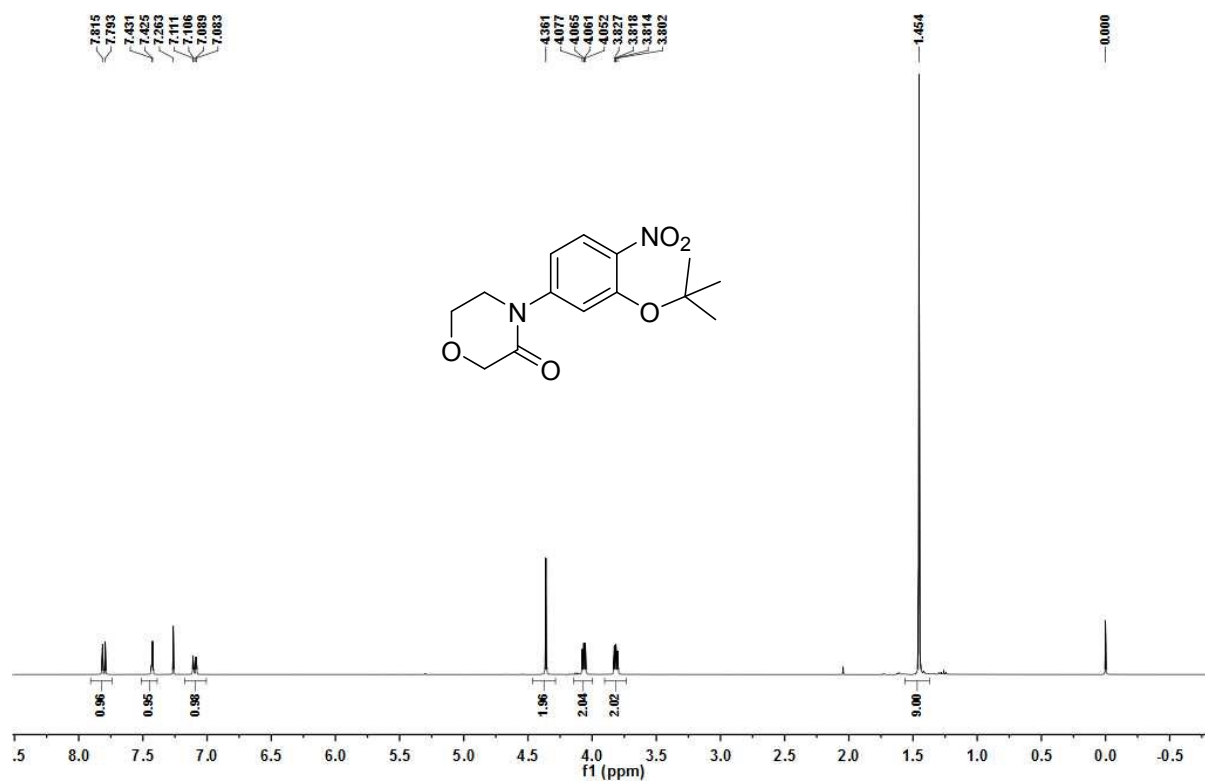

# 4-(3-Hydroxy-4-nitrophenyl)morpholin-3-one

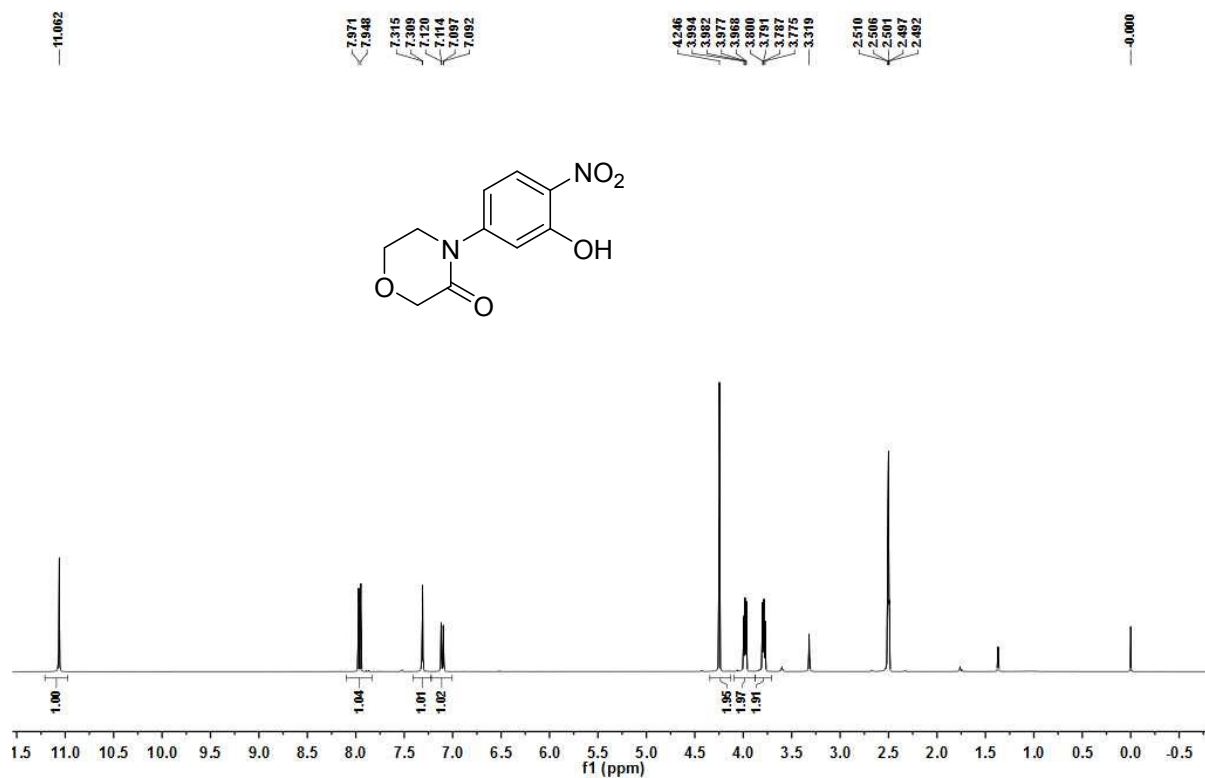

**Benzyl (2-hydroxy-4-(3-oxomorpholino)phenyl)carbamate (8r)**

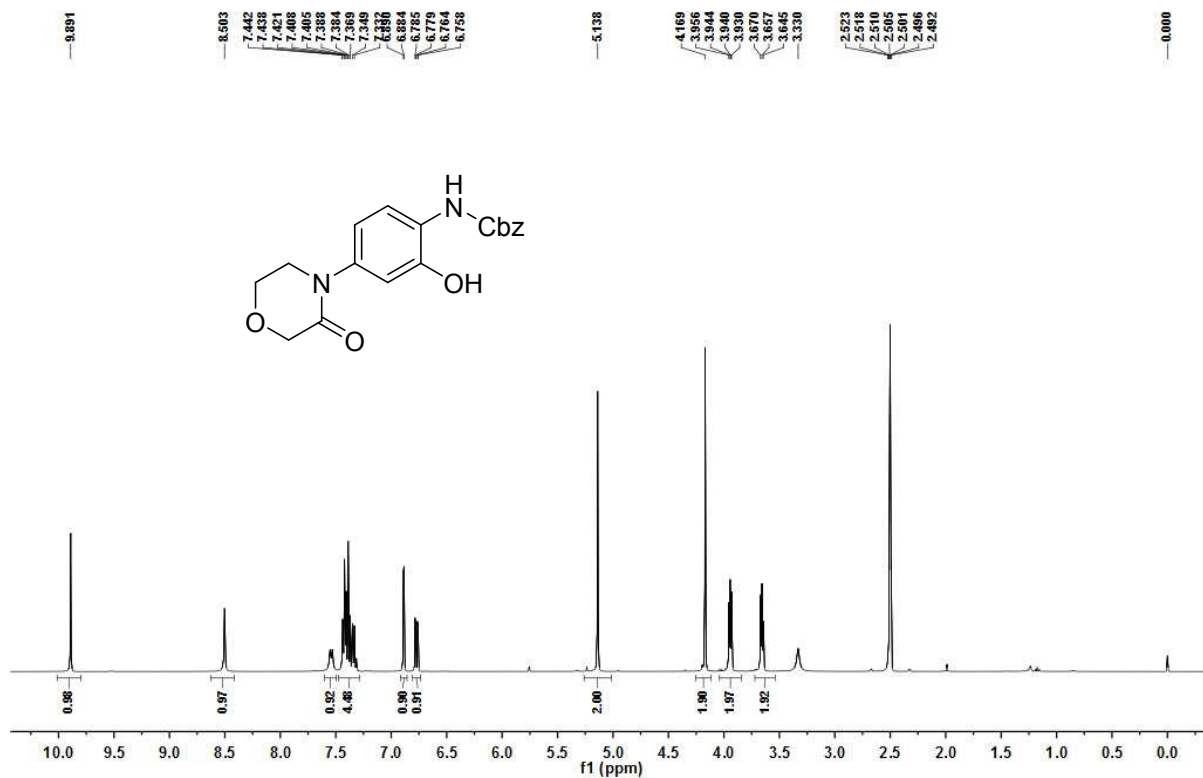

***cis*-(3-((Trityloxy)methyl)oxiran-2-yl)methanol ((±)-9a)**

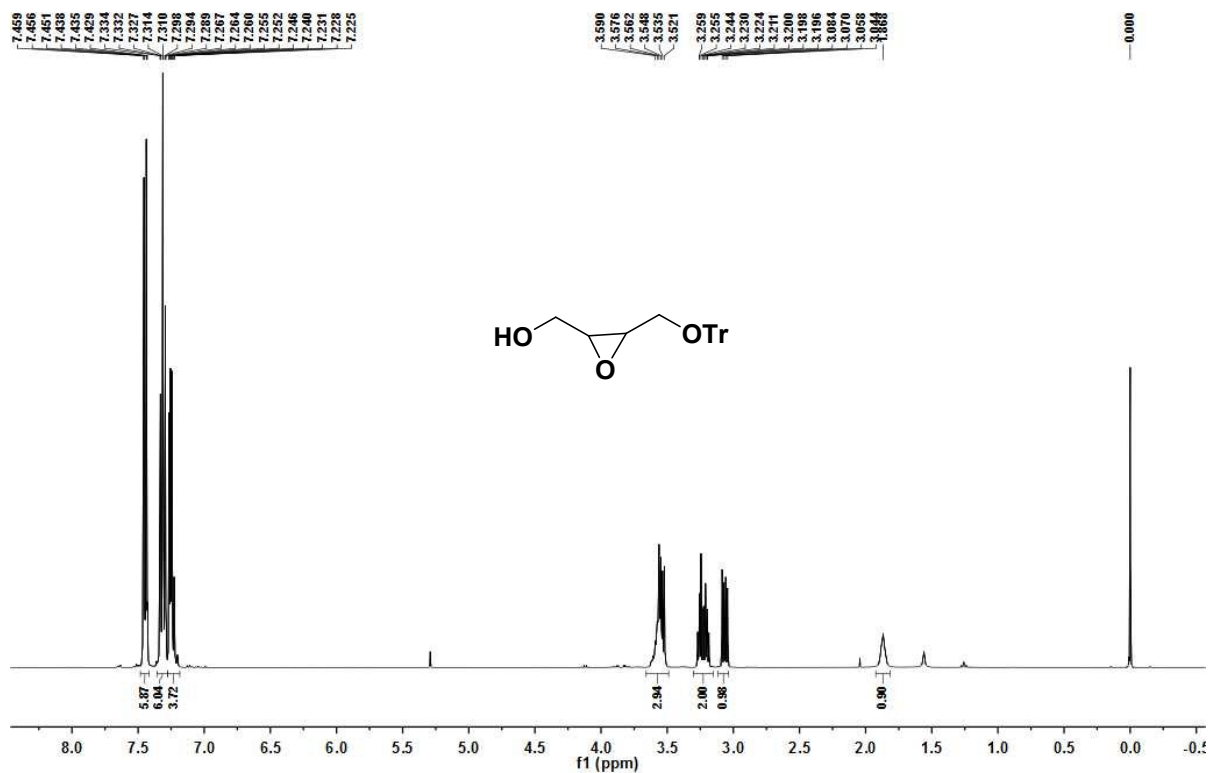

***trans*-(3-((Trityloxy)methyl)oxiran-2-yl)methanol ((±)-9c)**

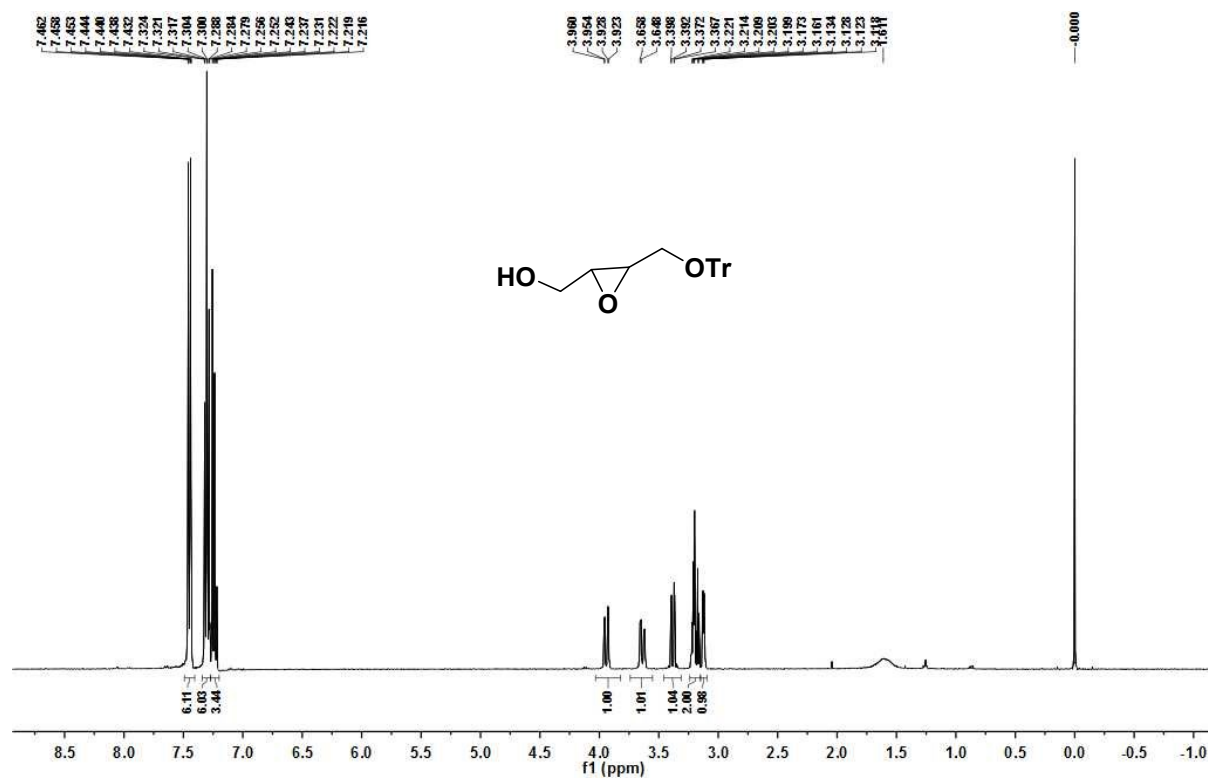

**(2*R*,3*S*)-(3-((Trityloxy)methyl)oxiran-2-yl)methanol (9a)**

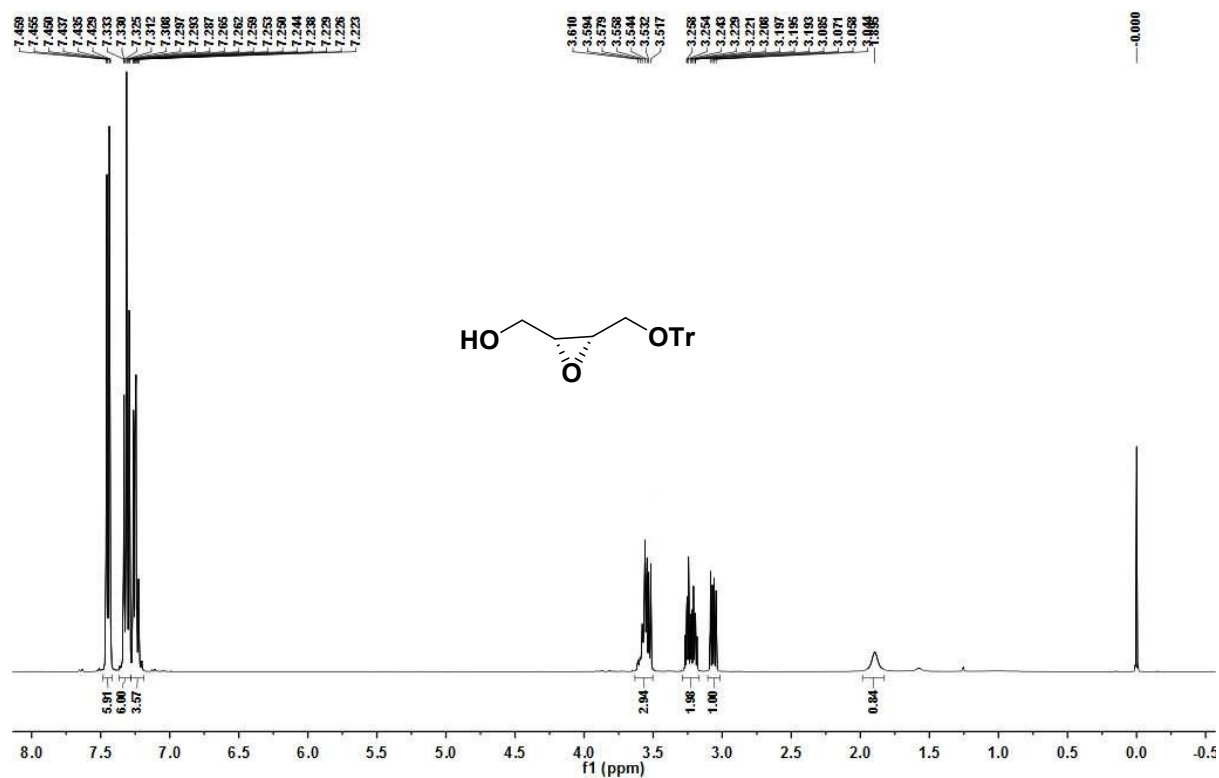

**(2*S*,3*R*)-3-((Trityloxy)methyl)oxiran-2-yl)methanol (9b)**

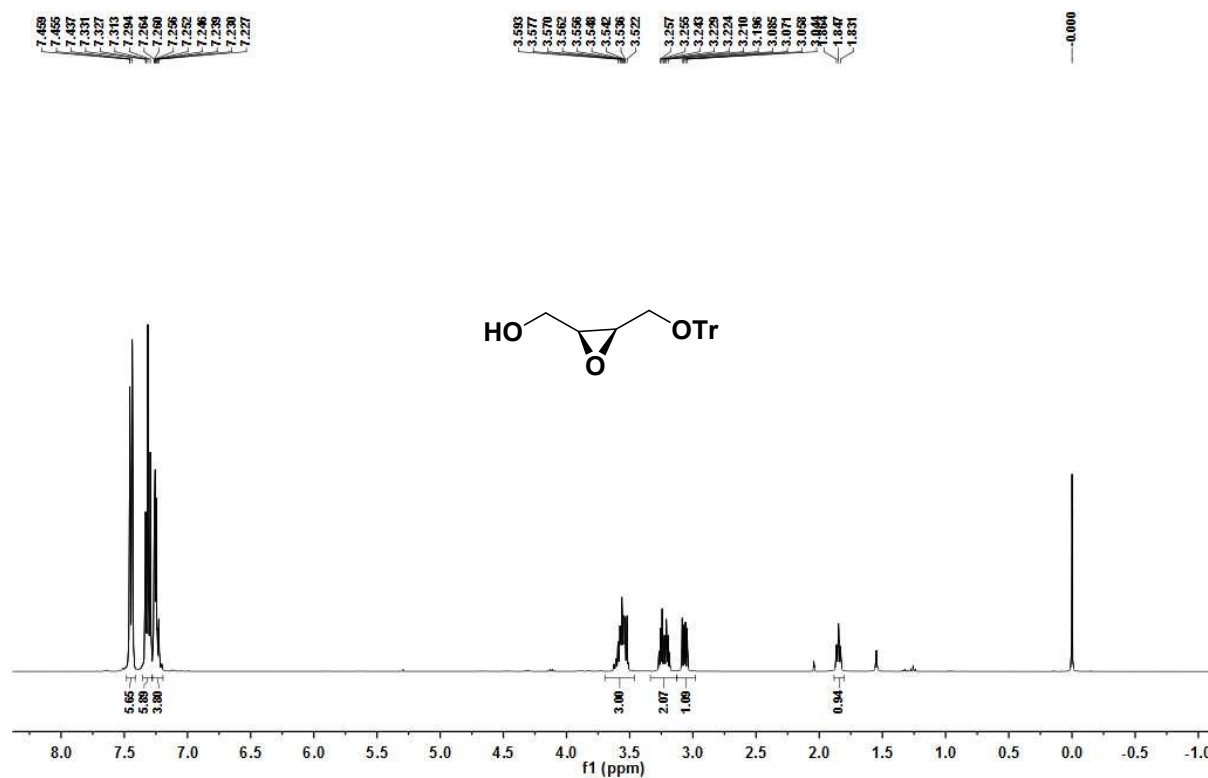

**((2*S*,3*S*)-3-((trityloxy)methyl)oxiran-2-yl)methanol (9c)**

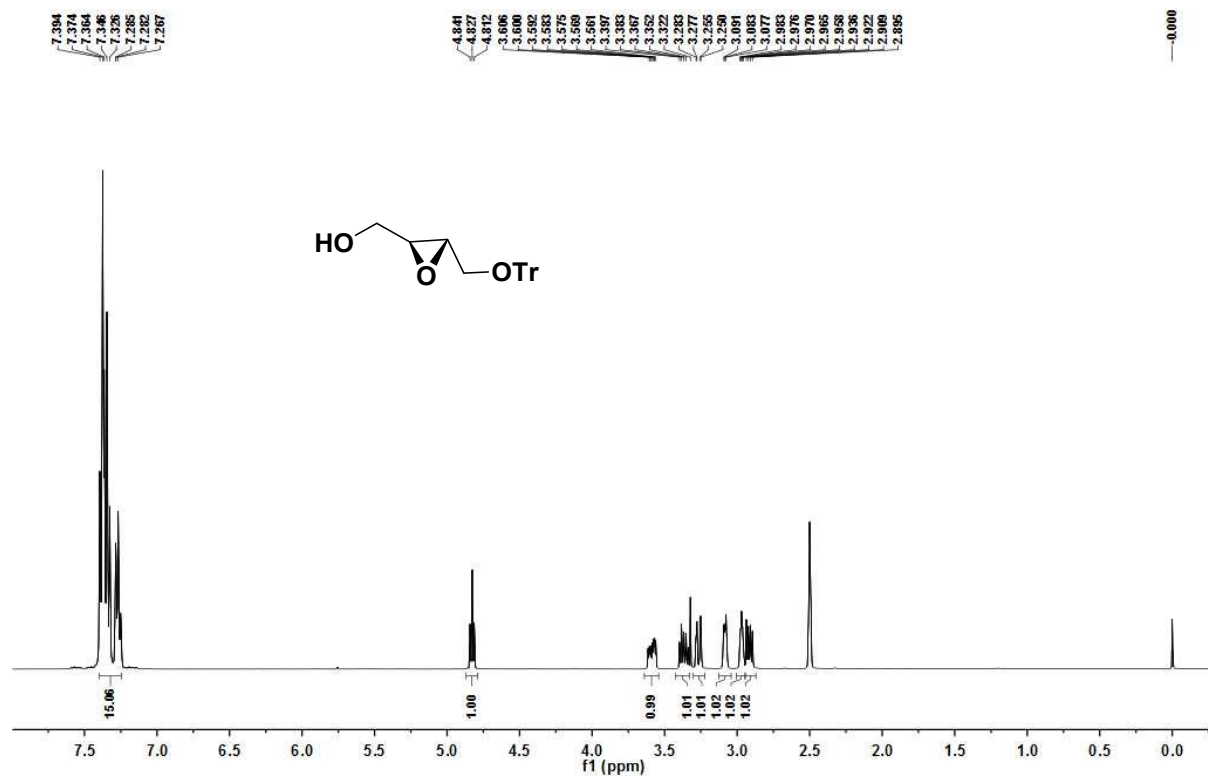

**((2*R*,3*R*)-3-((trityloxy)methyl)oxiran-2-yl)methanol (9d)**

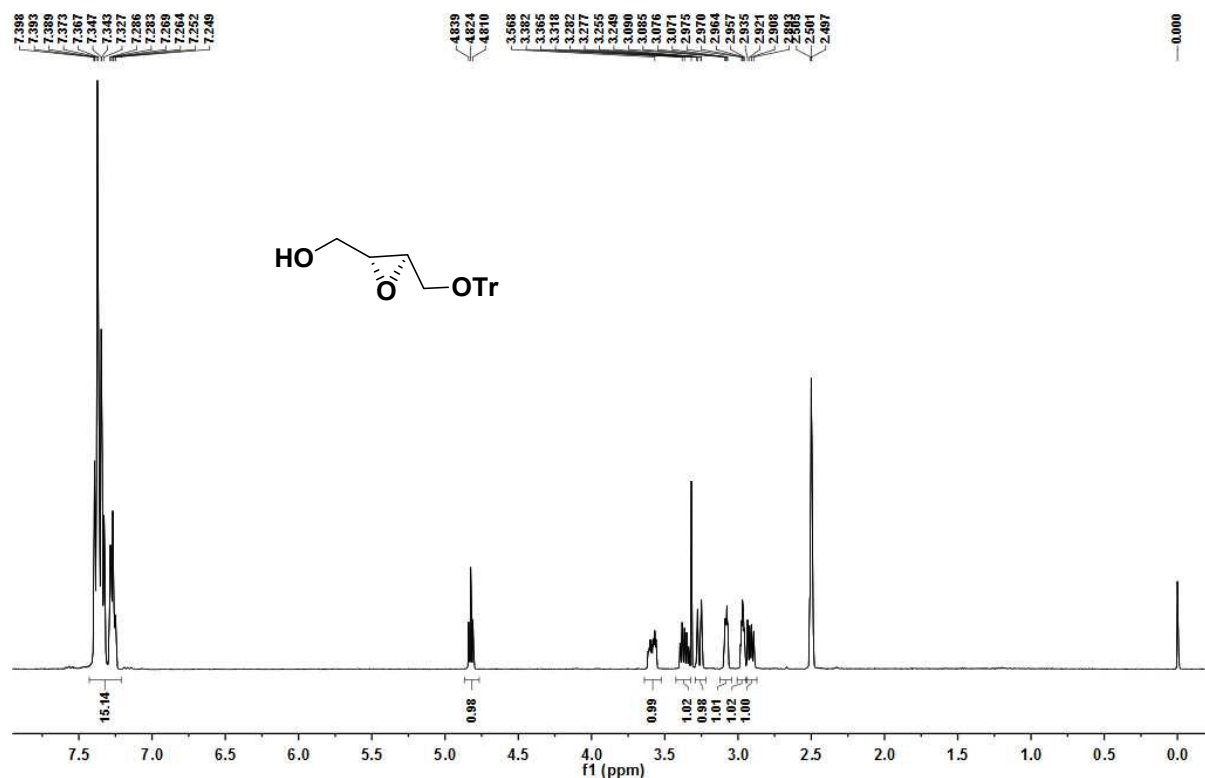

***tert*-Butyl(2-(((2*R*,3*S*)-3-((trityloxy)methyl)oxiran-2-yl)methoxy)phenyl)carbamate (10a)**

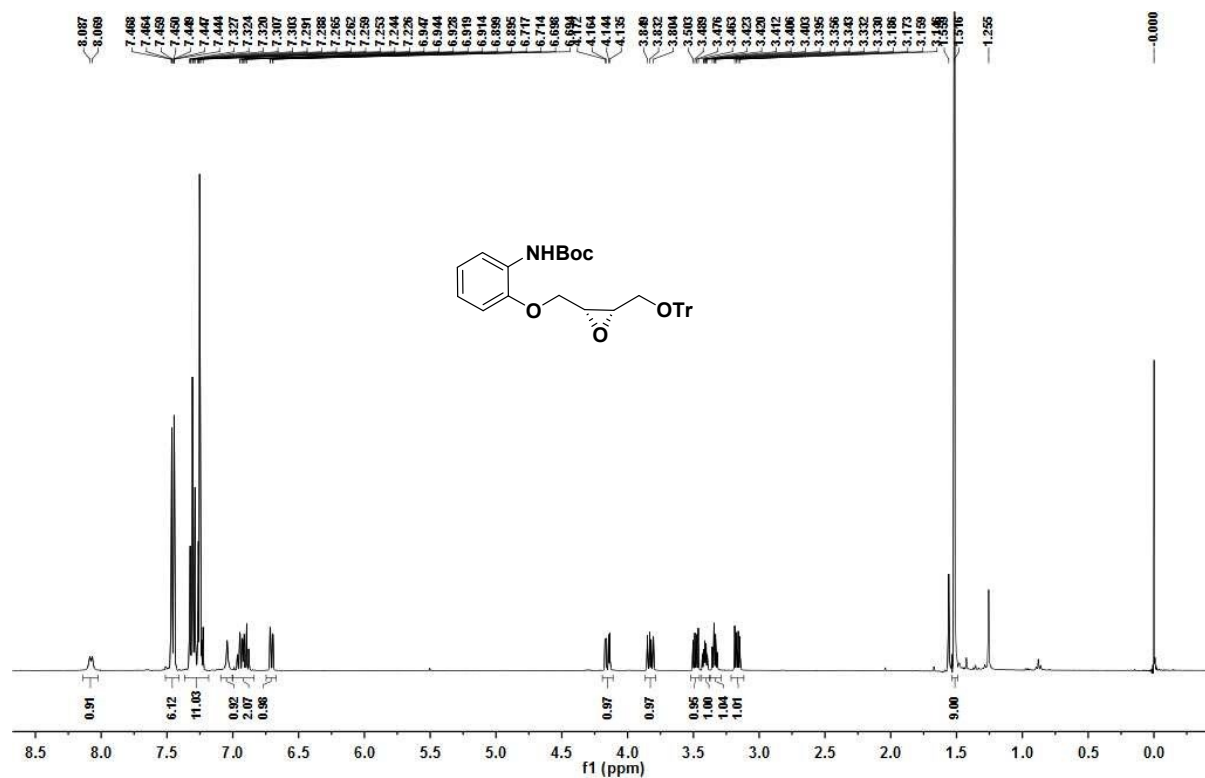

**Benzyl(2-(((2*R*,3*S*)-3-((trityloxy)methyl)oxiran-2-yl)methoxy)phenyl)carbamate (10b)**

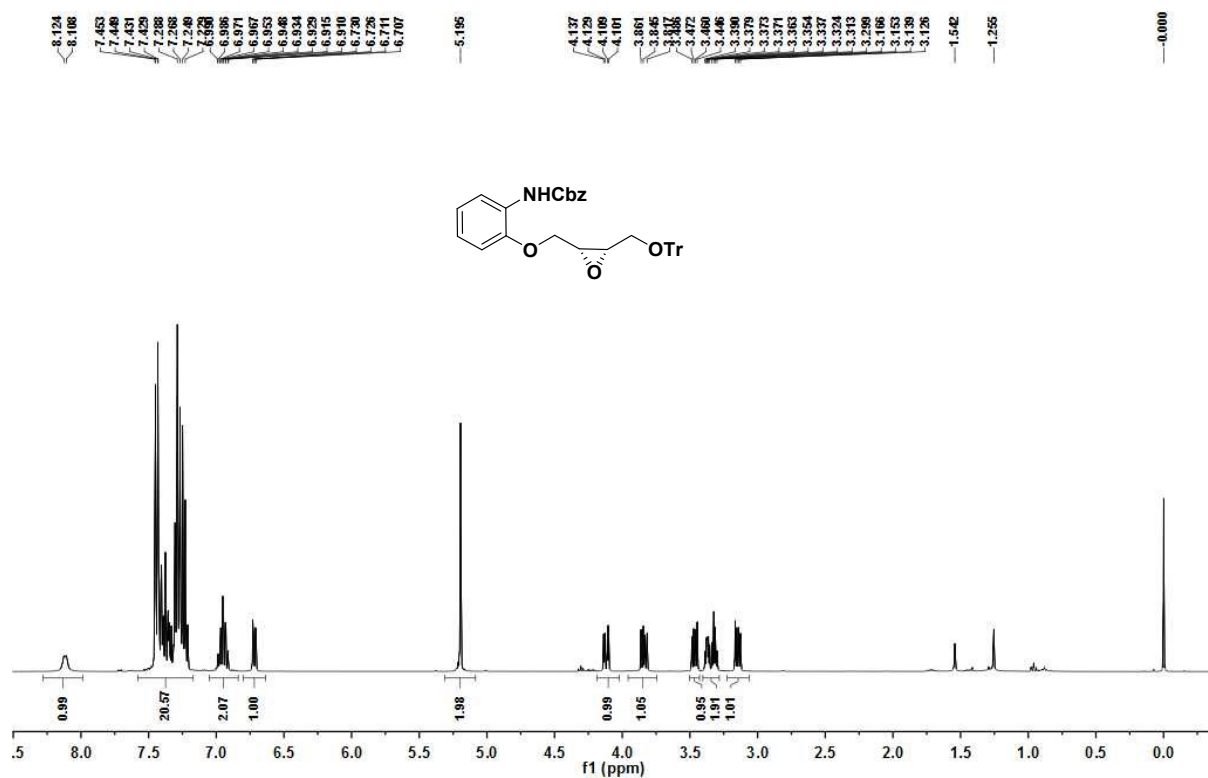

***trans*-3-((Trityloxy)methyl)-3a,4-dihydro-1*H*,3*H*-benzo[*b*]oxazolo[3,4-*d*][1,4]oxazin-1-one ((±)-11aa).**

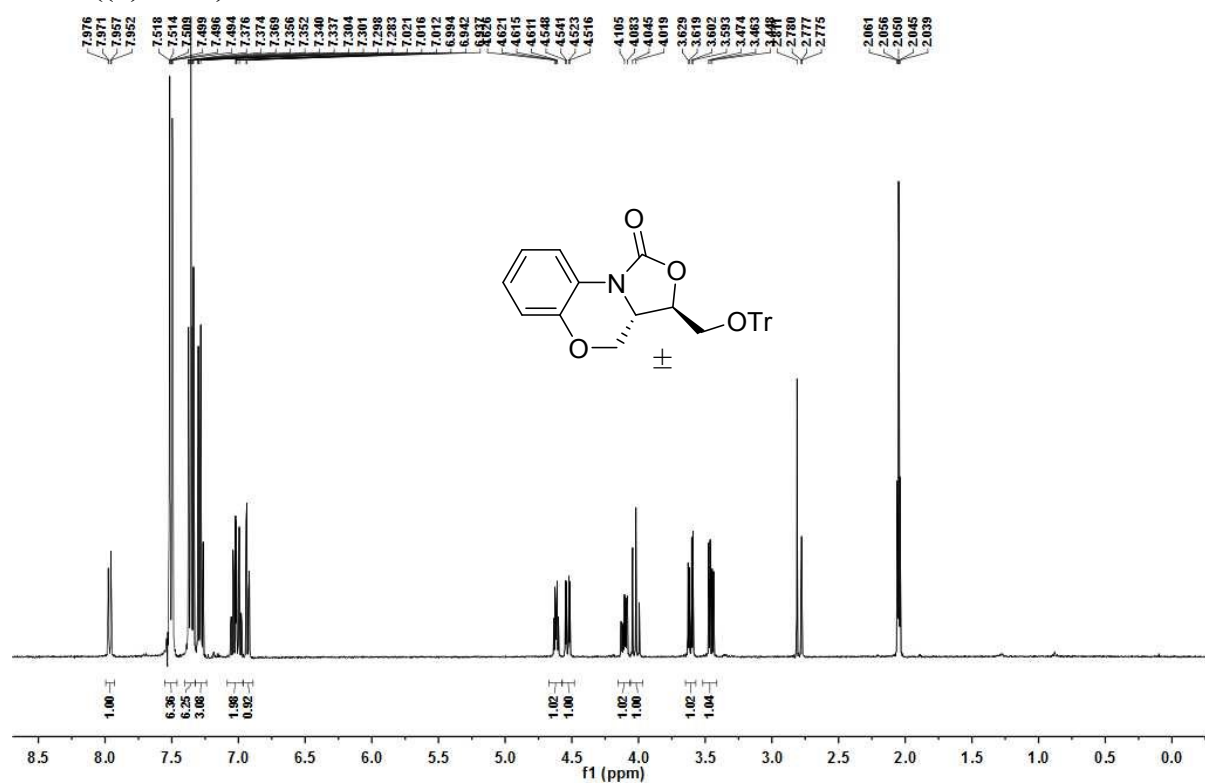

***trans*-3-((Trityloxy)methyl)-3a,4-dihydro-1*H*,3*H*-benzo[*b*]oxazolo[3,4-*d*][1,4]oxazin-1-one ((±)-11aa).**

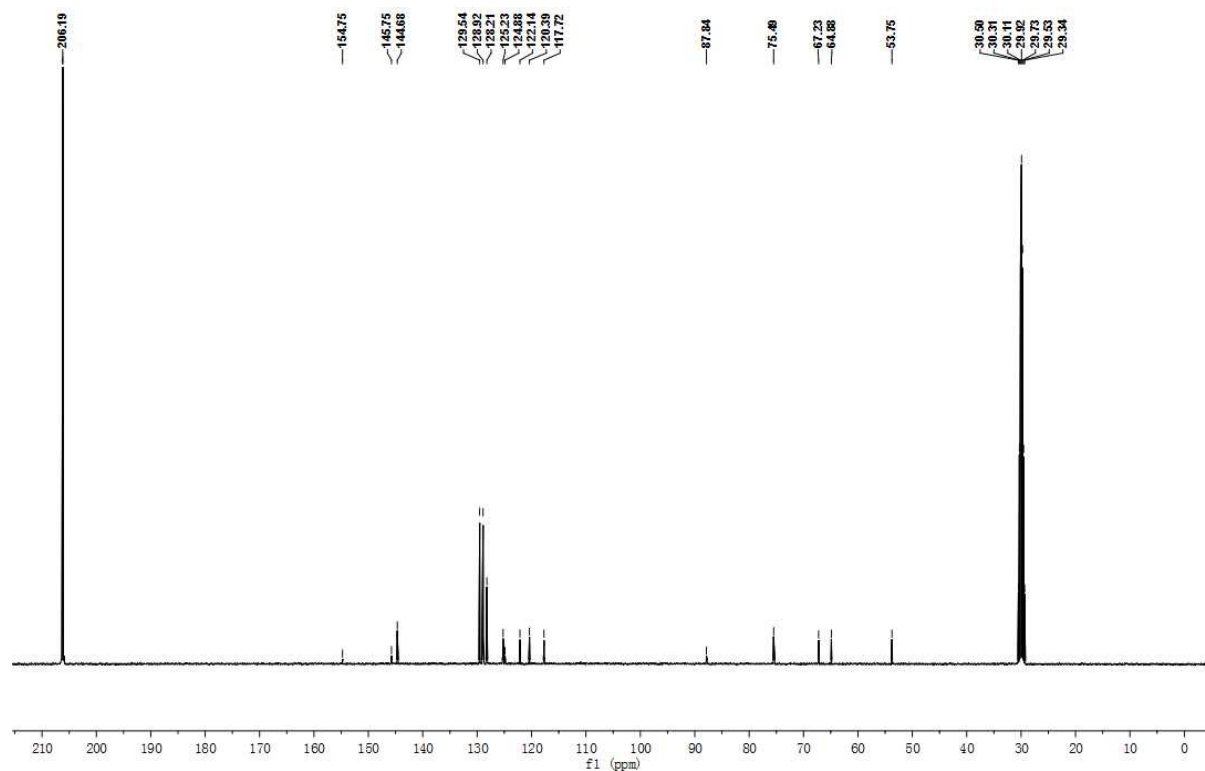

*cis*-3-((Tritylloxy)methyl)-3a,4-dihydro-1*H*,3*H*-benzo[*b*]oxazolo[3,4-*d*][1,4]oxazin-1-one  
((±)-11c)

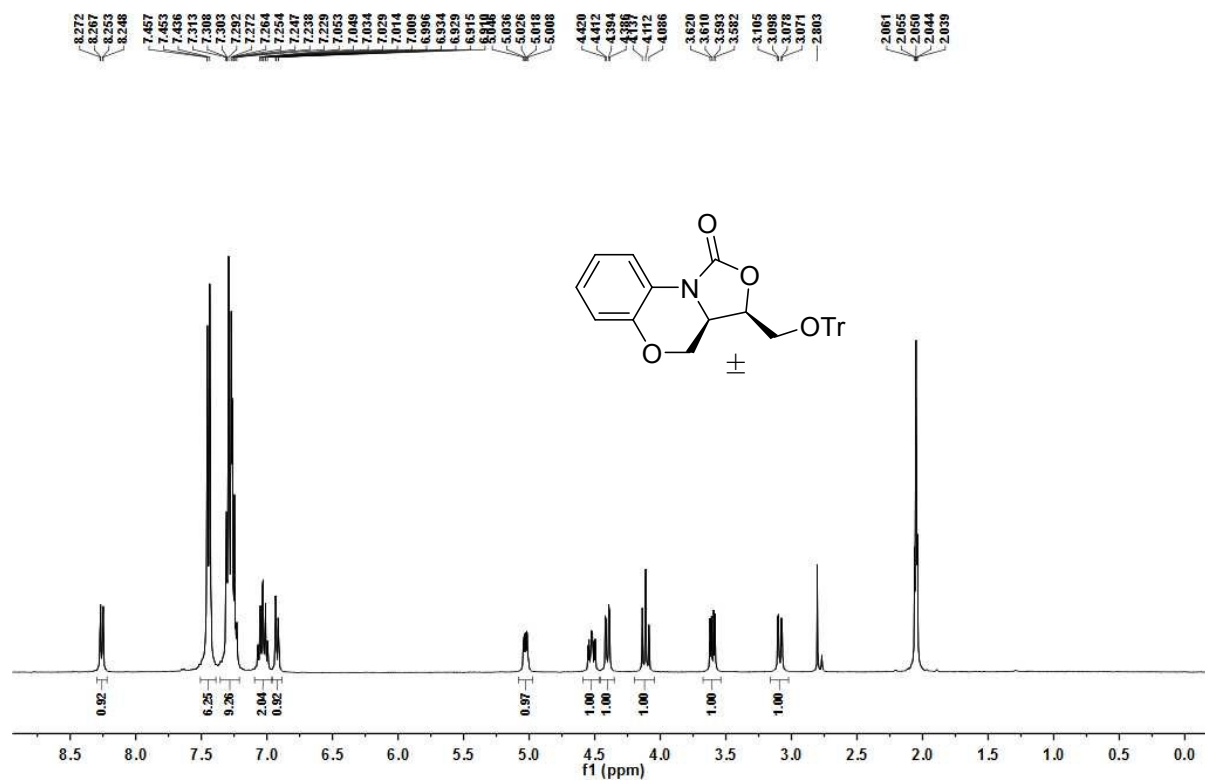

*cis*-3-((Tritylloxy)methyl)-3a,4-dihydro-1*H*,3*H*-benzo[*b*]oxazolo[3,4-*d*][1,4]oxazin-1-one  
((±)-11c)

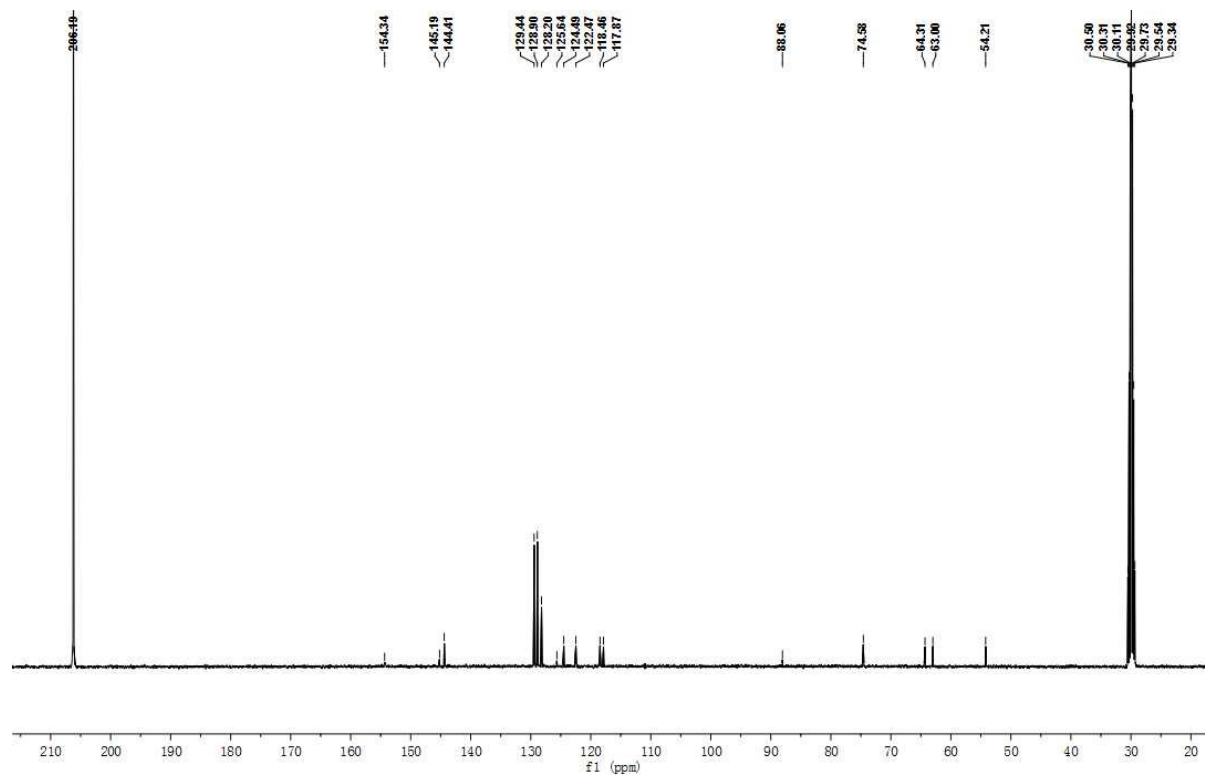

**(3*R*,3*aS*)-3-((Trityloxy)methyl)-3*a*,4-dihydro-1*H*,3*H*-benzo[*b*]oxazolo[3,4-*d*][1,4]oxazin-1-one (11aa)**

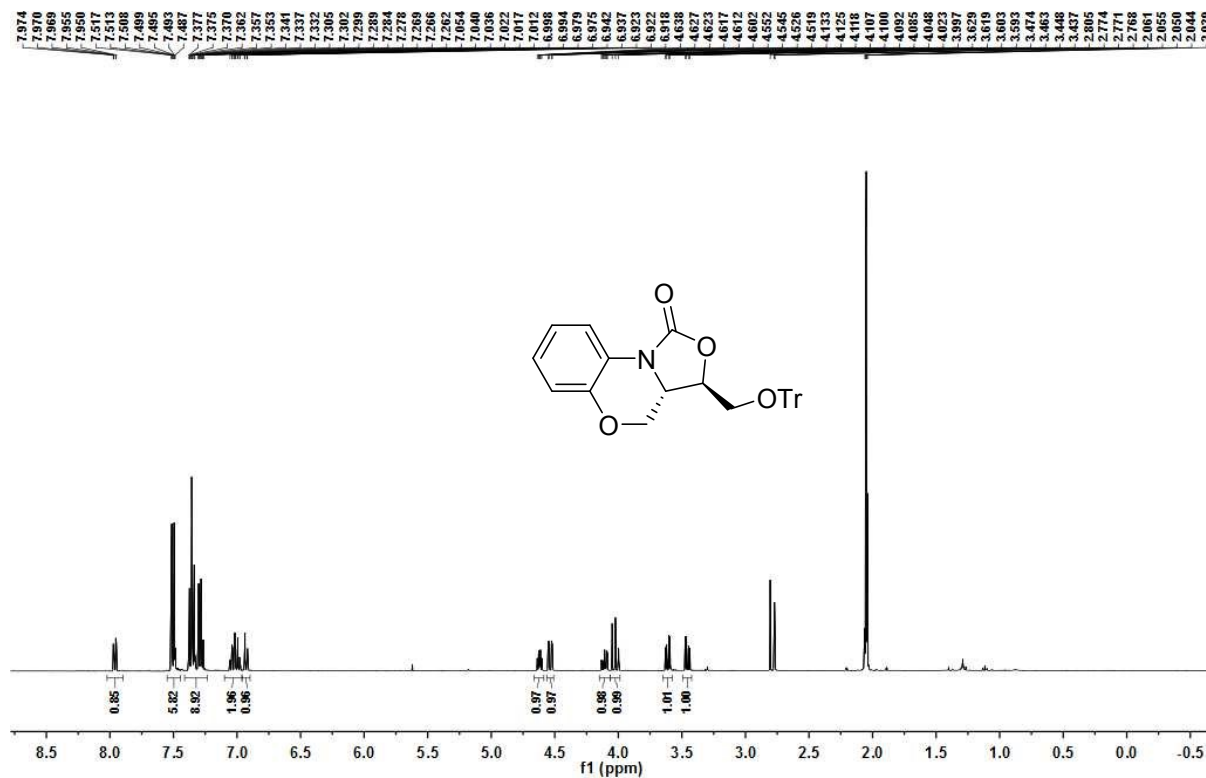

**(3*R*,3*aS*)-3-((Trityloxy)methyl)-3*a*,4-dihydro-1*H*,3*H*-benzo[*b*]oxazolo[3,4-*d*][1,4]oxazin-1-one (11aa)**

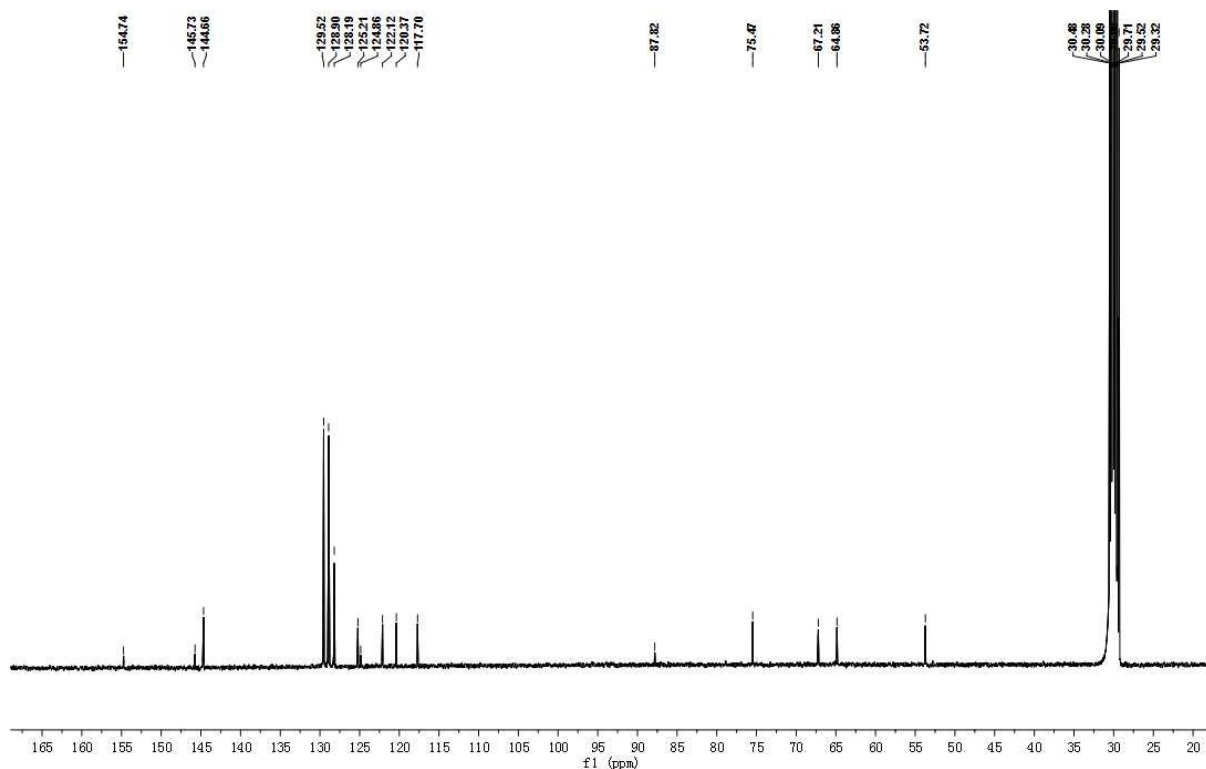

**(3*S*,3*aR*)-3-((Trityloxy)methyl)-3*a*,4-dihydro-1*H*,3*H*-benzo[*b*]oxazolo[3,4-*d*][1,4]oxazin-1-one (11b)**

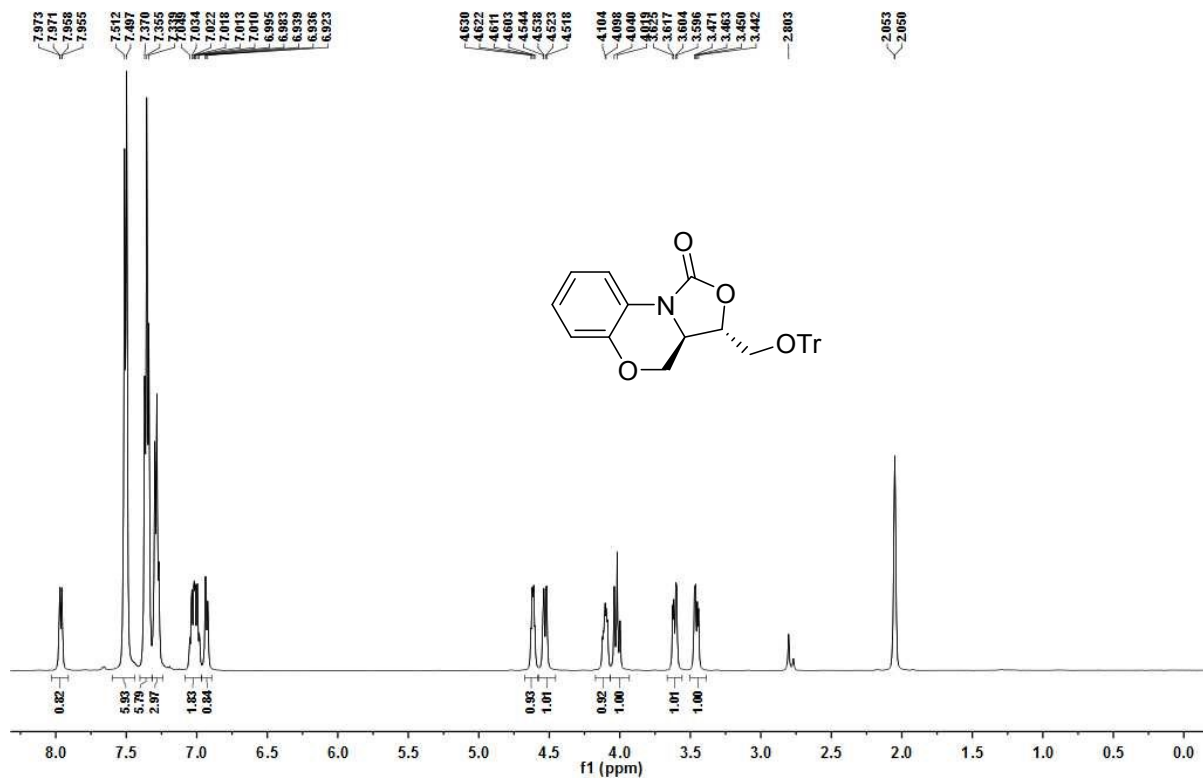

**(3*S*,3*aR*)-3-((Trityloxy)methyl)-3*a*,4-dihydro-1*H*,3*H*-benzo[*b*]oxazolo[3,4-*d*][1,4]oxazin-1-one (11b)**

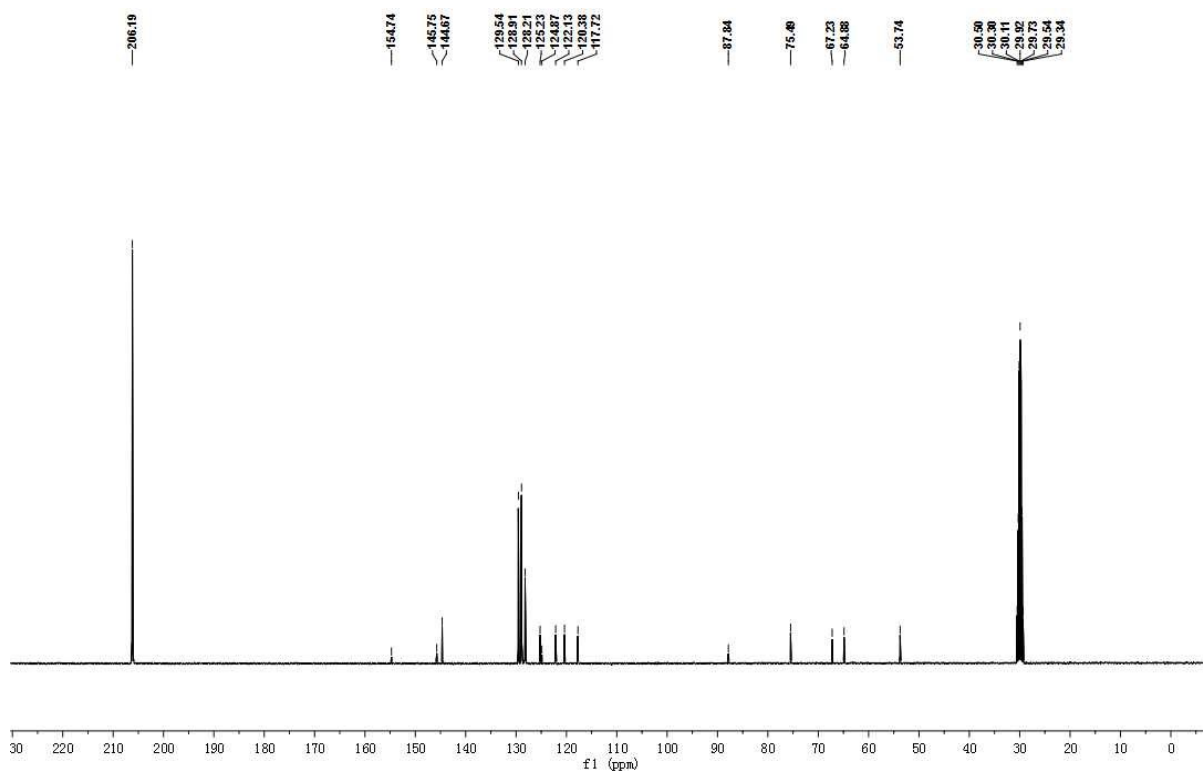

**(3*R*,3*aR*)-3-((Trityloxy)methyl)-3*a*,4-dihydro-1*H*,3*H*-benzo[*b*]oxazolo[3,4-*d*][1,4]oxazin-1-one (11c)**

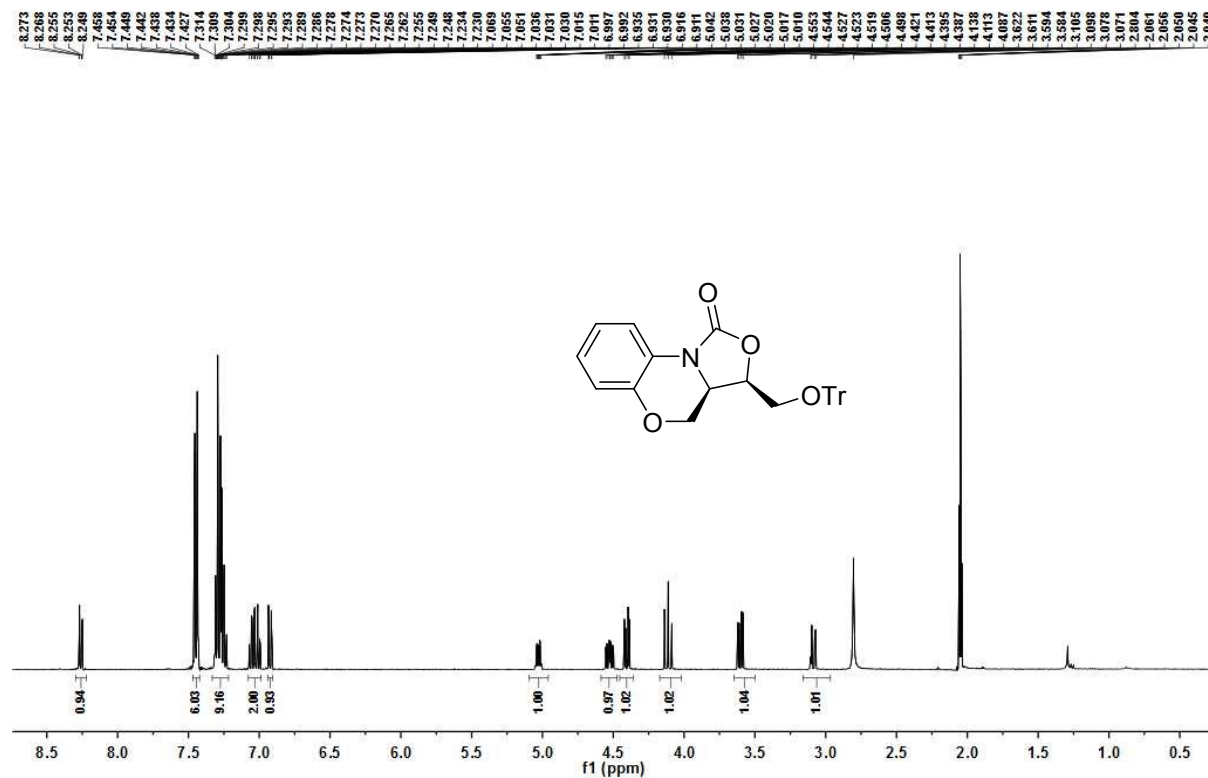

**(3*R*,3*aR*)-3-((Trityloxy)methyl)-3*a*,4-dihydro-1*H*,3*H*-benzo[*b*]oxazolo[3,4-*d*][1,4]oxazin-1-one (11c)**

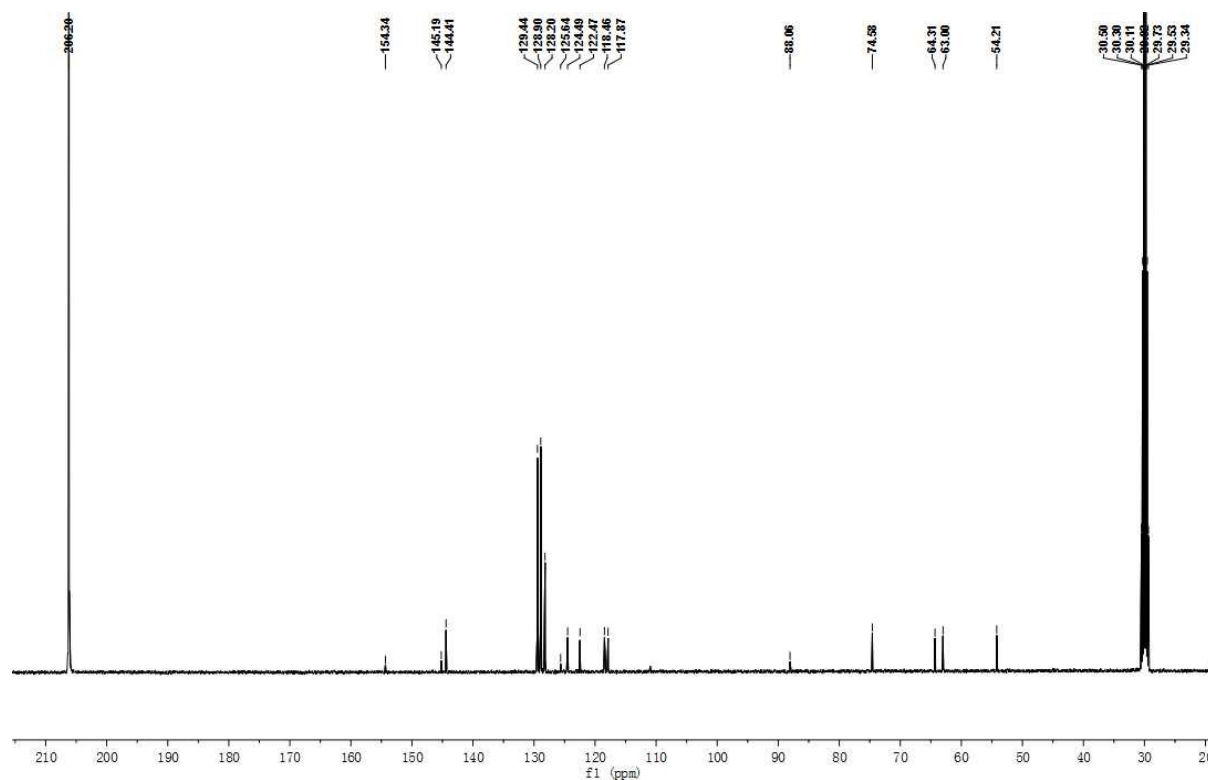

**(3*S*,3*aS*)-3-((Trityloxy)methyl)-3*a*,4-dihydro-1*H*,3*H*-benzo[*b*]oxazolo[3,4-*d*][1,4]oxazin-1-one (11d)**

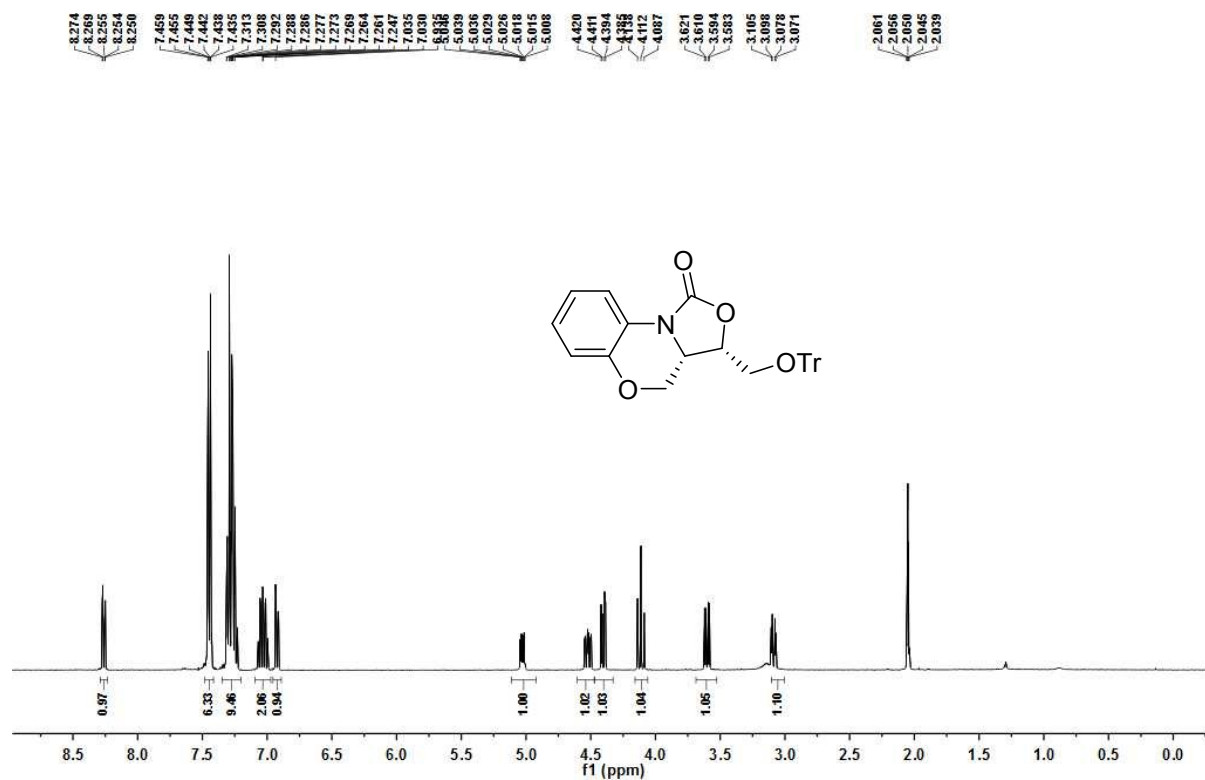

**(3*R*,3*aS*)-8-Methoxy-3-((trityloxy)methyl)-3*a*,4-dihydro-1*H*,3*H*-benzo[*b*]oxazolo[3,4-*d*][1,4]oxazin-1-one (11ab)**

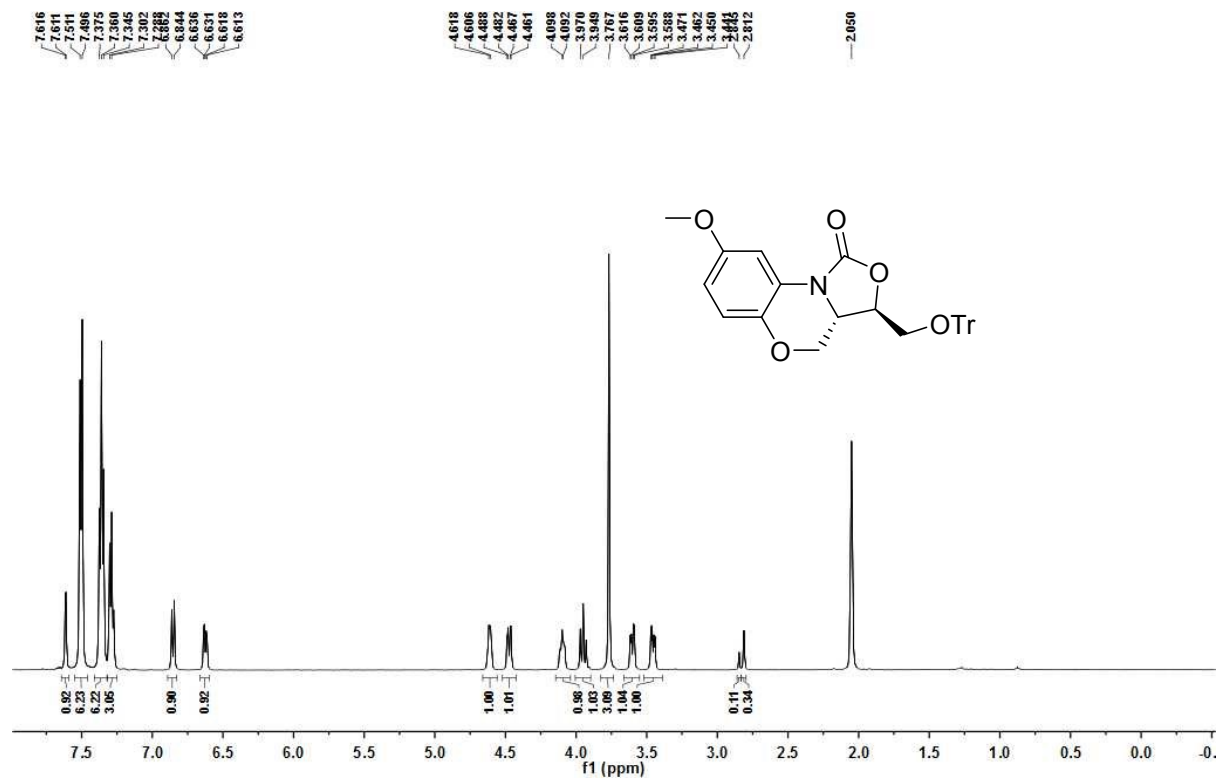

**(3*R*,3*aS*)-8-Methoxy-3-((trityloxy)methyl)-3*a*,4-dihydro-1*H*,3*H*-benzo[*b*]oxazolo[3,4-*d*][1,4]oxazin-1-one (11ab)**

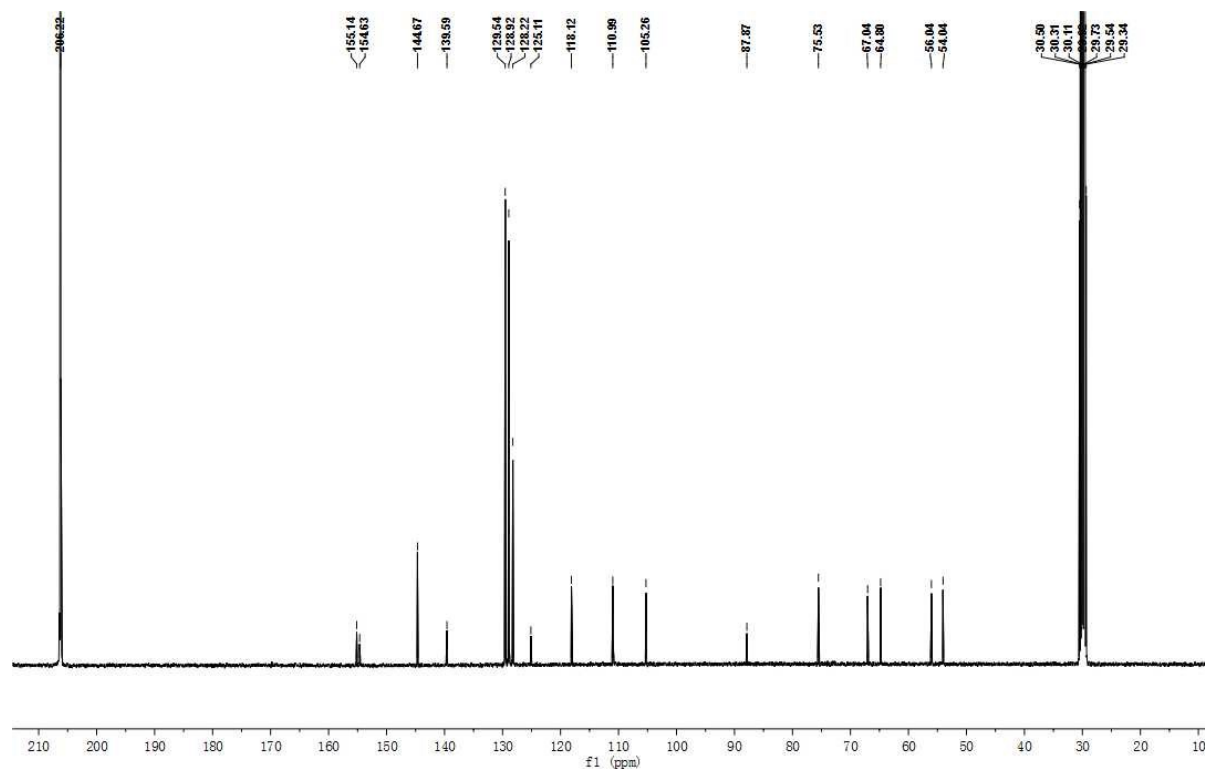

**(3*R*,3*aS*)-7-Methoxy-3-((trityloxy)methyl)-3*a*,4-dihydro-1*H*,3*H*-benzo[*b*]oxazolo[3,4-*d*][1,4]oxazin-1-one (11ac)**

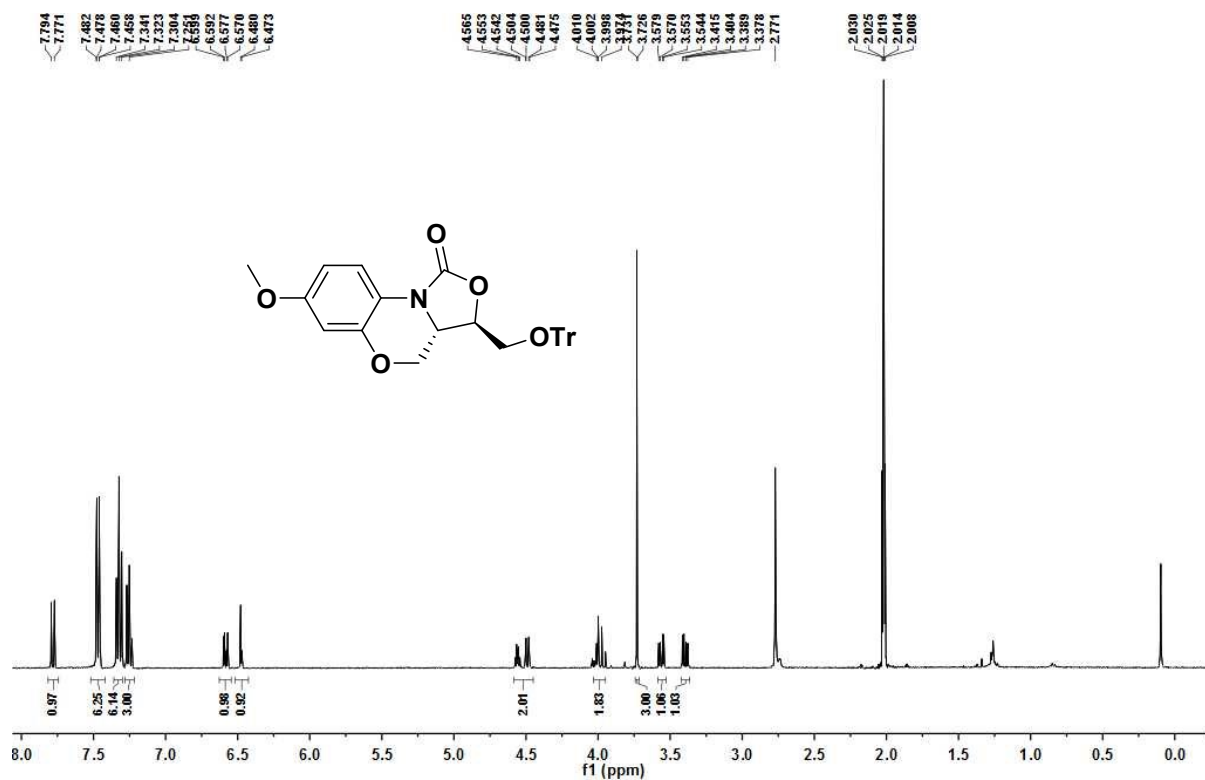

**(3*R*,3*aS*)-7-Methoxy-3-((trityloxy)methyl)-3*a*,4-dihydro-1*H*,3*H*-benzo[*b*]oxazolo[3,4-*d*][1,4]oxazin-1-one (11ac)**

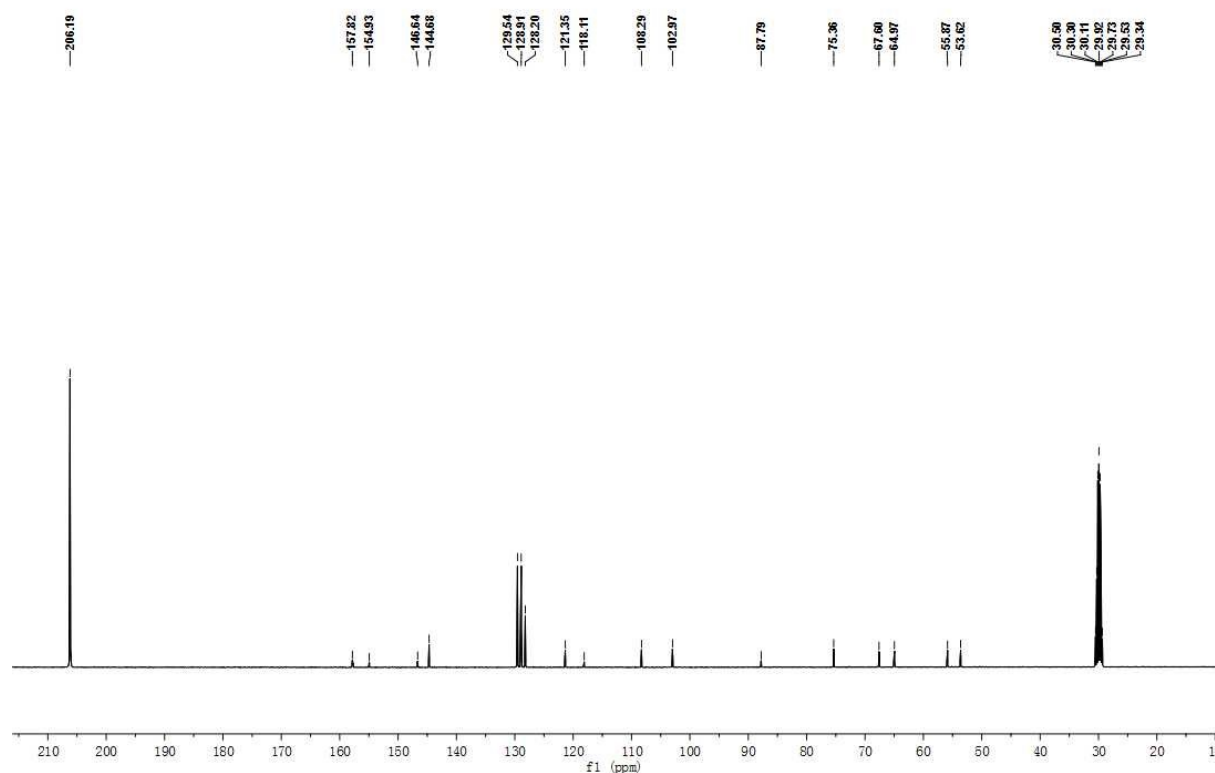

**(3*R*,3*aS*)-8-methyl-3-((trityloxy)methyl)-3*a*,4-dihydro-1*H*,3*H*-benzo[*b*]oxazolo[3,4-*d*][1,4]oxazin-1-one (11ad)**

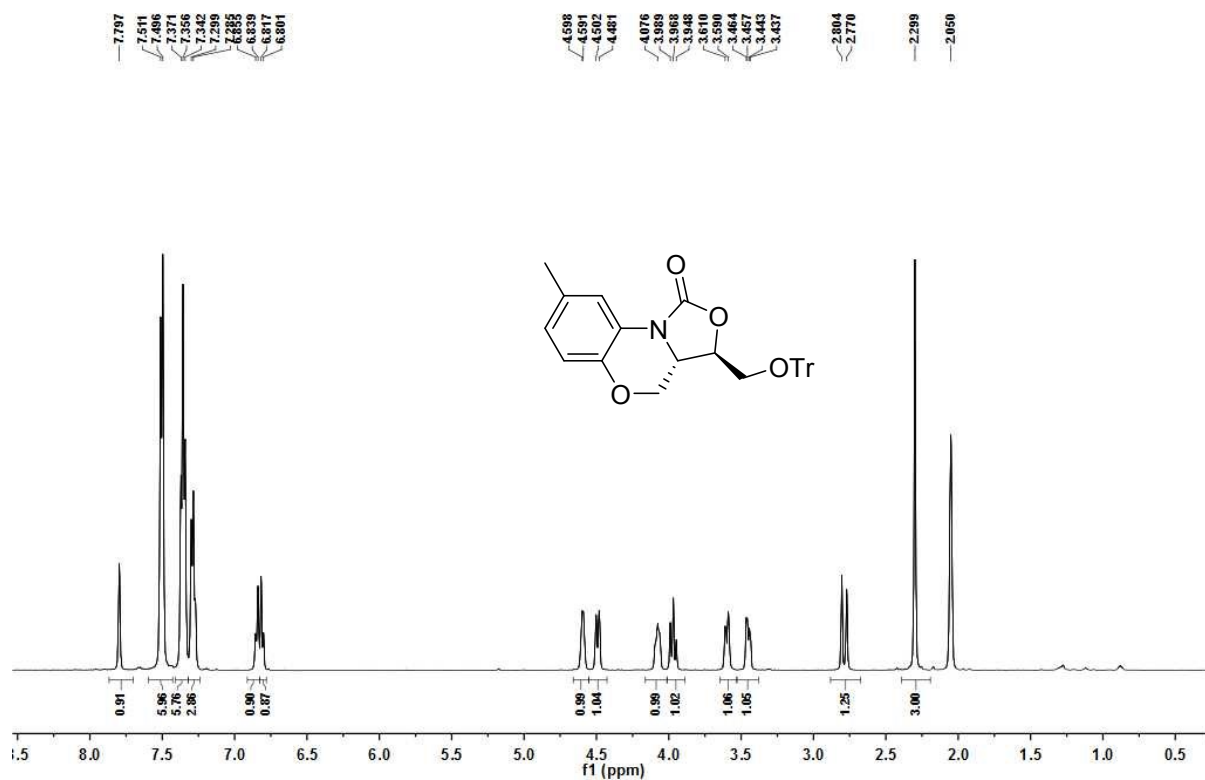

**(3*R*,3*aS*)-8-methyl-3-((trityloxy)methyl)-3*a*,4-dihydro-1*H*,3*H*-benzo[*b*]oxazolo[3,4-*d*][1,4]oxazin-1-one (11ad)**

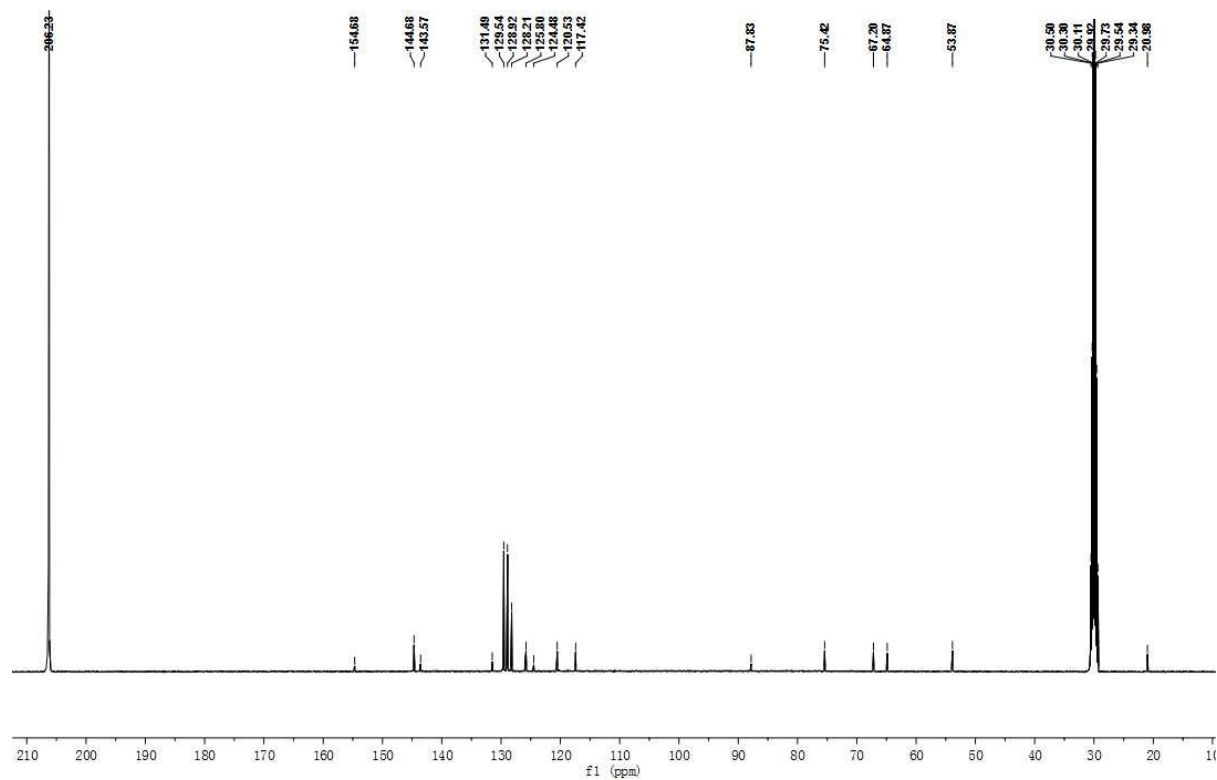

**(3*R*,3*aS*)-7-Methyl-3-((trityloxy)methyl)-3*a*,4-dihydro-1*H*,3*H*-benzo[*b*]oxazolo[3,4-*d*][1,4]oxazin-1-one (11ae)**

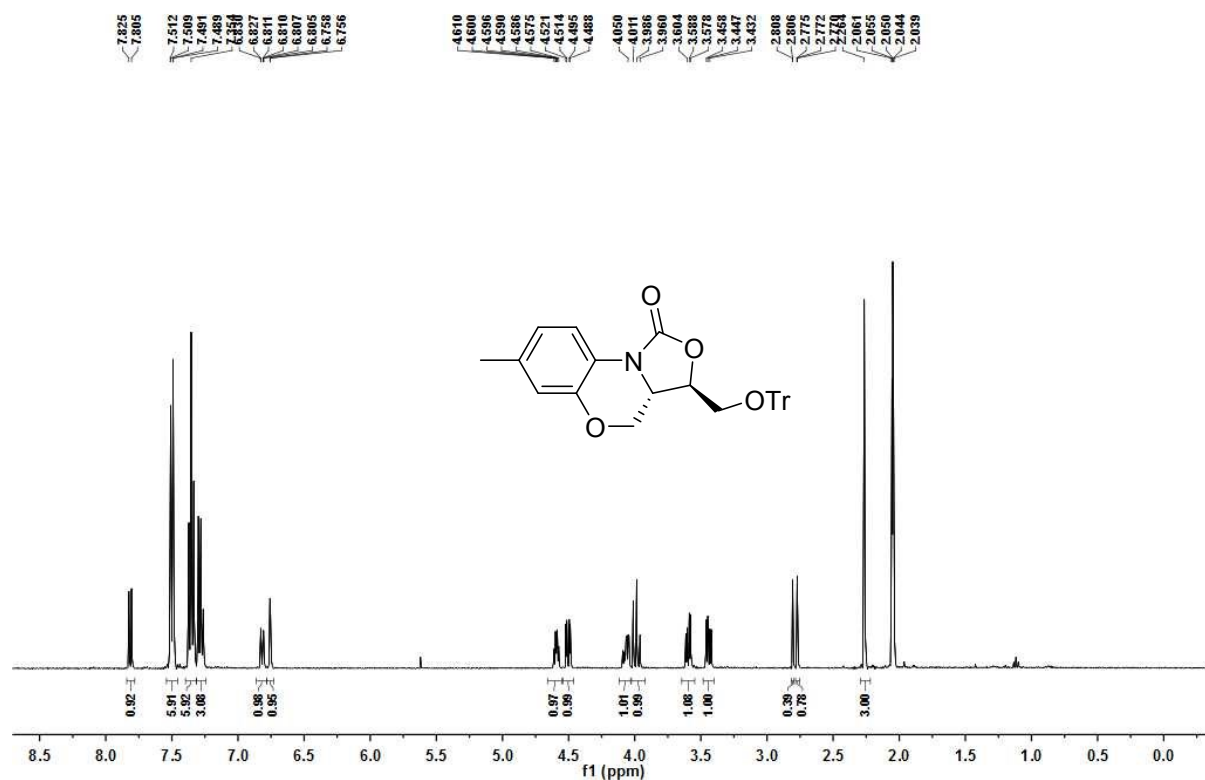

**(3*R*,3*aS*)-7-Methyl-3-((trityloxy)methyl)-3*a*,4-dihydro-1*H*,3*H*-benzo[*b*]oxazolo[3,4-*d*][1,4]oxazin-1-one (11ae)**

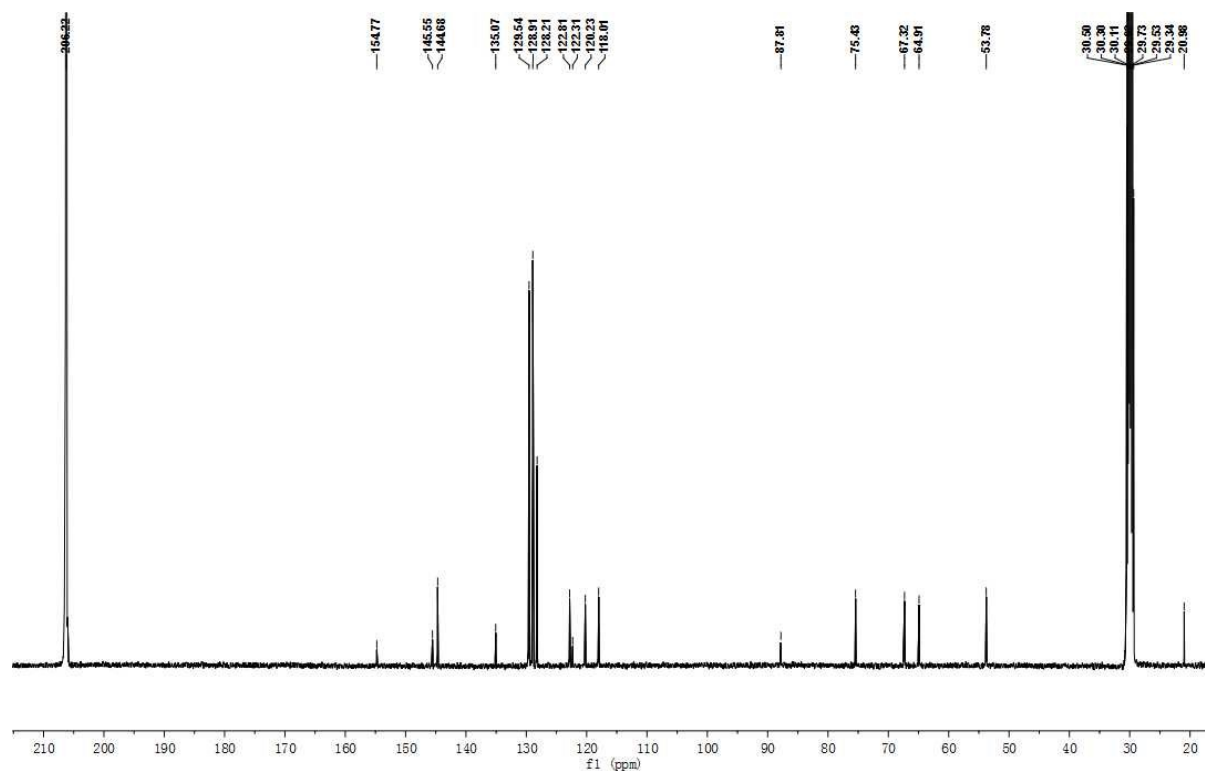

**(3*R*,3*aS*)-9-Bromo-3-((trityloxy)methyl)-3*a*,4-dihydro-1*H*,3*H*-benzo[*b*]oxazolo[3,4-*d*][1,4]oxazin-1-one (11af)**

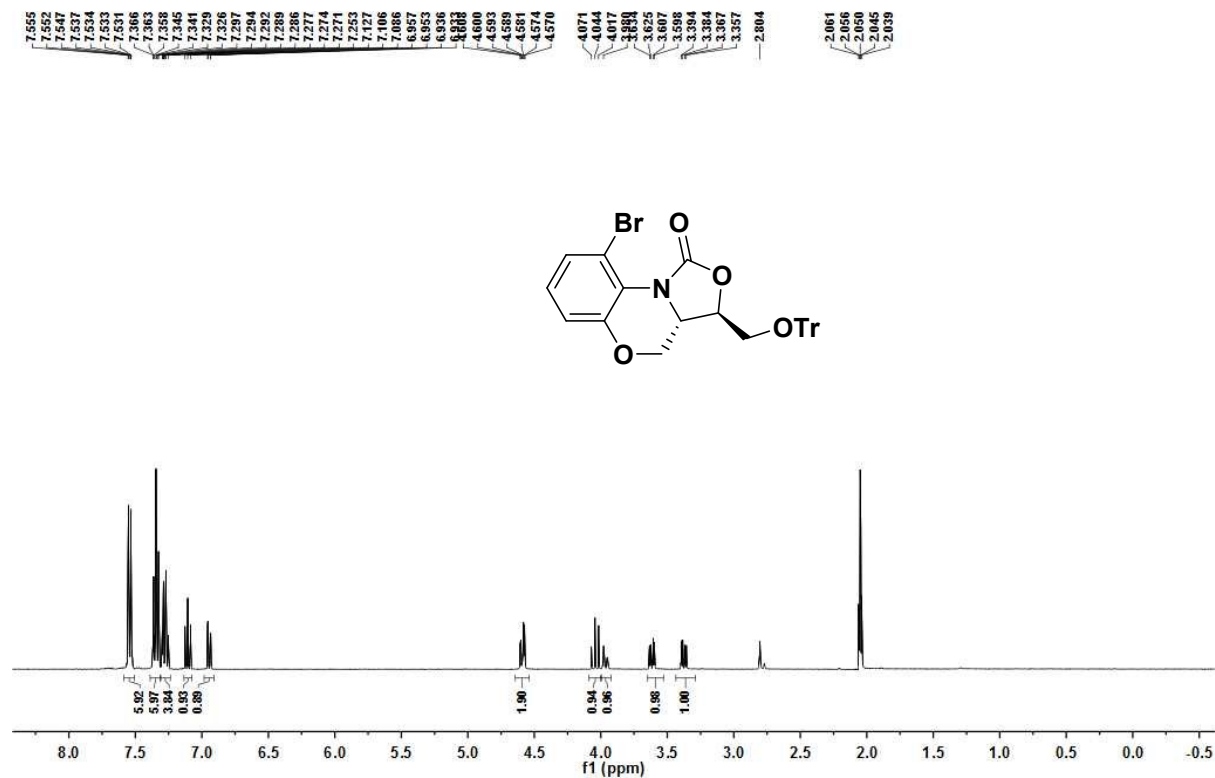

**(3*R*,3*aS*)-9-Bromo-3-((trityloxy)methyl)-3*a*,4-dihydro-1*H*,3*H*-benzo[*b*]oxazolo[3,4-*d*][1,4]oxazin-1-one (11af)**

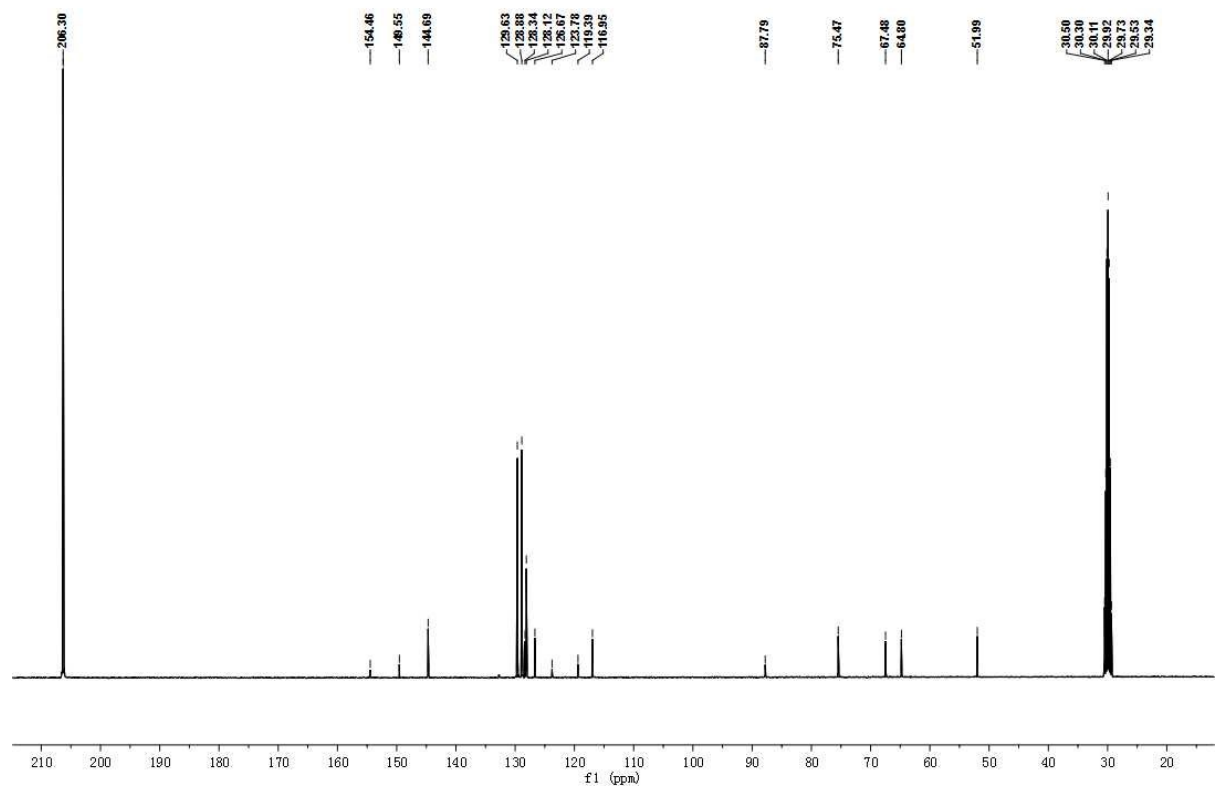

**(3*R*,3*aS*)-8-Bromo-3-((trityloxy)methyl)-3*a*,4-dihydro-1*H*,3*H*-benzo[*b*]oxazolo[3,4-*d*][1,4]oxazin-1-one (11ag)**

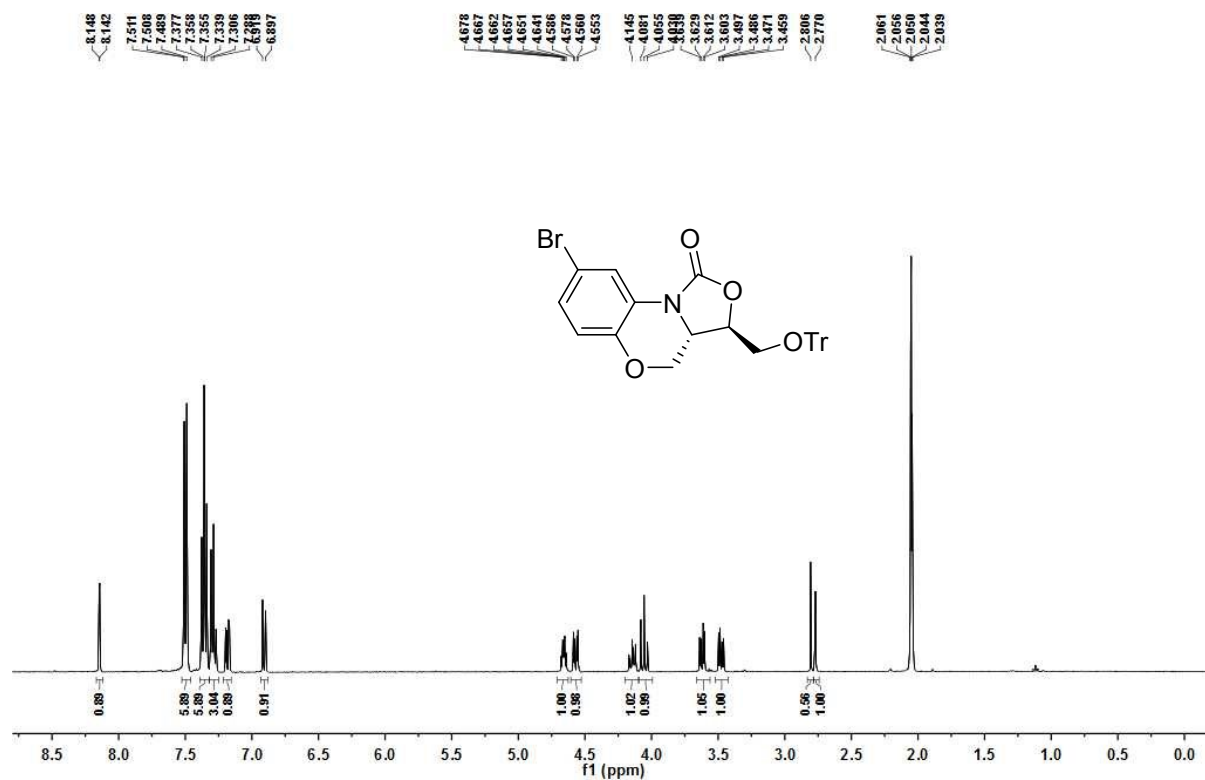

**(3*R*,3*aS*)-8-Bromo-3-((trityloxy)methyl)-3*a*,4-dihydro-1*H*,3*H*-benzo[*b*]oxazolo[3,4-*d*][1,4]oxazin-1-one (11ag)**

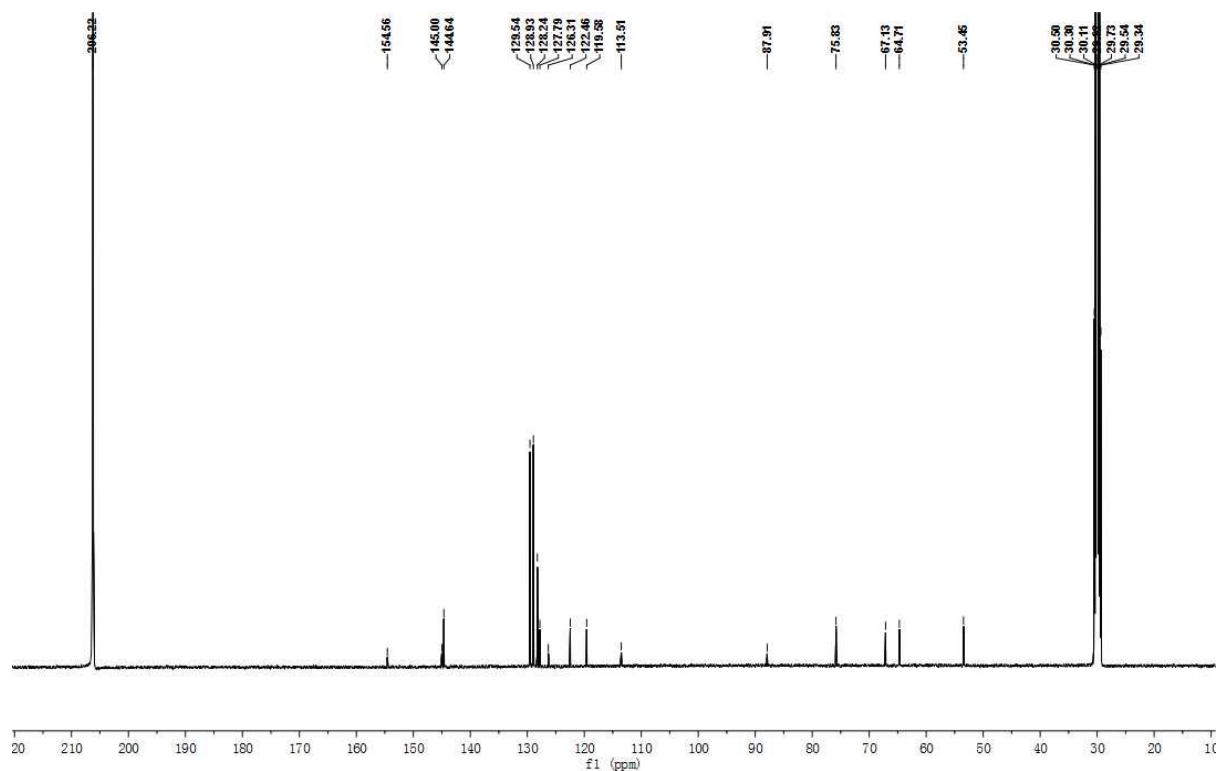

**(3*R*,3*aS*)-7-Bromo-3-((trityloxy)methyl)-3*a*,4-dihydro-1*H*,3*H*-benzo[*b*]oxazolo[3,4-*d*][1,4]oxazin-1-one (11ah)**

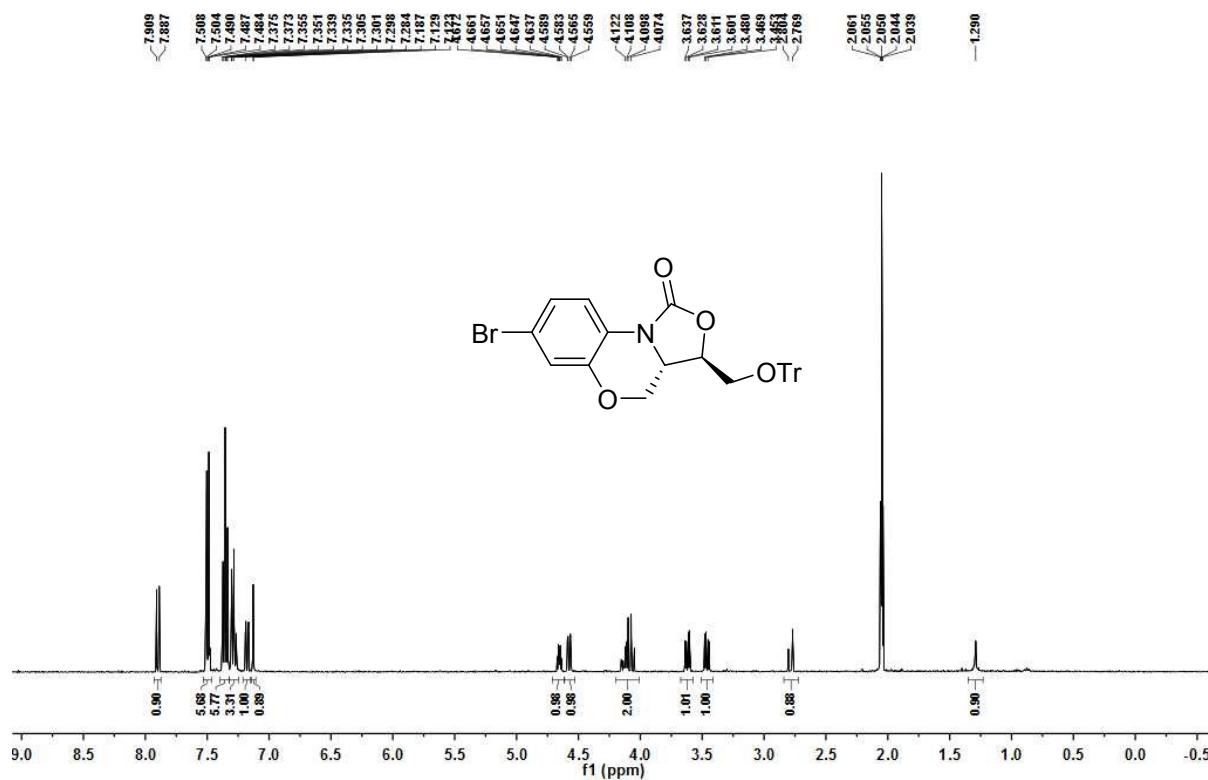

**(3*R*,3*aS*)-7-Bromo-3-((trityloxy)methyl)-3*a*,4-dihydro-1*H*,3*H*-benzo[*b*]oxazolo[3,4-*d*][1,4]oxazin-1-one (11ah)**

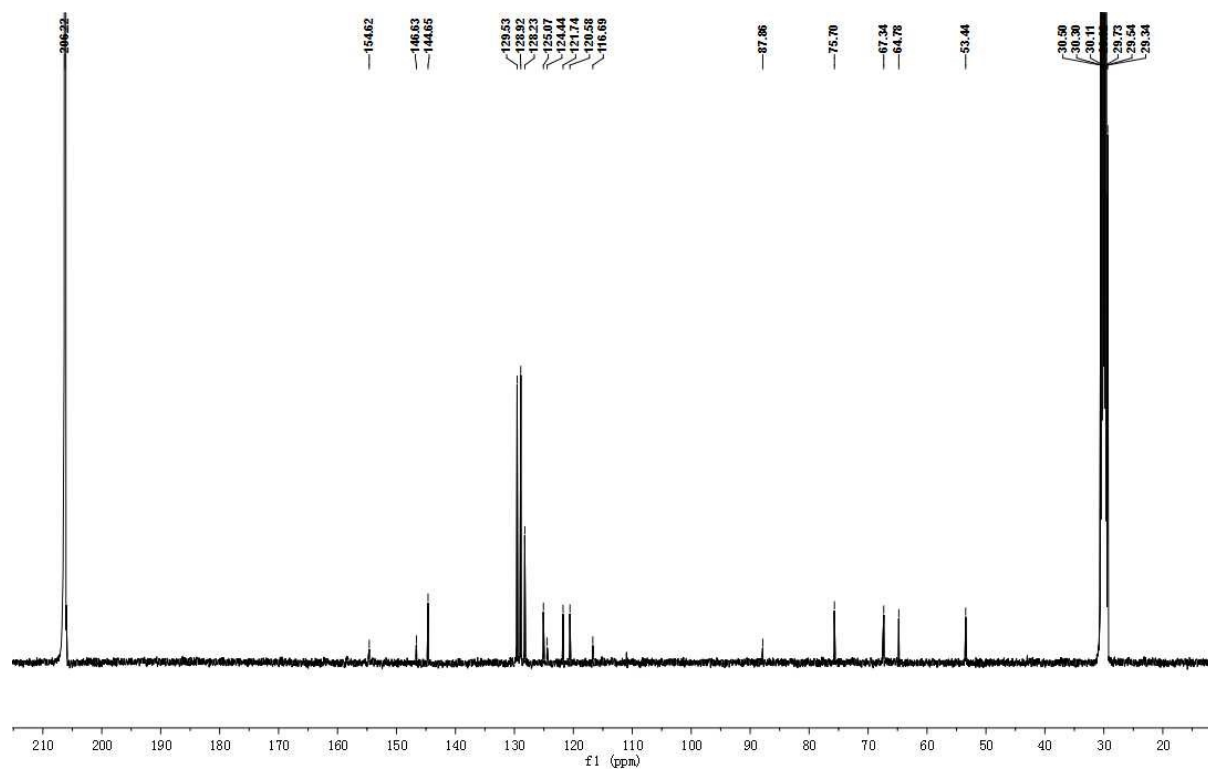

**(3*R*,3*aS*)-6-Bromo-3-((trityloxy)methyl)-3*a*,4-dihydro-1*H*,3*H*-benzo[*b*]oxazolo[3,4-*d*][1,4]oxazin-1-one (11ai)**

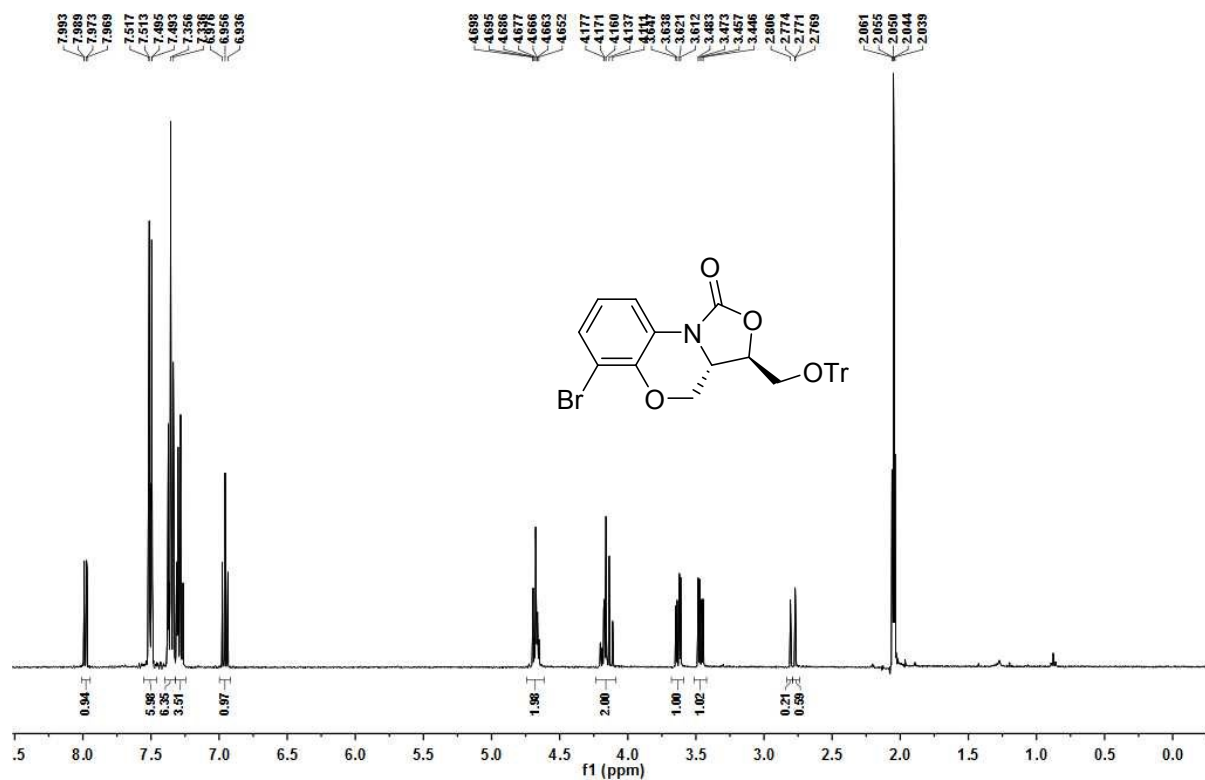

**(3*R*,3*aS*)-6-Bromo-3-((trityloxy)methyl)-3*a*,4-dihydro-1*H*,3*H*-benzo[*b*]oxazolo[3,4-*d*][1,4]oxazin-1-one (11ai)**

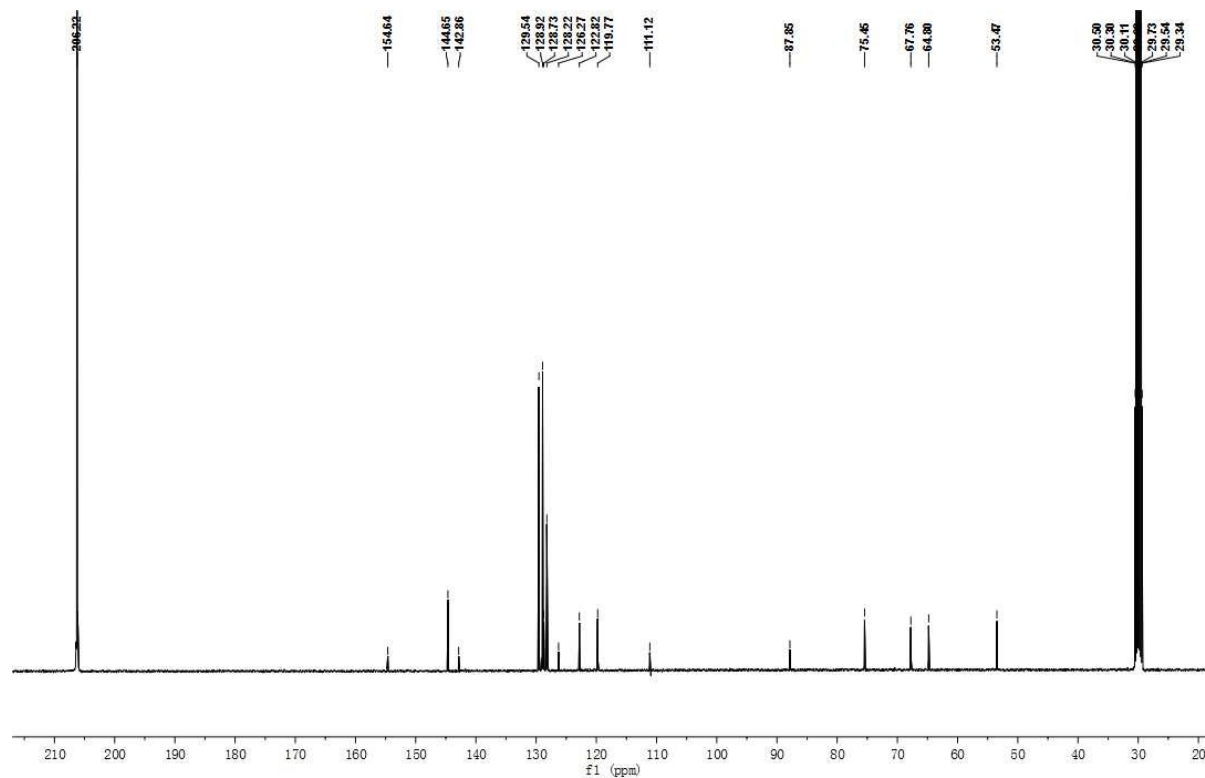

**(3*R*,3*aS*)-8-Fluoro-3-((trityloxy)methyl)-3*a*,4-dihydro-1*H*,3*H*-benzo[*b*]oxazolo[3,4-*d*][1,4]oxazin-1-one (11aj)**

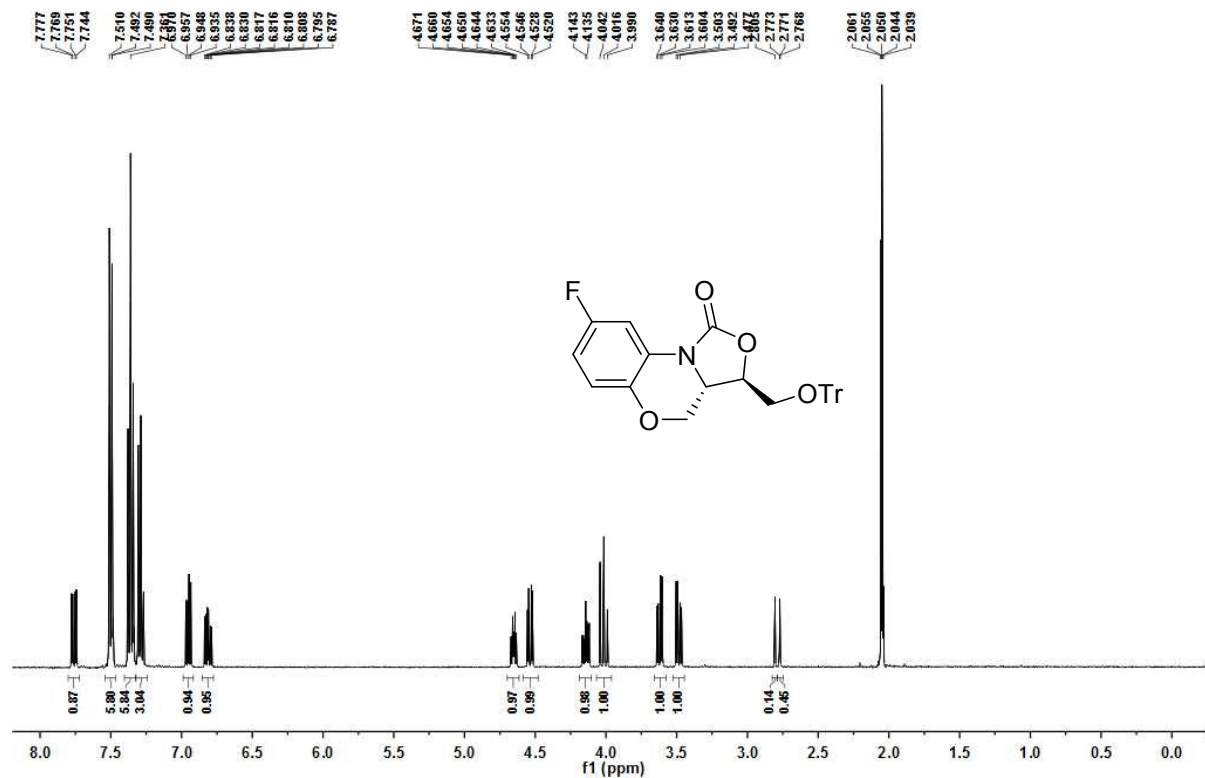

**(3*R*,3*aS*)-8-Fluoro-3-((trityloxy)methyl)-3*a*,4-dihydro-1*H*,3*H*-benzo[*b*]oxazolo[3,4-*d*][1,4]oxazin-1-one (11aj)**

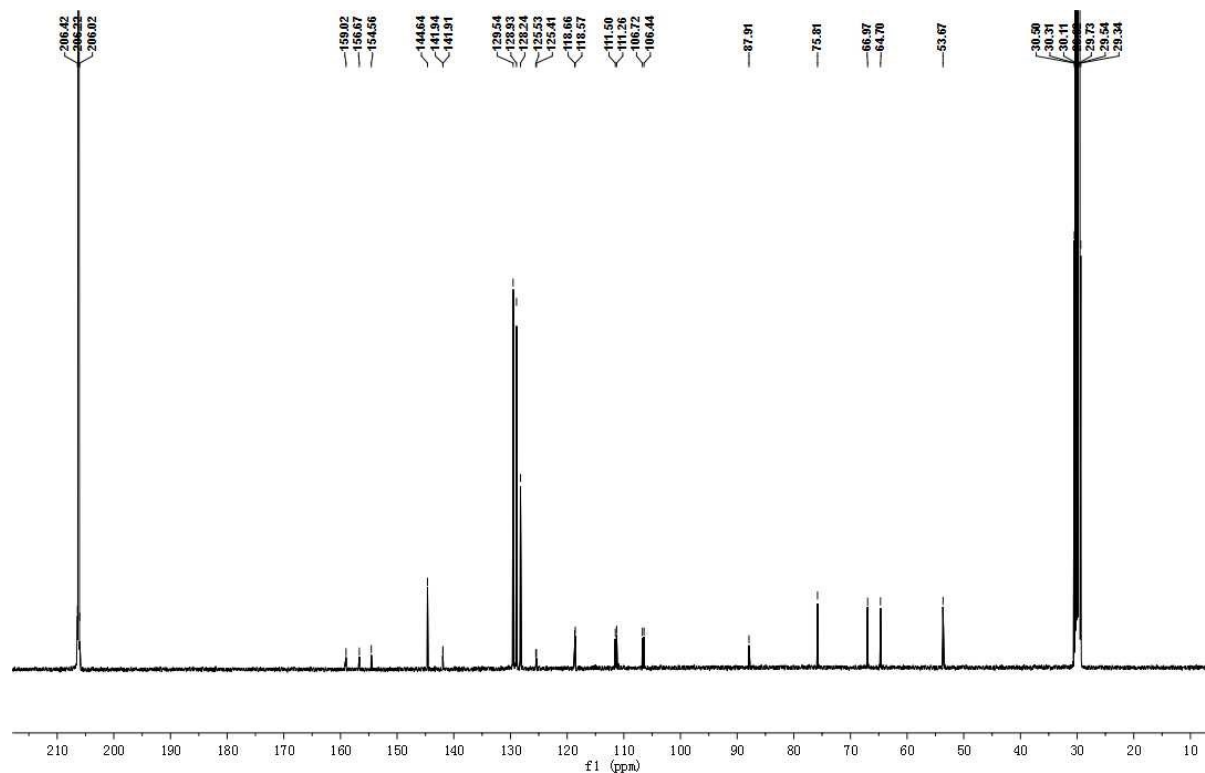

**(3*R*,3*aS*)-7-Fluoro-3-((trityloxy)methyl)-3*a*,4-dihydro-1*H*,3*H*-benzo[*b*]oxazolo[3,4-*d*][1,4]oxazin-1-one (11ak)**

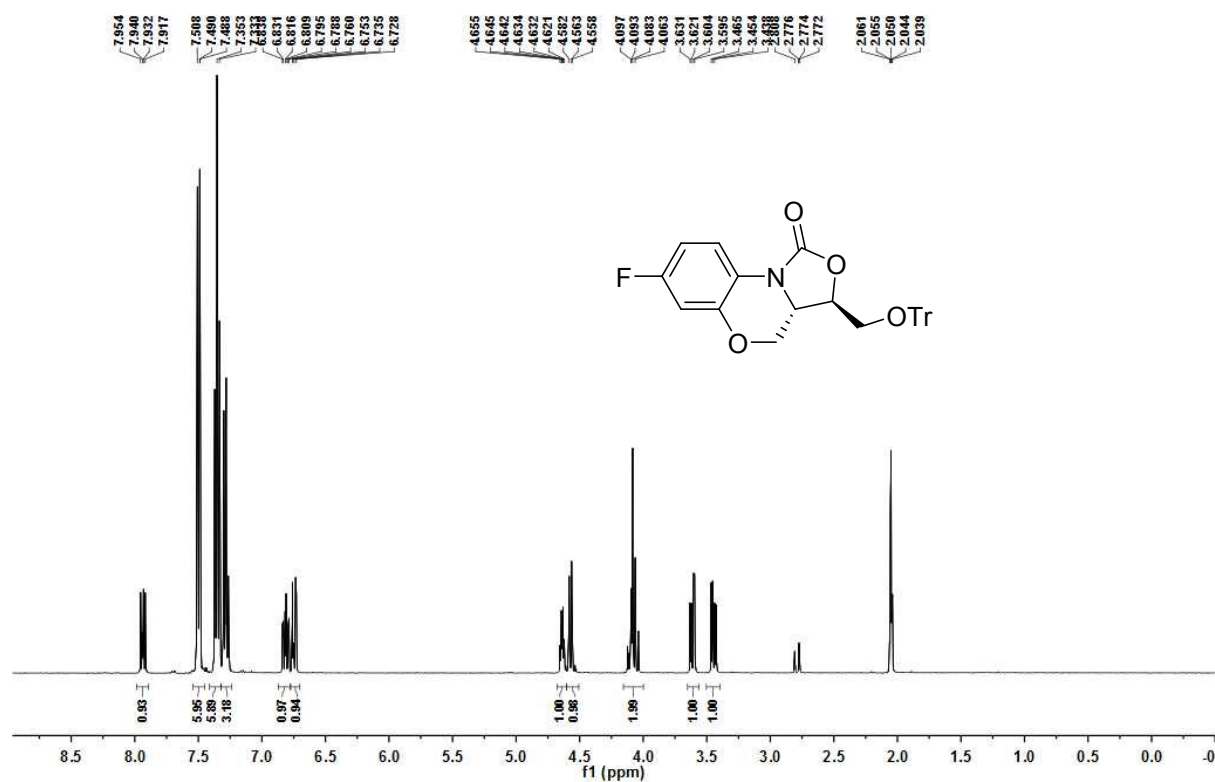

**(3*R*,3*aS*)-7-Fluoro-3-((trityloxy)methyl)-3*a*,4-dihydro-1*H*,3*H*-benzo[*b*]oxazolo[3,4-*d*][1,4]oxazin-1-one (11ak)**

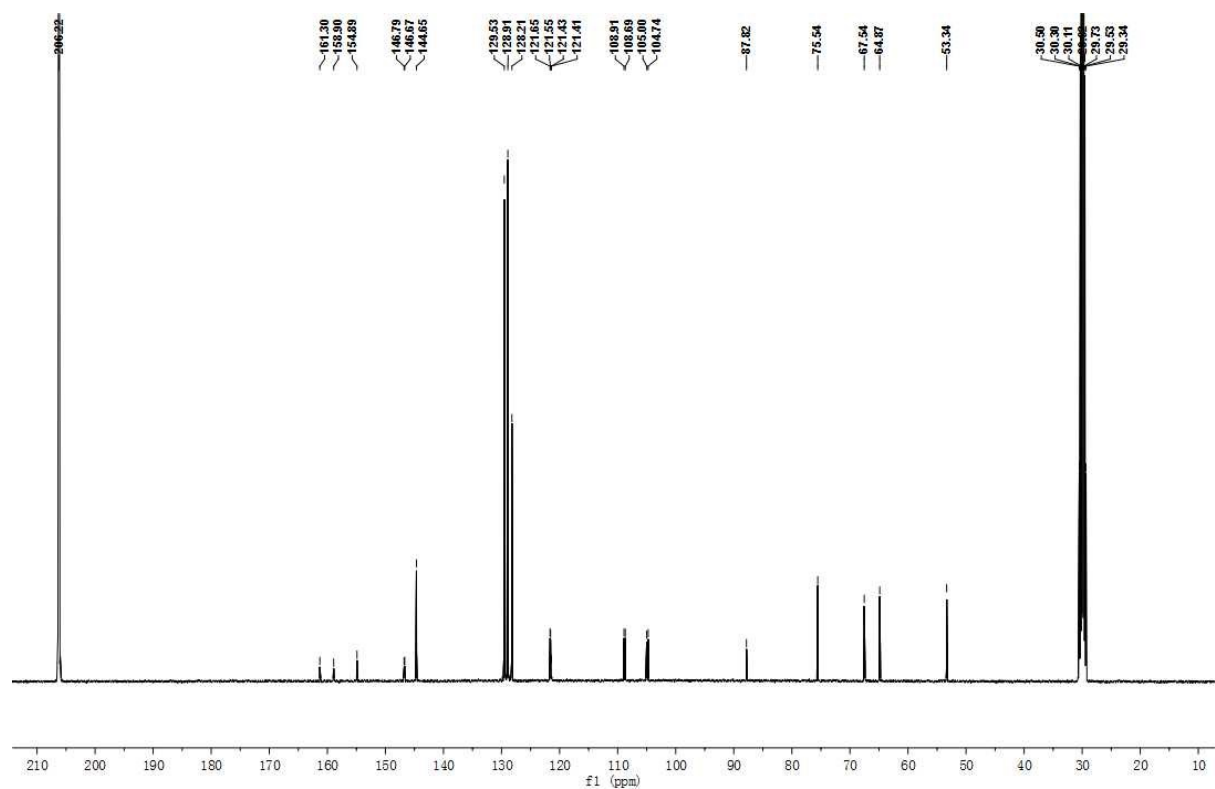

**(3*R*,3*aS*)-6,8-Dichloro-3-((trityloxy)methyl)-3*a*,4-dihydro-1*H*,3*H*-benzo[*b*]oxazolo[3,4-*d*][1,4]oxazin-1-one (11a)**

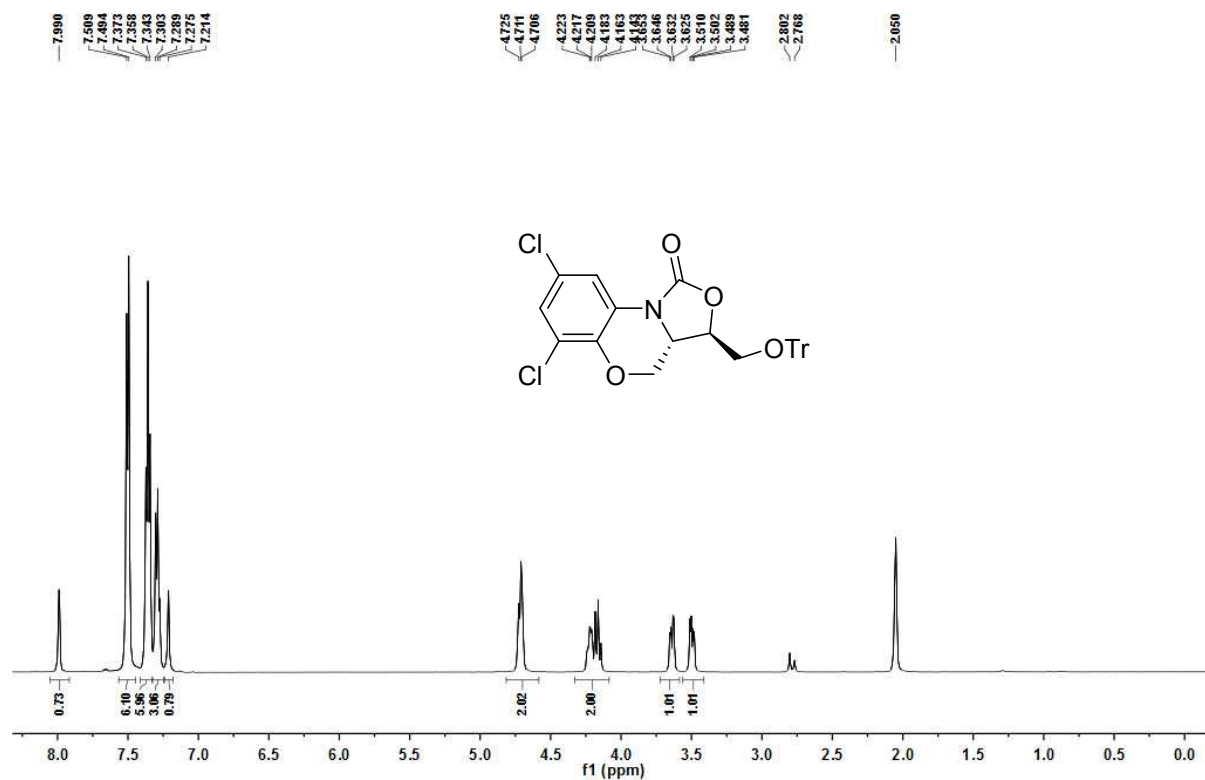

**(3*R*,3*aS*)-6,8-Dichloro-3-((trityloxy)methyl)-3*a*,4-dihydro-1*H*,3*H*-benzo[*b*]oxazolo[3,4-*d*][1,4]oxazin-1-one (11a)**

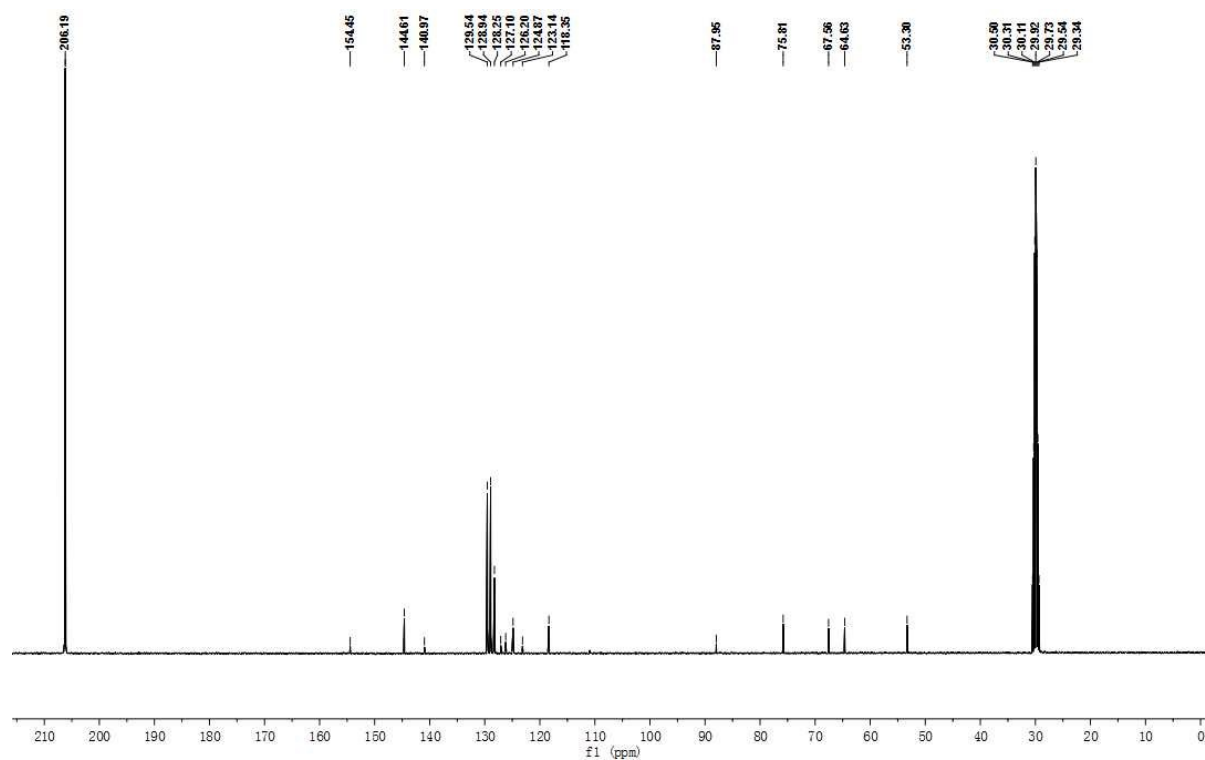

**(3*R*,3*aS*)-7,8-Difluoro-3-((trityloxy)methyl)-3*a*,4-dihydro-1*H*,3*H*-benzo[*b*]oxazolo[3,4-*d*][1,4]oxazin-1-one (11am)**

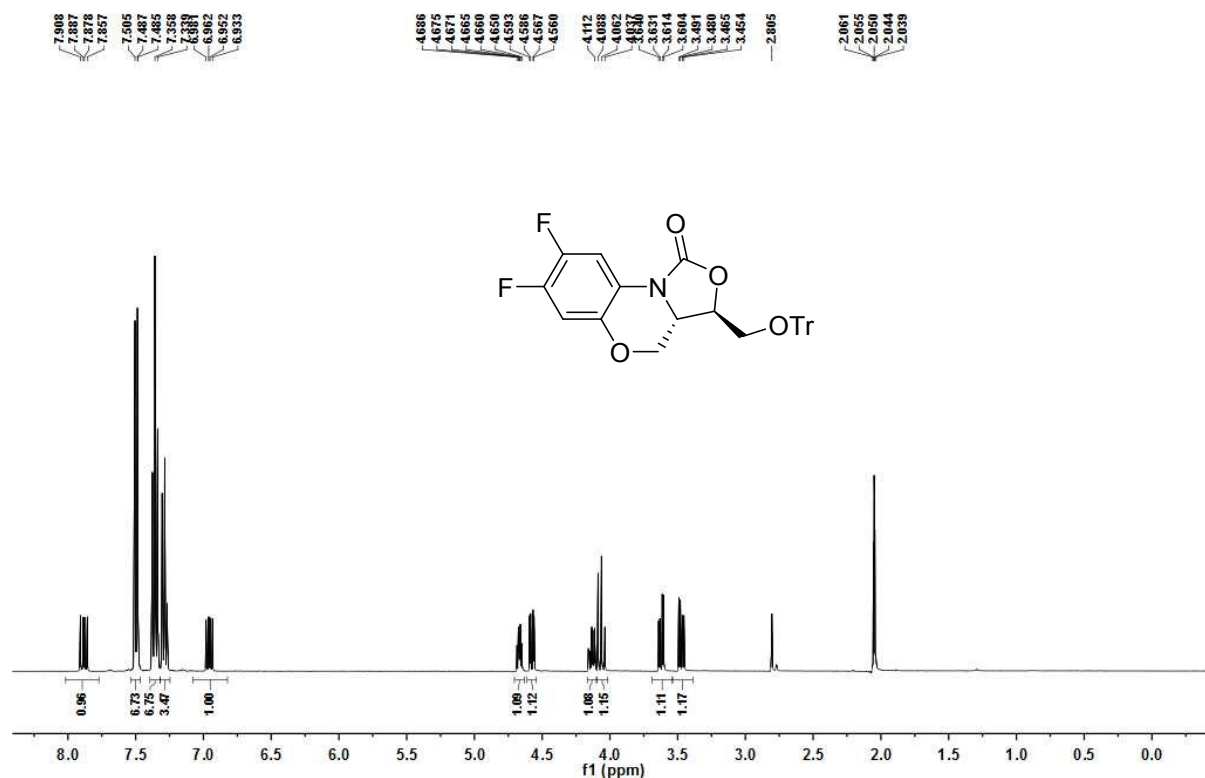

**(3*R*,3*aS*)-7,8-Difluoro-3-((trityloxy)methyl)-3*a*,4-dihydro-1*H*,3*H*-benzo[*b*]oxazolo[3,4-*d*][1,4]oxazin-1-one (11am)**

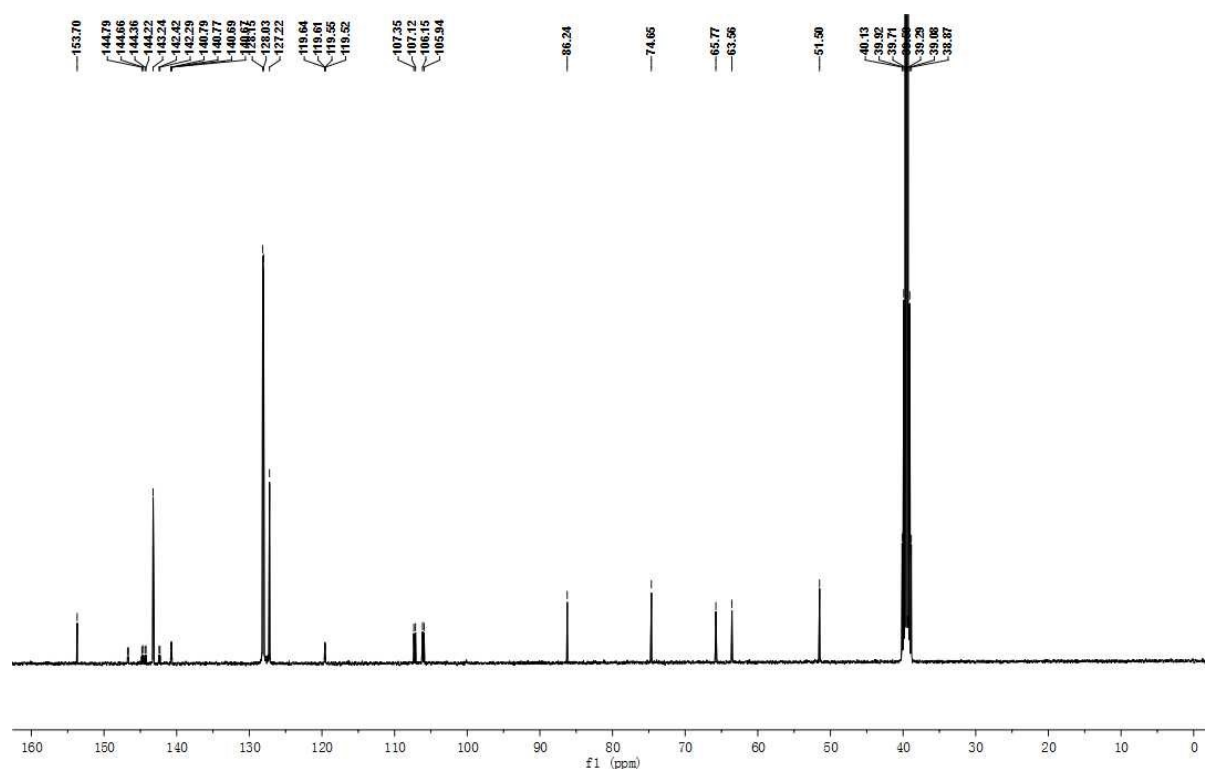

Chemical structure of compound 10: COc1cc2cc3cc(F)cc(Br)c3oc2n1COC(F)(F)F

<sup>1</sup>H NMR spectrum (CDCl<sub>3</sub>) of compound 10. The x-axis represents the chemical shift in ppm (f<sub>1</sub>), ranging from 8.5 to -0.5. The spectrum shows several peaks corresponding to the structure, with integration values indicated below the peaks.

Chemical structure of compound 10 is shown above the spectrum.

13C NMR spectrum of compound 10. The x-axis is labeled 'f1 (ppm)' and ranges from 20 to 210. The spectrum shows several sharp peaks. A list of chemical shifts (ppm) is provided above the peaks: 206.40, 155.25, 154.42, 152.99, 144.61, 142.57, 142.55, 128.53, 128.94, 128.25, 125.29, 125.19, 121.58, 107.51, 107.21, 102.73, 102.50, 87.95, 76.00, 67.10, 64.62, 53.45, 30.50, 30.31, 30.11, 29.73, 29.54, 29.34. The peak at 206.40 ppm is the most intense.

**(3*R*,3*aS*)-8-Nitro-3-((trityloxy)methyl)-3*a*,4-dihydro-1*H*,3*H*-benzo[*b*]oxazolo[3,4-*d*][1,4]oxazin-1-one (11ao)**

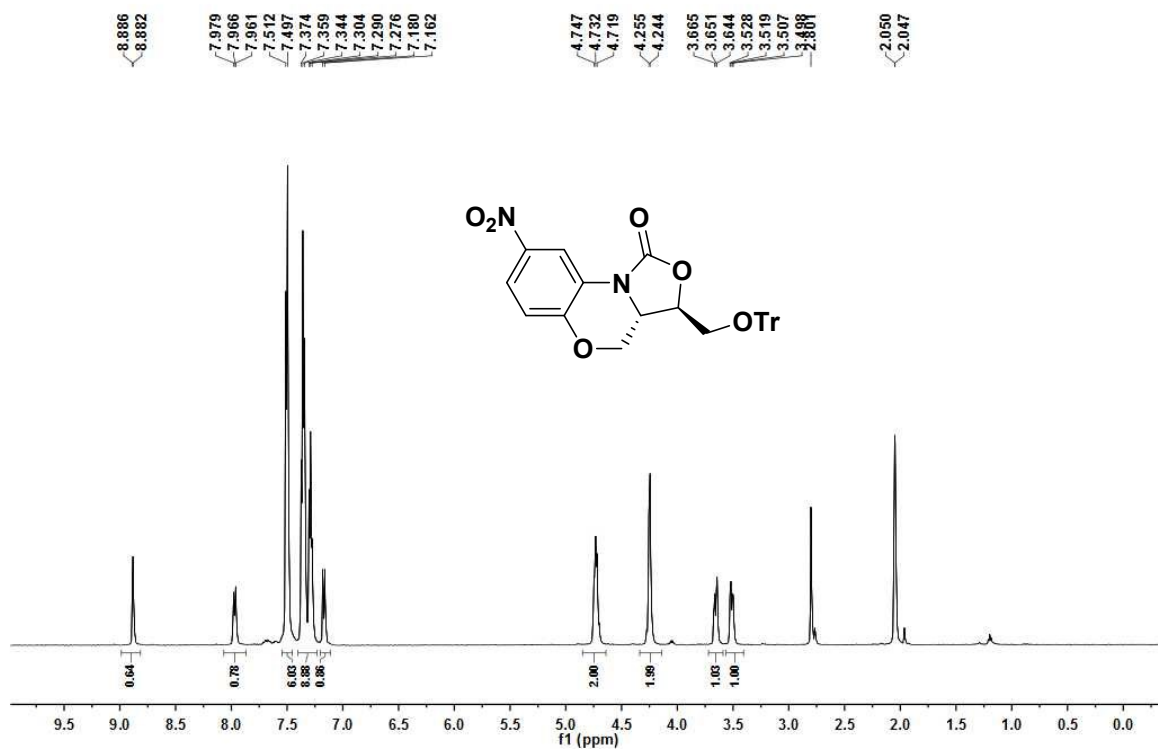

**(3*R*,3*aS*)-8-Nitro-3-((trityloxy)methyl)-3*a*,4-dihydro-1*H*,3*H*-benzo[*b*]oxazolo[3,4-*d*][1,4]oxazin-1-one (11ao)**

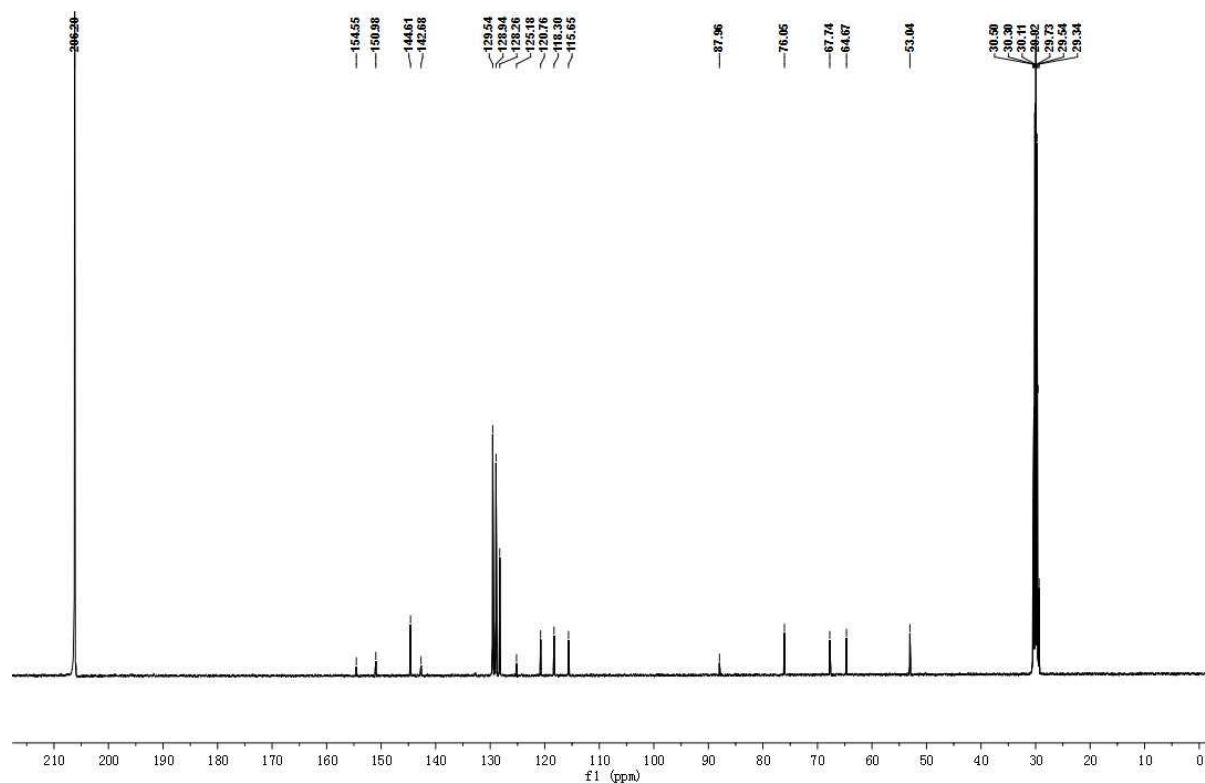

**(3*R*,3*aS*)-7-Nitro-3-((trityloxy)methyl)-3*a*,4-dihydro-1*H*,3*H*-benzo[*b*]oxazolo[3,4-*d*][1,4]oxazin-1-one (11ap)**

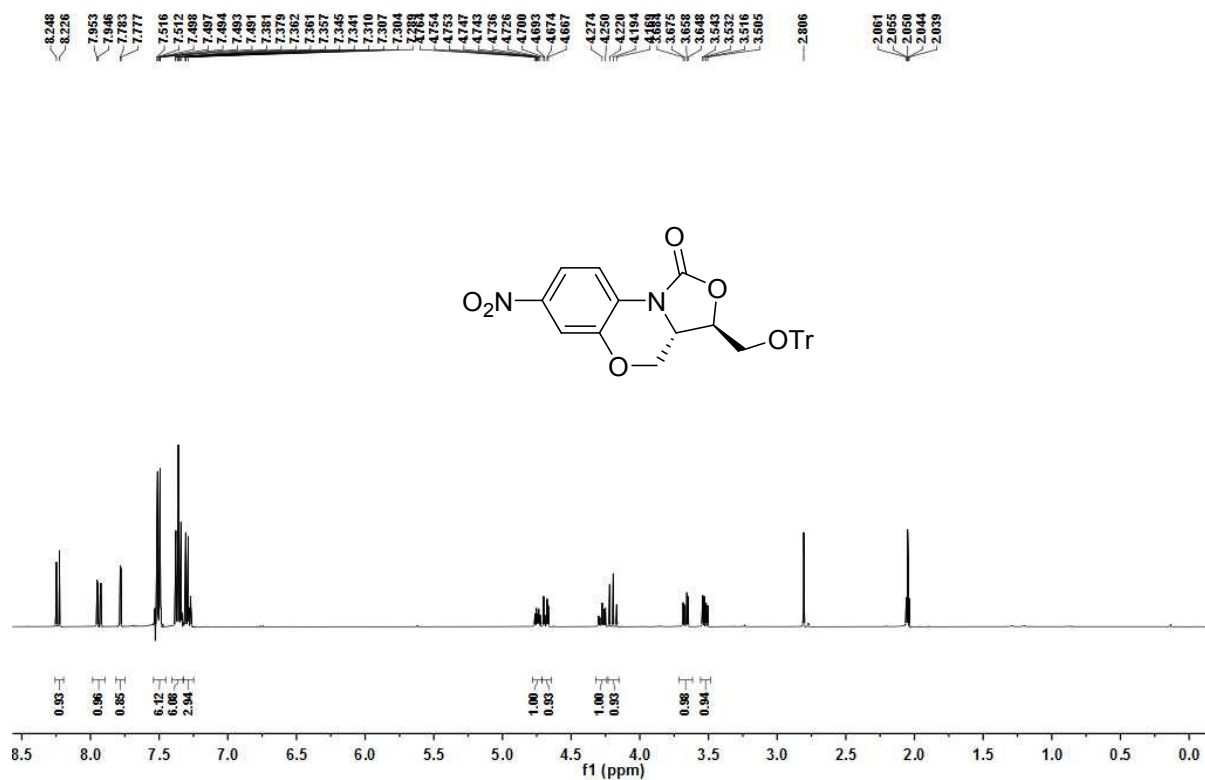

**(3*R*,3*aS*)-7-Nitro-3-((trityloxy)methyl)-3*a*,4-dihydro-1*H*,3*H*-benzo[*b*]oxazolo[3,4-*d*][1,4]oxazin-1-one (11ap)**

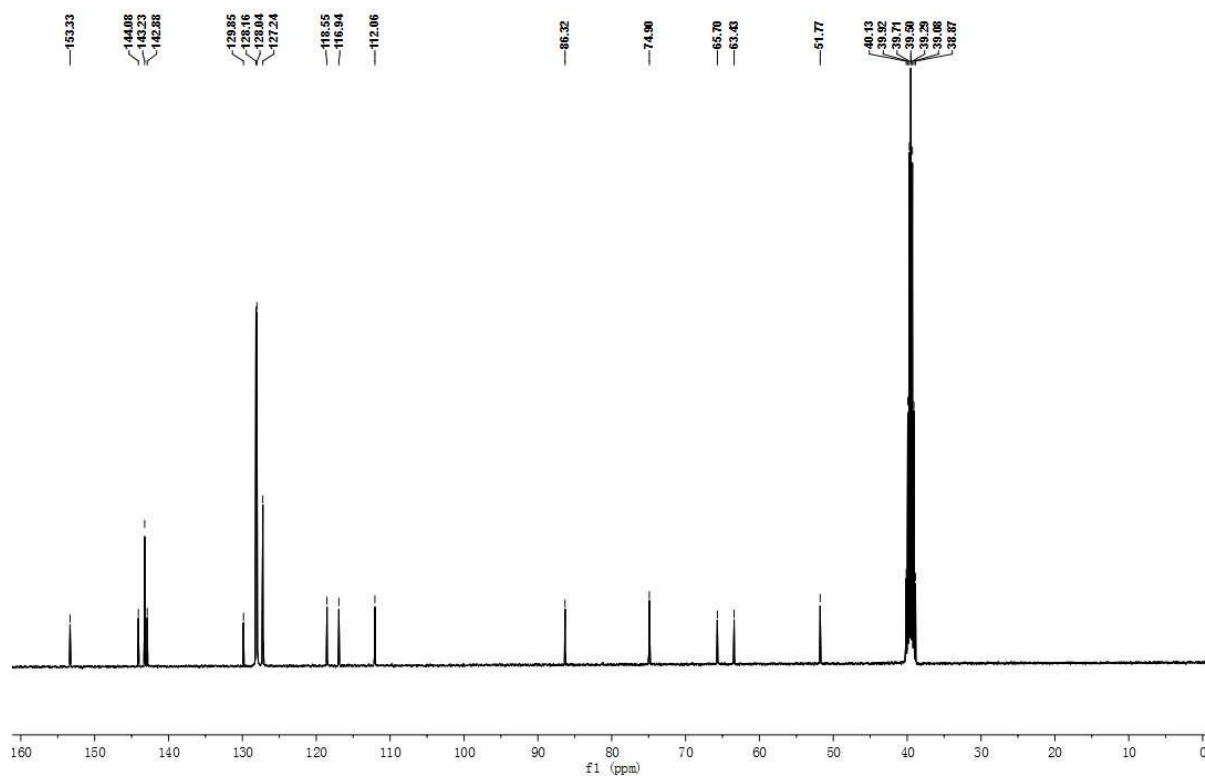

**(3*R*,3*aS*)-7-(3-Oxomorpholino)-3-((trityloxy)methyl)-3*a*,4-dihydro-1*H*,3*H*-benzo[*b*]oxazolo[3,4-*d*][1,4]oxazin-1-one (11aq)**

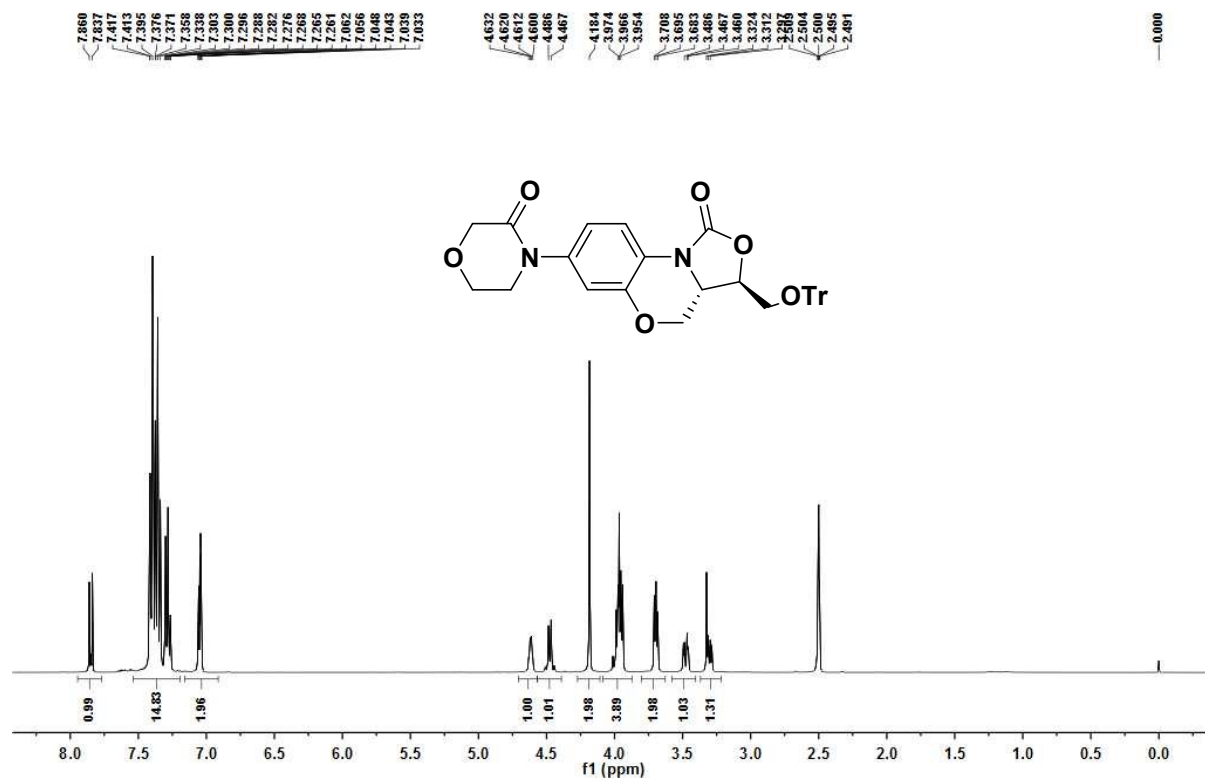

**(3*R*,3*aS*)-7-(3-Oxomorpholino)-3-((trityloxy)methyl)-3*a*,4-dihydro-1*H*,3*H*-benzo[*b*]oxazolo[3,4-*d*][1,4]oxazin-1-one (11aq)**

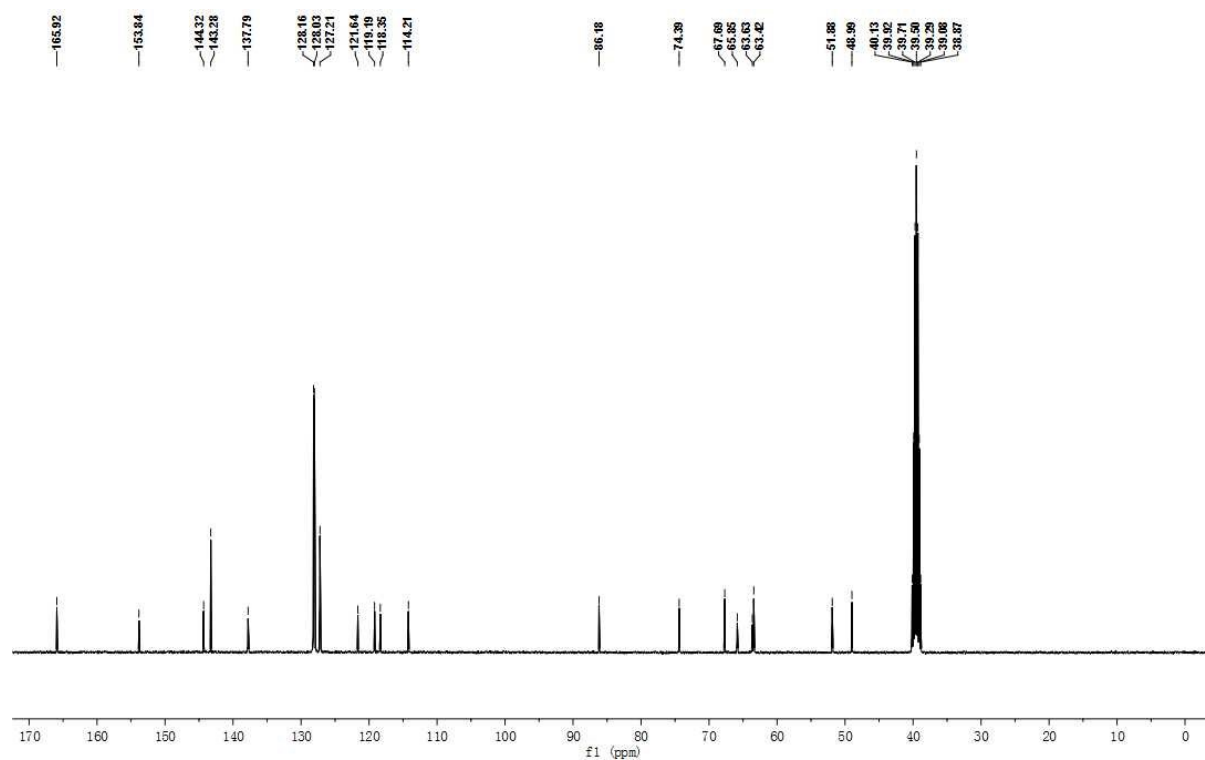

**(3*R*,3*aS*)-7-Bromo-3-(hydroxymethyl)-3*a*,4-dihydro-1*H*,3*H*-benzo[*b*]oxazolo[3,4-*d*][1,4]oxazin-1-one (12)**

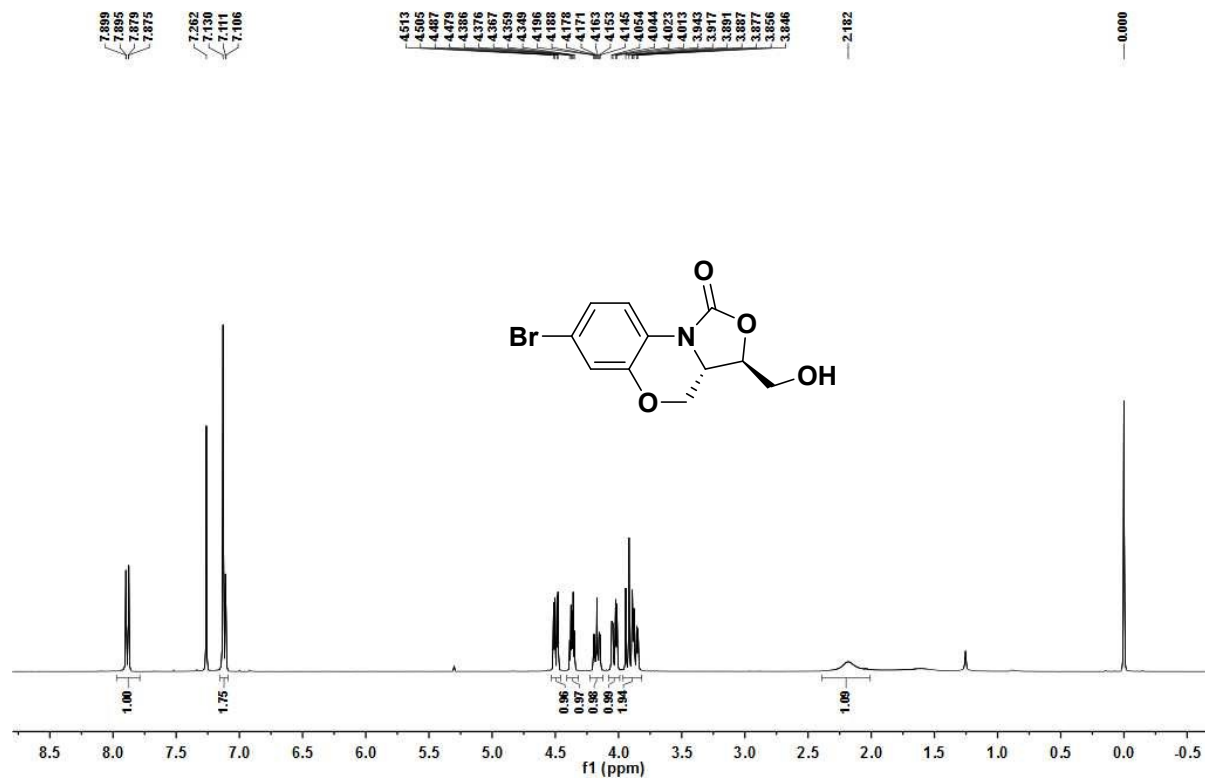

**(3*R*,3*aS*)-7-Bromo-3-(hydroxymethyl)-3*a*,4-dihydro-1*H*,3*H*-benzo[*b*]oxazolo[3,4-*d*][1,4]oxazin-1-one (12)**

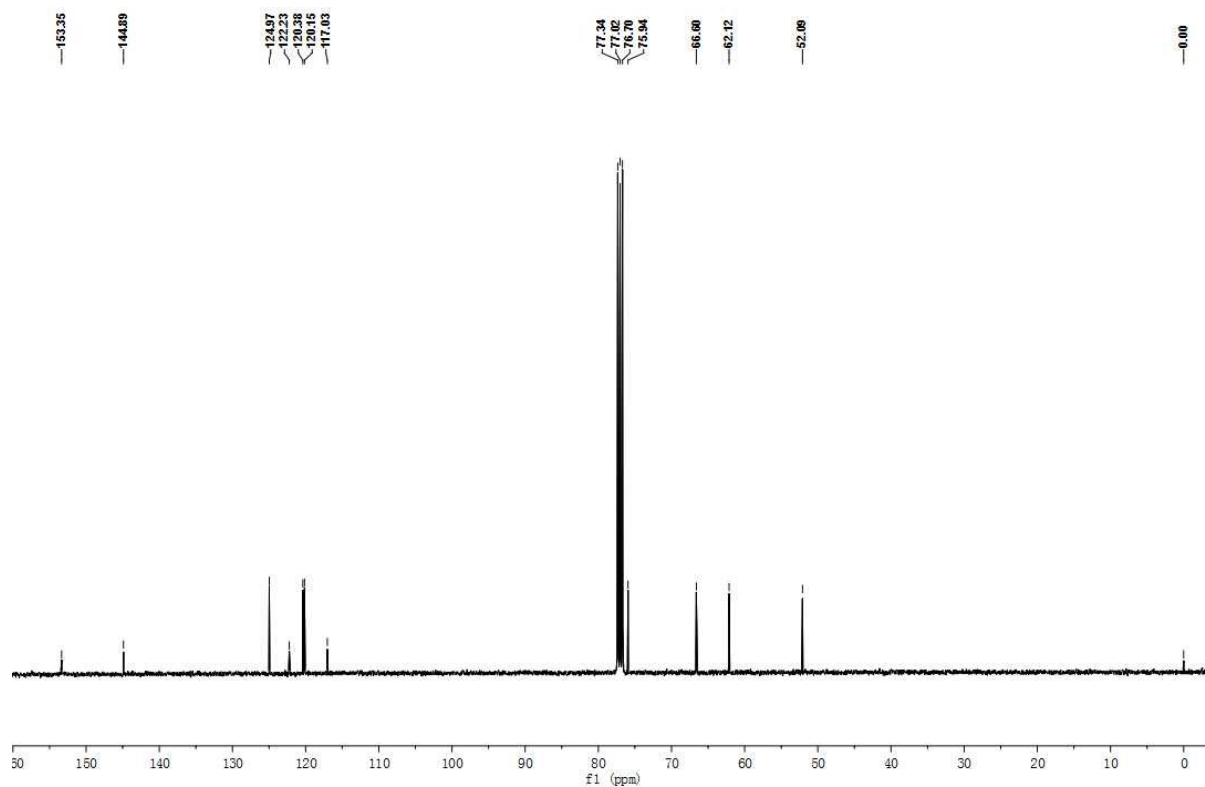

**(3*R*,3*aS*)-3-(Hydroxymethyl)-7-(4,4,5,5-tetramethyl-1,3,2-dioxaborolan-2-yl)-3*a*,4-dihydro-1*H*,3*H*-benzo[*b*]oxazolo[3,4-*d*][1,4]oxazin-1-one (13)**

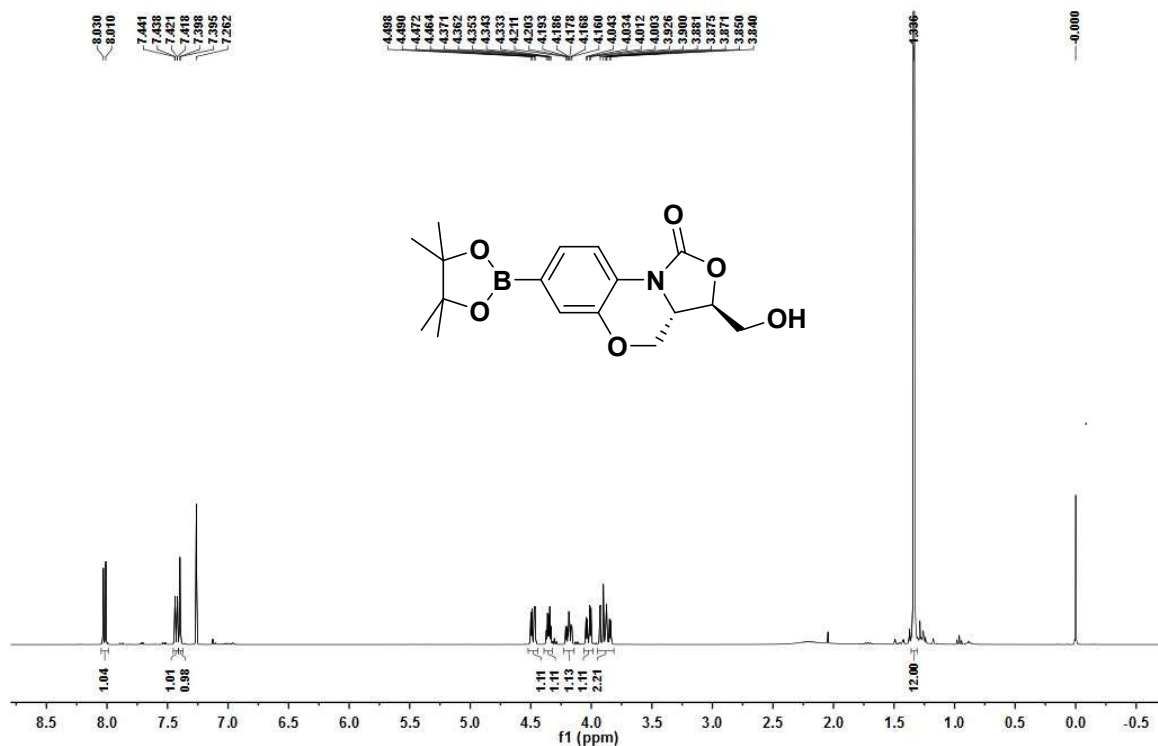

**(3*R*,3*aS*)-3-(Hydroxymethyl)-7-(4,4,5,5-tetramethyl-1,3,2-dioxaborolan-2-yl)-3*a*,4-dihydro-1*H*,3*H*-benzo[*b*]oxazolo[3,4-*d*][1,4]oxazin-1-one (13)**

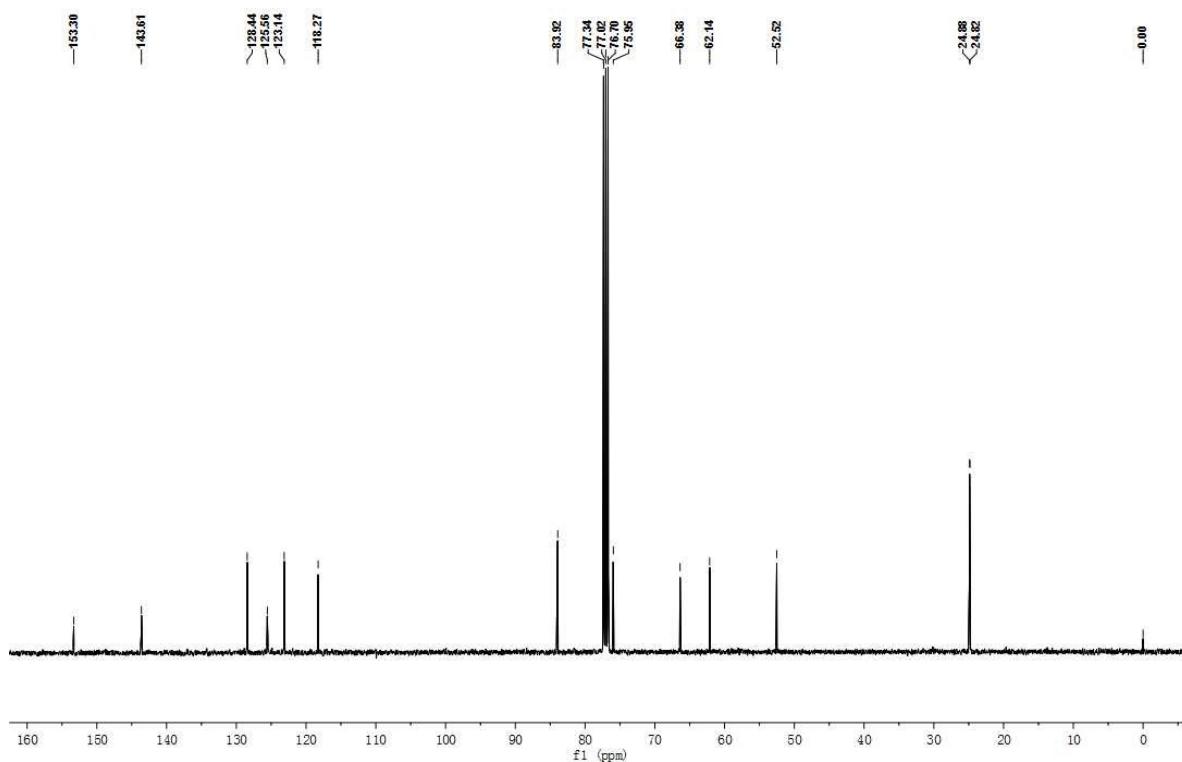

## Chiral HPLC chromatograms

### Sample Information

**±-9a**

OD-H (DAICEL, 5 $\mu$ m, 4.6mm  $\phi$ ×250 mmL)

Hexane-EtOH = 90: 10, 20°C, 215 nm, 1 mL/min, 20 $\mu$ L

### Chromatogram

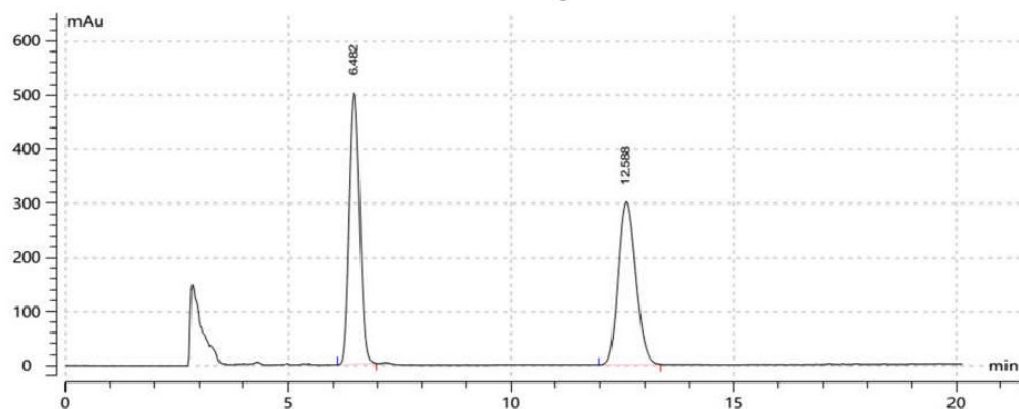

### Peak Table

| Peak# | Rt (min) | A (mAu*s)  | W (min) | W <sub>1/2</sub> (min) | H (mAu) | A%     |
|-------|----------|------------|---------|------------------------|---------|--------|
| 1     | 6.482    | 8225.14119 | 0.435   | 0.259                  | 501.638 | 49.585 |
| 2     | 12.588   | 8362.78191 | 0.728   | 0.436                  | 301.143 | 50.415 |

### Sample Information

**9a**

OD-H (DAICEL, 5 $\mu$ m, 4.6mm  $\phi$ ×250 mmL)

Hexane-EtOH = 90: 10, 20°C, 215 nm, 1 mL/min, 20 $\mu$ L

### Chromatogram

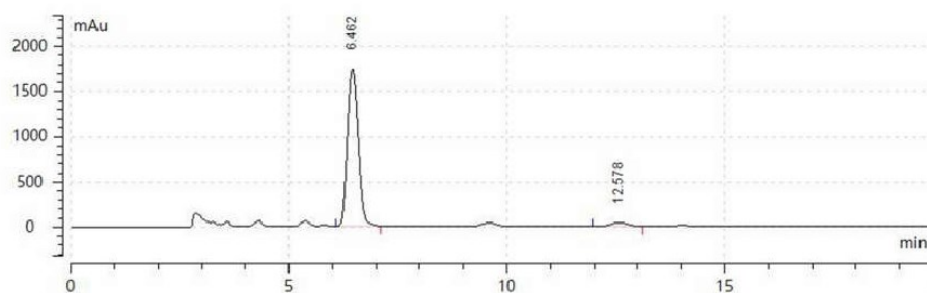

### Peak Table

| Peak# | Rt (min) | A (mAu*s)   | W (min) | W <sub>1/2</sub> (min) | H (mAu)  | A%     |
|-------|----------|-------------|---------|------------------------|----------|--------|
| 1     | 6.462    | 30308.45037 | 0.453   | 0.274                  | 1749.118 | 96.486 |
| 2     | 12.578   | 1103.70493  | 0.673   | 0.414                  | 41.753   | 3.514  |

# Sample Information

**9b**

OD-H (DAICEL, 5 $\mu$ m, 4.6mm  $\phi$ ×250 mmL)

Hexane-EtOH = 90: 10, 20°C, 215 nm, 1 mL/min, 20 $\mu$ L

## Chromatogram

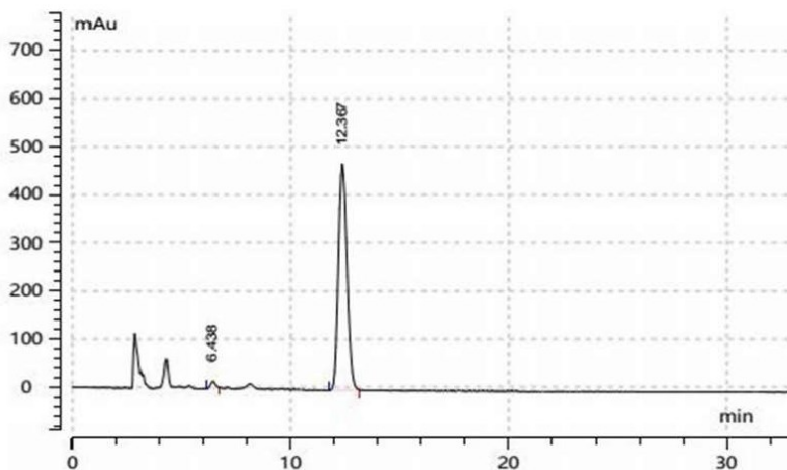

Peak Table

| Peak# | Rt (min) | A (mAu*s)   | W (min) | W <sub>1/2</sub> (min) | H (mAu) | A%     |
|-------|----------|-------------|---------|------------------------|---------|--------|
| 1     | 6.438    | 207.95435   | 0.375   | 0.238                  | 13.960  | 1.581  |
| 2     | 12.367   | 12947.79306 | 0.729   | 0.434                  | 469.867 | 98.419 |

# Sample Information

**±-9c**

OZ-H (DAICEL, 5 $\mu$ m, 4.6mm  $\phi$ ×250 mmL)

hexane/ isopropanol = 97: 3, 20°C, 220 nm, 1 mL/min, 20 $\mu$ L

## Chromatogram

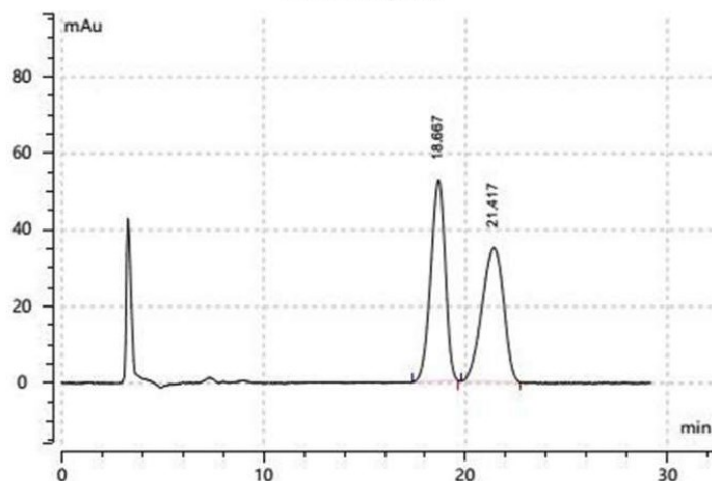

Peak Table

| Peak# | Rt (min) | A (mAu*s)  | W (min) | W <sub>1/2</sub> (min) | H (mAu) | A%     |
|-------|----------|------------|---------|------------------------|---------|--------|
| 1     | 18.667   | 2614.44046 | 1.283   | 0.778                  | 52.702  | 50.086 |
| 2     | 21.417   | 2605.42755 | 1.900   | 1.197                  | 35.012  | 49.914 |

# Sample Information

**9c**

OZ-H (DAICEL, 5 $\mu$ m, 4.6mm  $\phi$ ×250 mmL)

hexane/ isopropanol = 97: 3, 20°C, 220 nm, 1 mL/min, 20 $\mu$ L

## Chromatogram

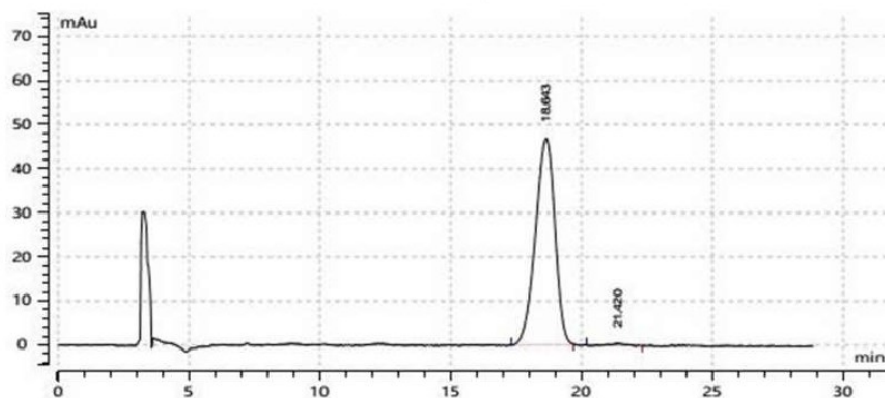

Peak Table

| Peak# | Rt (min) | A (mAu*s)  | W (min) | W <sub>1/2</sub> (min) | H (mAu) | A%     |
|-------|----------|------------|---------|------------------------|---------|--------|
| 1     | 18.643   | 2413.67451 | 1.335   | 0.805                  | 46.855  | 99.055 |
| 2     | 21.420   | 23.03367   | 1.221   | 0.936                  | 0.441   | 0.945  |

# Sample Information

**9d**

OZ-H (DAICEL, 5 $\mu$ m, 4.6mm  $\phi$ ×250 mmL)

hexane/ isopropanol = 97: 3, 20°C, 220 nm, 1 mL/min, 20 $\mu$ L

## Chromatogram

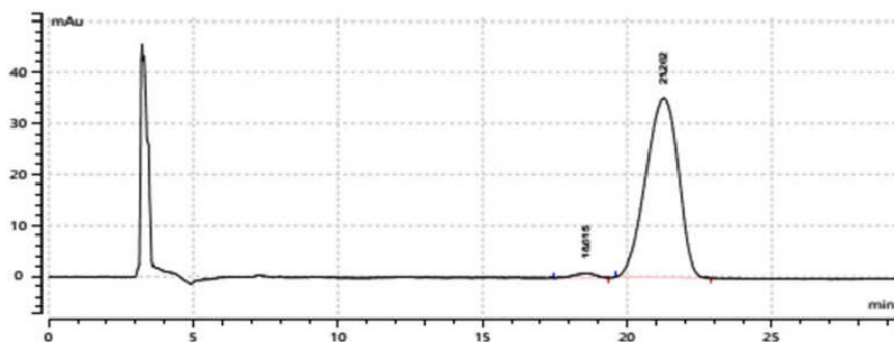

Peak Table

| Peak# | Rt (min) | A (mAu*s)  | W (min) | W <sub>1/2</sub> (min) | H (mAu) | A%     |
|-------|----------|------------|---------|------------------------|---------|--------|
| 1     | 18.615   | 47.97189   | 0.739   | 0.839                  | 0.948   | 1.725  |
| 2     | 21.262   | 2733.77338 | 2.006   | 1.259                  | 35.010  | 98.275 |

### Sample Information

#### (±)-11aa

IC (DAICEL, 5 $\mu$ m, 4.6mm  $\phi$ ×250 mmL)

hexane/ isopropanol = 80: 20, 20°C, 220 nm, 1 mL/min, 20 $\mu$ L

### Chromatogram

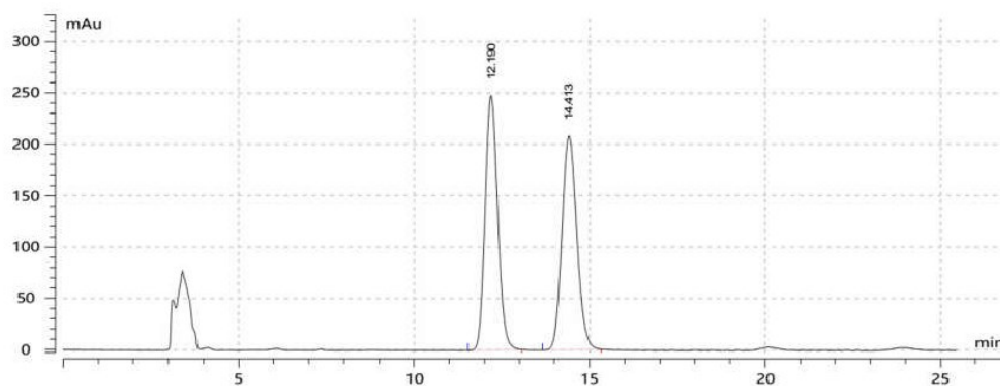

### Peak Table

| Peak# | Rt<br>(min) | A<br>(mAu*s) | W<br>(min) | W <sub>1/2</sub><br>(min) | H<br>(mAu) | A%     |
|-------|-------------|--------------|------------|---------------------------|------------|--------|
| 1     | 12.190      | 6176.85106   | 0.652      | 0.385                     | 248.084    | 50.069 |
| 2     | 14.413      | 6159.84264   | 0.775      | 0.459                     | 208.179    | 49.931 |

### Sample Information

#### 11aa

IC (DAICEL, 5 $\mu$ m, 4.6mm  $\phi$ ×250 mmL)

hexane/ isopropanol = 80: 20, 20°C, 220 nm, 1 mL/min, 20 $\mu$ L

### Chromatogram

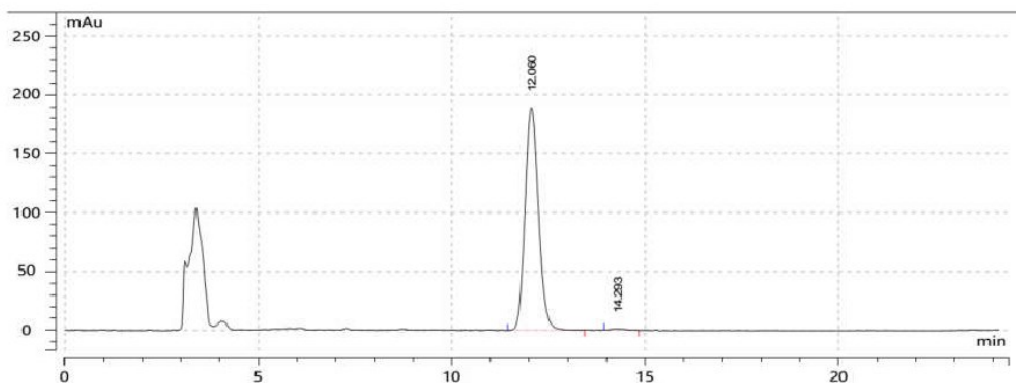

### Peak Table

| Peak# | Rt<br>(min) | A<br>(mAu*s) | W<br>(min) | W <sub>1/2</sub><br>(min) | H<br>(mAu) | A%     |
|-------|-------------|--------------|------------|---------------------------|------------|--------|
| 1     | 12.060      | 4591.53863   | 0.632      | 0.373                     | 189.539    | 99.461 |
| 2     | 14.293      | 24.90353     | 0.474      | 0.398                     | 1.001      | 0.539  |

# Sample Information

## 11b

IC (DAICEL, 5 $\mu$ m, 4.6mm  $\phi$ ×250 mmL)

hexane/ isopropanol = 80: 20, 20°C, 220 nm, 1 mL/min, 20 $\mu$ L

## Chromatogram

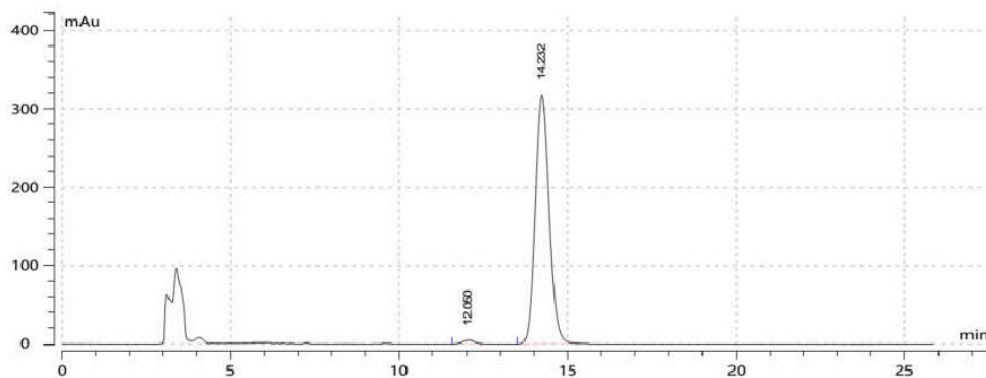

## Peak Table

| Peak# | Rt<br>(min) | A<br>(mAu*s) | W<br>(min) | W <sub>1/2</sub><br>(min) | H<br>(mAu) | A%     |
|-------|-------------|--------------|------------|---------------------------|------------|--------|
| 1     | 12.050      | 102.29614    | 0.549      | 0.357                     | 4.569      | 1.105  |
| 2     | 14.232      | 9159.00405   | 0.759      | 0.448                     | 316.739    | 98.895 |

# Sample Information

## (±)-11c

IC (DAICEL, 5 $\mu$ m, 4.6mm  $\phi$ ×250 mmL)

hexane/ isopropanol = 85: 15, 20°C, 220 nm, 0.7 mL/min, 20 $\mu$ L

## Chromatogram

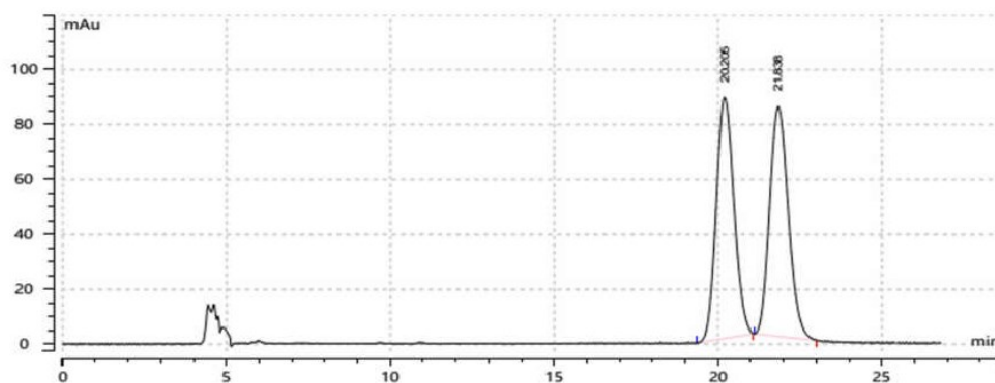

## Peak Table

| Peak# | Rt<br>(min) | A<br>(mAu*s) | W<br>(min) | W <sub>1/2</sub><br>(min) | H<br>(mAu) | A%     |
|-------|-------------|--------------|------------|---------------------------|------------|--------|
| 1     | 20.205      | 3320.10283   | 0.991      | 0.591                     | 87.907     | 49.977 |
| 2     | 21.838      | 3323.22374   | 1.034      | 0.618                     | 83.767     | 50.023 |

# Sample Information

## 11c

IC (DAICEL, 5 $\mu$ m, 4.6mm  $\phi$ ×250 mmL)

hexane/ isopropanol = 85: 15, 20°C, 220 nm, 0.7 mL/min, 20 $\mu$ L

## Chromatogram

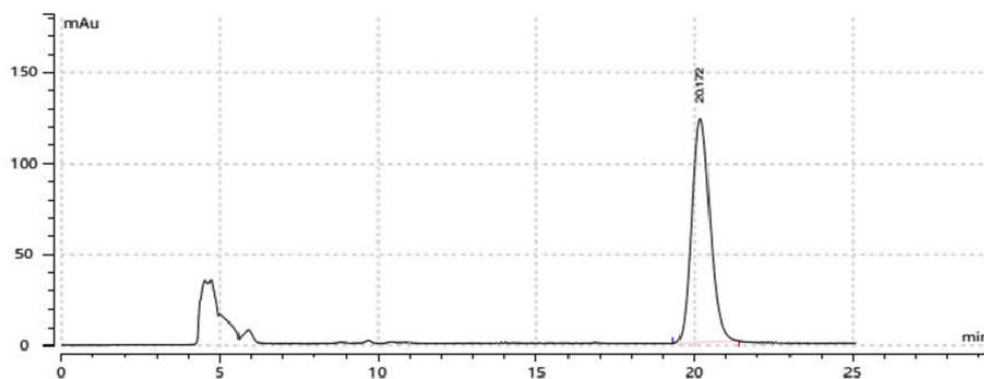

## Peak Table

| Peak# | Rt (min) | A (mAu*s)  | W (min) | W <sub>1/2</sub> (min) | H (mAu) | A%      |
|-------|----------|------------|---------|------------------------|---------|---------|
| 1     | 20.172   | 4945.22902 | 1.044   | 0.620                  | 123.038 | 100.000 |
| 2     |          |            |         |                        |         |         |

# Sample Information

## 11d

IC (DAICEL, 5 $\mu$ m, 4.6mm  $\phi$ ×250 mmL)

hexane/ isopropanol = 85: 15, 20°C, 220 nm, 0.7 mL/min, 20 $\mu$ L

## Chromatogram

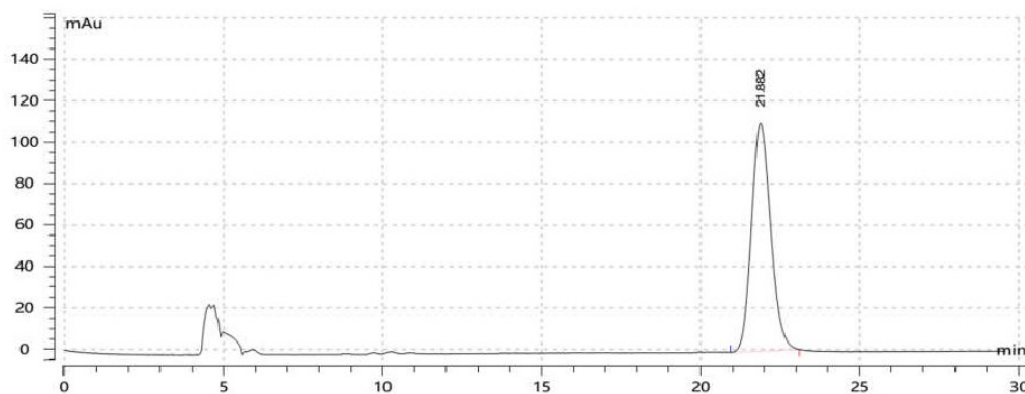

## Peak Table

| Peak# | Rt (min) | A (mAu*s)  | W (min) | W <sub>1/2</sub> (min) | H (mAu) | A%      |
|-------|----------|------------|---------|------------------------|---------|---------|
| 1     |          |            |         |                        |         |         |
| 2     | 21.882   | 4618.01370 | 1.087   | 0.648                  | 110.017 | 100.000 |

# Sample Information

## (±)-11ab

IC (DAICEL, 5 $\mu$ m, 4.6mm  $\phi$ ×250 mmL)

hexane/ isopropanol = 70: 30, 25°C, 210 nm, 1 mL/min, 20 $\mu$ L

## Chromatogram

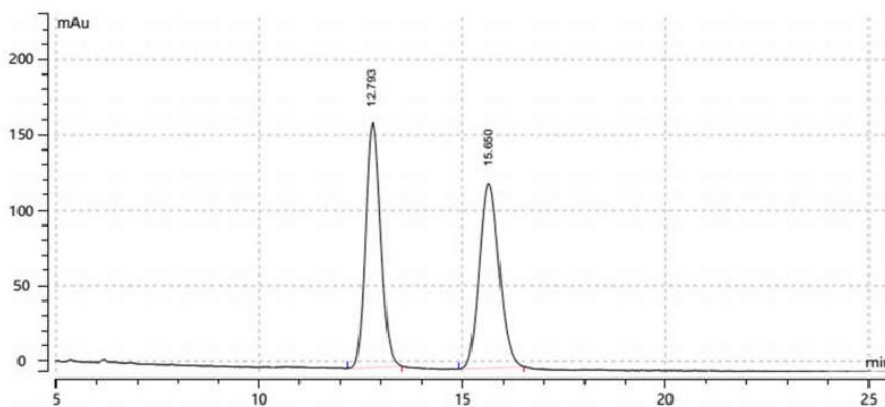

## Peak Table

| Peak# | Rt (min) | A (mAu*s)  | W (min) | W <sub>1/2</sub> (min) | H (mAu) | A%     |
|-------|----------|------------|---------|------------------------|---------|--------|
| 1     | 12.793   | 4232.29984 | 0.685   | 0.404                  | 162.248 | 50.253 |
| 2     | 15.650   | 4189.71569 | 0.887   | 0.530                  | 122.476 | 49.747 |

# Sample Information

## 11ab

IC (DAICEL, 5 $\mu$ m, 4.6mm  $\phi$ ×250 mmL)

hexane/ isopropanol = 70: 30, 25°C, 210 nm, 1 mL/min, 20 $\mu$ L

## Chromatogram

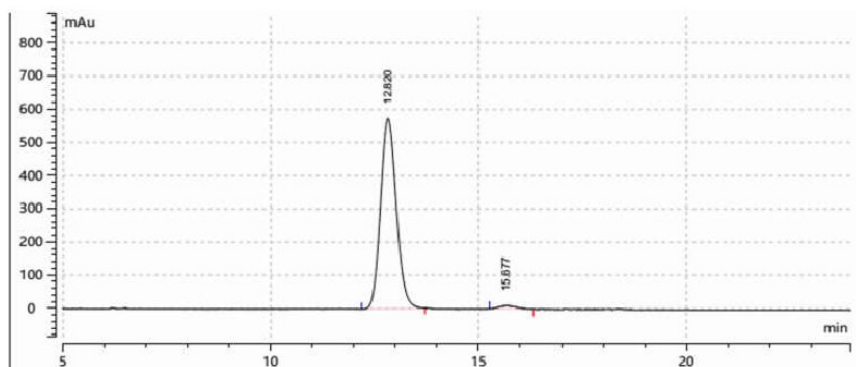

## Peak Table

| Peak# | Rt (min) | A (mAu*s)   | W (min) | W <sub>1/2</sub> (min) | H (mAu) | A%     |
|-------|----------|-------------|---------|------------------------|---------|--------|
| 1     | 12.820   | 15124.41427 | 0.689   | 0.407                  | 573.155 | 98.089 |
| 2     | 15.677   | 294.71667   | 0.684   | 0.479                  | 9.869   | 1.911  |

### Sample Information

#### (±)-11ac

IC (DAICEL, 5 $\mu$ m, 4.6mm  $\phi$ ×250 mmL)

hexane/ isopropanol = 70: 30, 25°C, 210 nm, 1 mL/min, 20 $\mu$ L

### Chromatogram

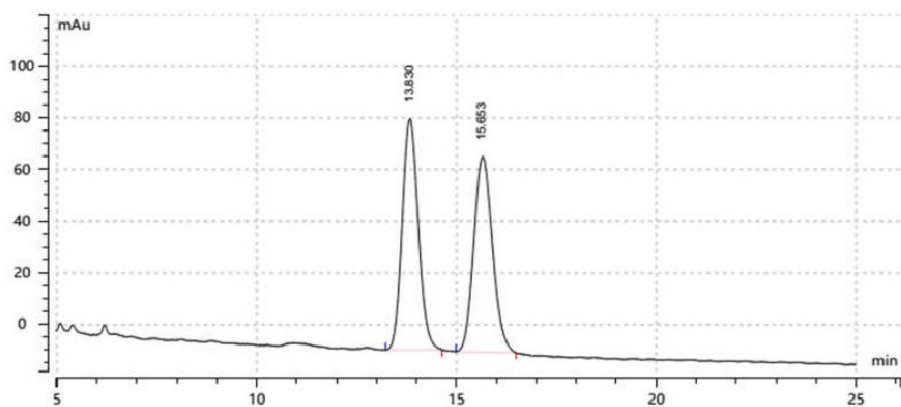

### Peak Table

| Peak# | Rt<br>(min) | A<br>(mAu*s) | W<br>(min) | W <sub>1/2</sub><br>(min) | H<br>(mAu) | A%     |
|-------|-------------|--------------|------------|---------------------------|------------|--------|
| 1     | 13.830      | 2508.34163   | 0.728      | 0.433                     | 89.546     | 50.411 |
| 2     | 15.653      | 2467.47632   | 0.838      | 0.506                     | 75.728     | 49.589 |

### Sample Information

#### 11ac

IC (DAICEL, 5 $\mu$ m, 4.6mm  $\phi$ ×250 mmL)

hexane/ isopropanol = 70: 30, 25°C, 210 nm, 1 mL/min, 20 $\mu$ L

### Chromatogram

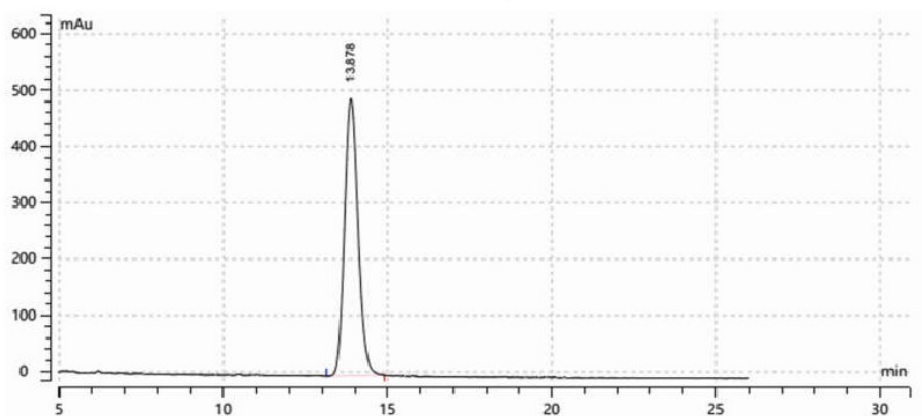

### Peak Table

| Peak# | Rt<br>(min) | A<br>(mAu*s) | W<br>(min) | W <sub>1/2</sub><br>(min) | H<br>(mAu) | A%      |
|-------|-------------|--------------|------------|---------------------------|------------|---------|
| 1     | 13.878      | 14110.66185  | 0.751      | 0.442                     | 492.553    | 100.000 |
| 2     |             |              |            |                           |            |         |

# Sample Information

## (±)-11ad

IC (DAICEL, 5μm, 4.6mm φ×250 mmL)

hexane/ isopropanol = 90: 10, 25°C, 220 nm, 1 mL/min, 20μL

## Chromatogram

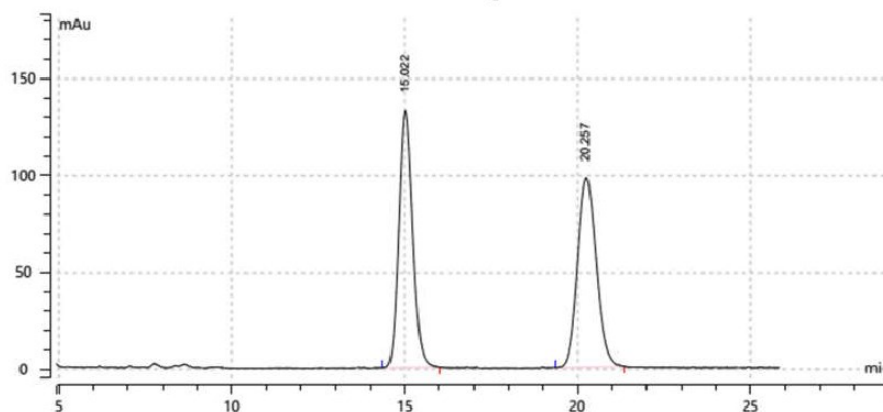

## Peak Table

| Peak# | Rt (min) | A (mAu*s)  | W (min) | W <sub>1/2</sub> (min) | H (mAu) | A%     |
|-------|----------|------------|---------|------------------------|---------|--------|
| 1     | 15.022   | 3695.81535 | 0.723   | 0.427                  | 132.982 | 50.045 |
| 2     | 20.257   | 3689.12194 | 0.984   | 0.585                  | 97.668  | 49.955 |

# Sample Information

## 11ad

IC (DAICEL, 5μm, 4.6mm φ×250 mmL)

hexane/ isopropanol = 90: 10, 25°C, 220 nm, 1 mL/min, 20μL

## Chromatogram

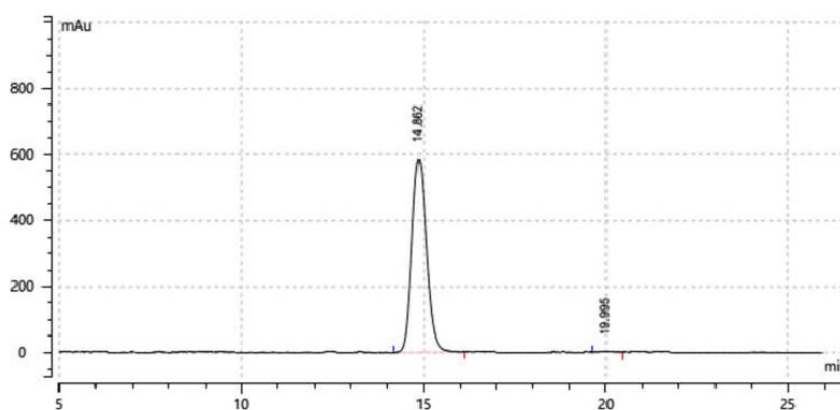

## Peak Table

| Peak# | Rt (min) | A (mAu*s)   | W (min) | W <sub>1/2</sub> (min) | H (mAu) | A%     |
|-------|----------|-------------|---------|------------------------|---------|--------|
| 1     | 14.862   | 16350.38215 | 0.729   | 0.431                  | 586.235 | 99.615 |
| 2     | 19.995   | 63.18269    | 0.661   | 0.474                  | 2.233   | 0.385  |

# Sample Information

## (±)-11ae

IC (DAICEL, 5μm, 4.6mm φ×250 mmL)

hexane/ isopropanol = 80: 20, 25°C, 220 nm, 1 mL/min, 20μL

## Chromatogram

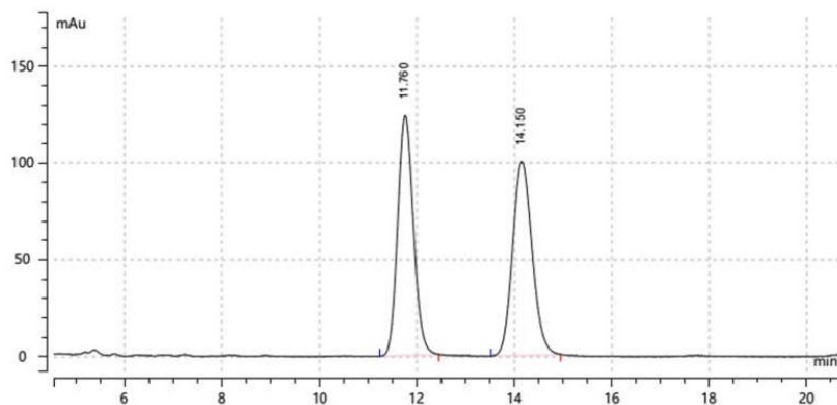

## Peak Table

| Peak# | Rt (min) | A (mAu*s)  | W (min) | W <sub>1/2</sub> (min) | H (mAu) | A%     |
|-------|----------|------------|---------|------------------------|---------|--------|
| 1     | 11.760   | 2780.84082 | 0.589   | 0.347                  | 123.986 | 49.950 |
| 2     | 14.150   | 2786.41100 | 0.729   | 0.432                  | 99.981  | 50.050 |

# Sample Information

## 11ae

IC (DAICEL, 5μm, 4.6mm φ×250 mmL)

hexane/ isopropanol = 80: 20, 25°C, 220 nm, 1 mL/min, 20μL

## Chromatogram

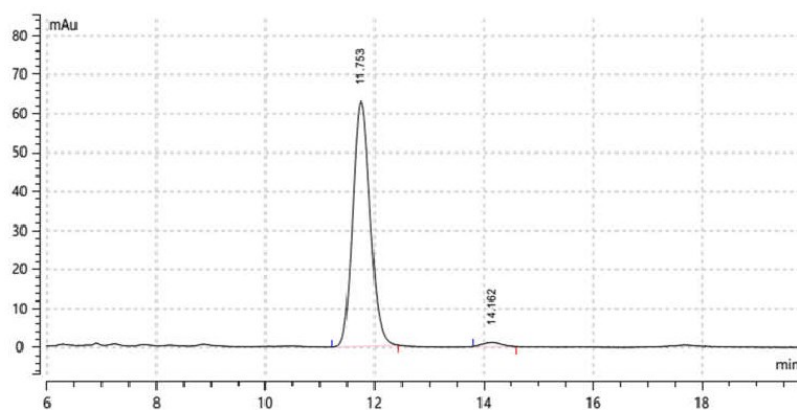

## Peak Table

| Peak# | Rt (min) | A (mAu*s)  | W (min) | W <sub>1/2</sub> (min) | H (mAu) | A%     |
|-------|----------|------------|---------|------------------------|---------|--------|
| 1     | 11.753   | 1405.66545 | 0.580   | 0.345                  | 62.873  | 98.147 |
| 2     | 14.162   | 26.53258   | 0.572   | 0.392                  | 1.124   | 1.853  |

### Sample Information

#### (±)-11af

IC (DAICEL, 5 $\mu$ m, 4.6mm  $\phi$ ×250 mmL)

hexane/ isopropanol = 80: 20, 25°C, 210 nm, 1 mL/min, 20 $\mu$ L

### Chromatogram

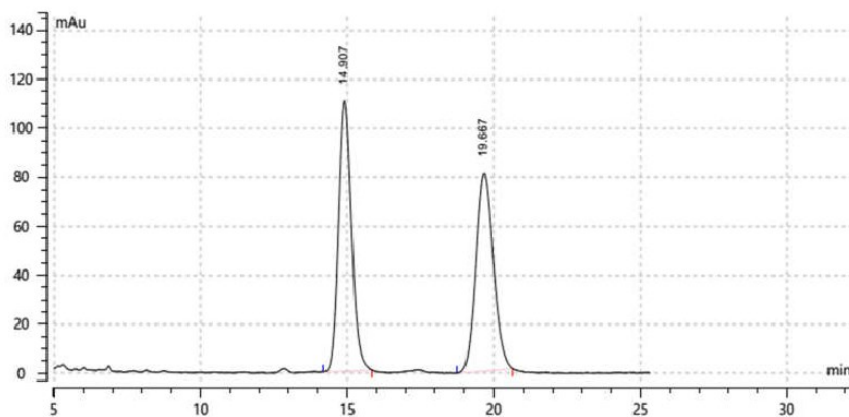

### Peak Table

| Peak# | Rt (min) | A (mAu*s)  | W (min) | W <sub>1/2</sub> (min) | H (mAu) | A%     |
|-------|----------|------------|---------|------------------------|---------|--------|
| 1     | 14.907   | 3444.62614 | 0.806   | 0.479                  | 110.506 | 50.508 |
| 2     | 19.667   | 3375.36660 | 1.079   | 0.649                  | 80.916  | 49.492 |

### Sample Information

#### 11af

IC (DAICEL, 5 $\mu$ m, 4.6mm  $\phi$ ×250 mmL)

hexane/ isopropanol = 80: 20, 25°C, 210 nm, 1 mL/min, 20 $\mu$ L

### Chromatogram

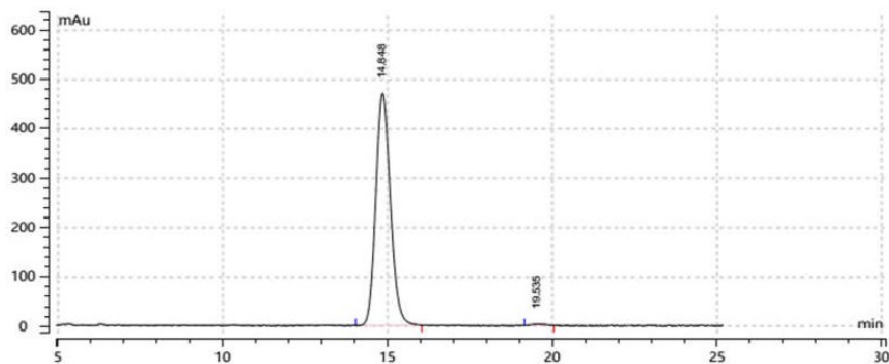

### Peak Table

| Peak# | Rt (min) | A (mAu*s)   | W (min) | W <sub>1/2</sub> (min) | H (mAu) | A%     |
|-------|----------|-------------|---------|------------------------|---------|--------|
| 1     | 14.848   | 14512.86705 | 0.802   | 0.474                  | 470.493 | 99.511 |
| 2     | 19.535   | 71.29664    | 0.705   | 0.537                  | 2.332   | 0.489  |

### Sample Information

**(±)-11ag**

IC (DAICEL, 5 $\mu$ m, 4.6mm  $\phi$ ×250 mmL)

hexane/ isopropanol = 90: 10, 25°C, 210 nm, 1 mL/min, 20 $\mu$ L

### Chromatogram

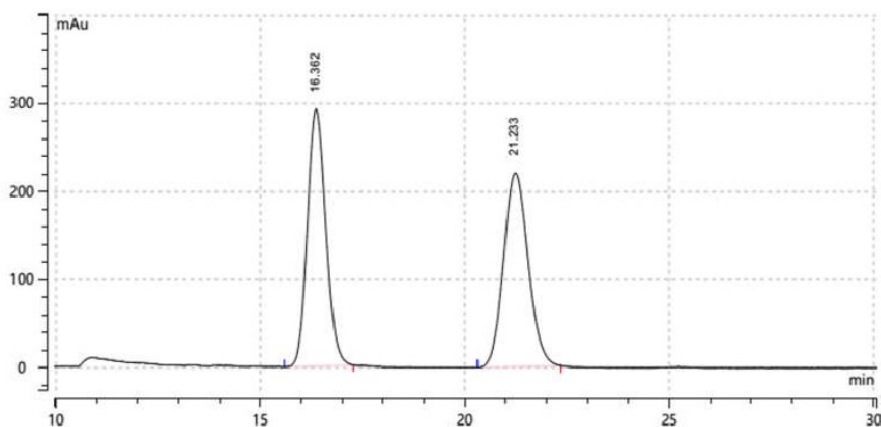

### Peak Table

| Peak# | Rt (min) | A (mAu*s)  | W (min) | W <sub>1/2</sub> (min) | H (mAu) | A%     |
|-------|----------|------------|---------|------------------------|---------|--------|
| 1     | 16.362   | 9180.35579 | 0.824   | 0.487                  | 292.073 | 50.015 |
| 2     | 21.233   | 9174.98793 | 1.085   | 0.644                  | 220.523 | 49.985 |

### Sample Information

**11ag**

IC (DAICEL, 5 $\mu$ m, 4.6mm  $\phi$ ×250 mmL)

hexane/ isopropanol = 90: 10, 25°C, 210 nm, 1 mL/min, 20 $\mu$ L

### Chromatogram

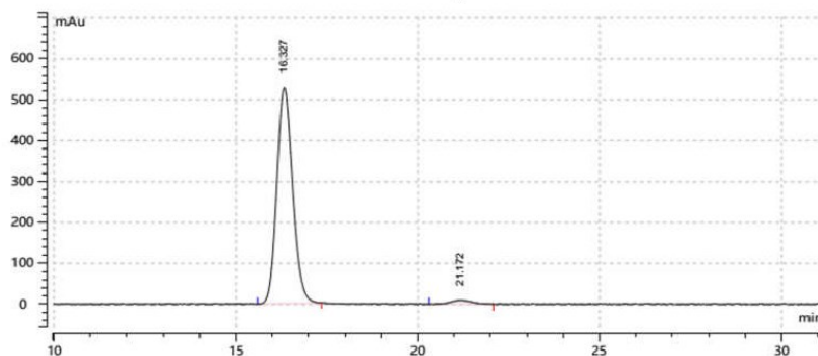

### Peak Table

| Peak# | Rt (min) | A (mAu*s)   | W (min) | W <sub>1/2</sub> (min) | H (mAu) | A%     |
|-------|----------|-------------|---------|------------------------|---------|--------|
| 1     | 16.327   | 16012.96102 | 0.795   | 0.468                  | 527.761 | 97.610 |
| 2     | 21.172   | 392.05509   | 0.949   | 0.637                  | 9.462   | 2.390  |

# Sample Information

## (±)-11ah

IC (DAICEL, 5μm, 4.6mm φ×250 mmL)

hexane/ isopropanol = 90: 10, 25°C, 210 nm, 0.6 mL/min, 20μL

## Chromatogram

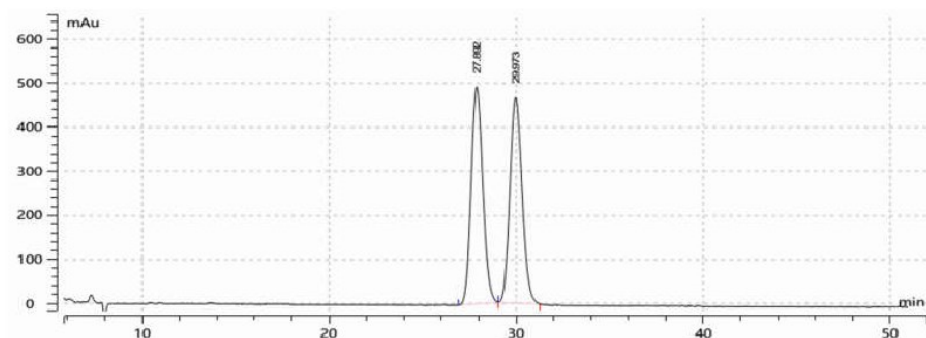

## Peak Table

| Peak# | Rt (min) | A (mAu*s)   | W (min) | W <sub>1/2</sub> (min) | H (mAu) | A%     |
|-------|----------|-------------|---------|------------------------|---------|--------|
| 1     | 27.892   | 21268.83800 | 1.133   | 0.670                  | 492.776 | 50.080 |
| 2     | 29.973   | 21200.58614 | 1.184   | 0.707                  | 466.531 | 49.920 |

# Sample Information

## 11ah

IC (DAICEL, 5μm, 4.6mm φ×250 mmL)

hexane/ isopropanol = 90: 10, 25°C, 210 nm, 0.6 mL/min, 20μL

## Chromatogram

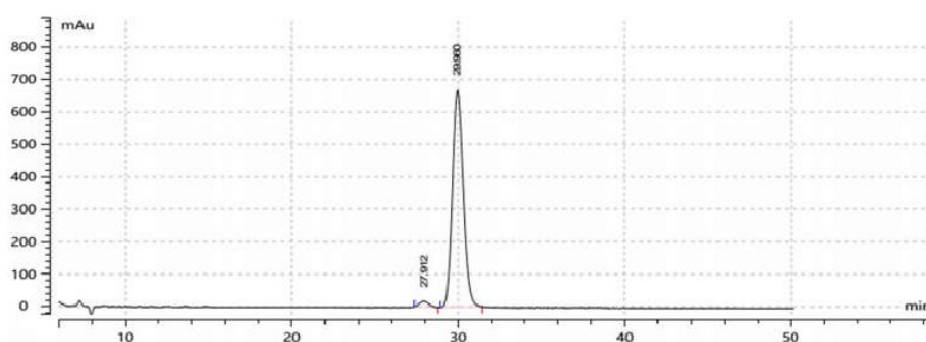

## Peak Table

| Peak# | Rt (min) | A (mAu*s)   | W (min) | W <sub>1/2</sub> (min) | H (mAu) | A%     |
|-------|----------|-------------|---------|------------------------|---------|--------|
| 1     | 27.912   | 696.59173   | 0.921   | 0.627                  | 17.906  | 2.212  |
| 2     | 29.960   | 30791.64559 | 1.199   | 0.712                  | 669.894 | 97.788 |

## Sample Information

### 11ah (Gram-scale)

IC (DAICEL, 5 $\mu$ m, 4.6mm  $\phi$ ×250 mmL)

hexane/ isopropanol = 90: 10, 25°C, 210 nm, 0.6 mL/min, 20 $\mu$ L

## Chromatogram

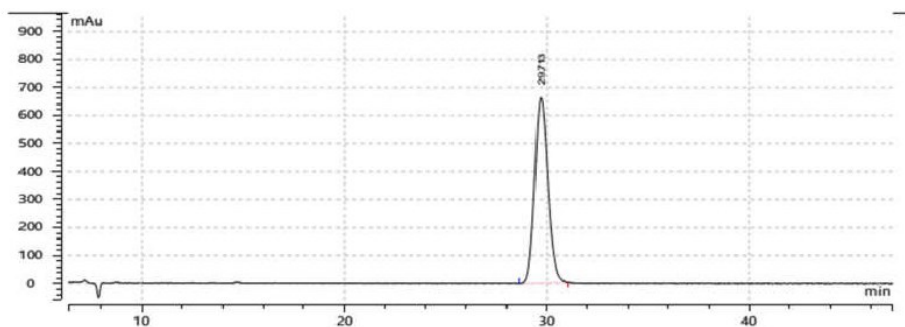

Peak Table

| Peak# | Rt<br>(min) | A<br>(mAu*s) | W<br>(min) | W <sub>1/2</sub><br>(min) | H<br>(mAu) | A%      |
|-------|-------------|--------------|------------|---------------------------|------------|---------|
| 1     | 29.713      | 30263.79797  | 1.190      | 0.708                     | 663.094    | 100.000 |
| 2     |             |              |            |                           |            |         |

# Sample Information

**(±)-11ai**

IC (DAICEL, 5μm, 4.6mm φ×250 mmL)

hexane/ isopropanol = 95: 5, 25°C, 210 nm, 1 mL/min, 20μL

## Chromatogram

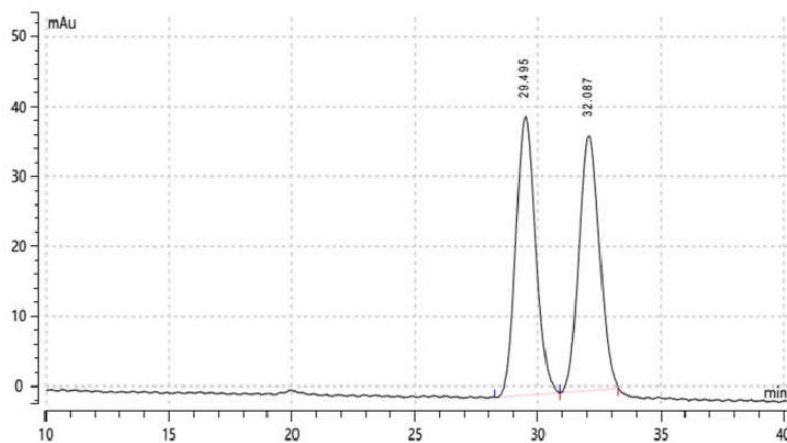

## Peak Table

| Peak# | Rt (min) | A (mAu*s)  | W (min) | W <sub>1/2</sub> (min) | H (mAu) | A%     |
|-------|----------|------------|---------|------------------------|---------|--------|
| 1     | 29.495   | 2219.44961 | 1.338   | 0.865                  | 39.887  | 51.061 |
| 2     | 32.087   | 2127.24955 | 1.345   | 0.923                  | 36.550  | 48.939 |

# Sample Information

**11ai**

IC (DAICEL, 5μm, 4.6mm φ×250 mmL)

hexane/ isopropanol = 95: 5, 25°C, 210 nm, 1 mL/min, 20μL

## Chromatogram

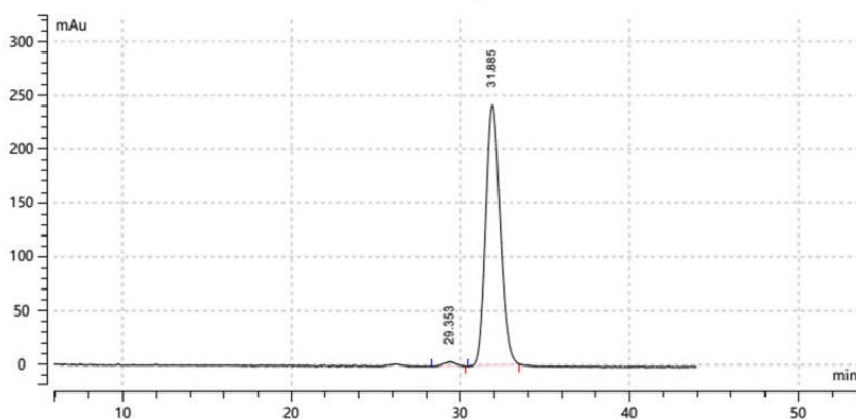

## Peak Table

| Peak# | Rt (min) | A (mAu*s)   | W (min) | W <sub>1/2</sub> (min) | H (mAu) | A%     |
|-------|----------|-------------|---------|------------------------|---------|--------|
| 1     | 29.353   | 201.32995   | 0.968   | 0.845                  | 3.804   | 1.377  |
| 2     | 31.885   | 14419.47318 | 1.550   | 0.927                  | 241.563 | 98.623 |

# Sample Information

**(±)-11aj**

IC (DAICEL, 5μm, 4.6mm φ×250 mmL)

hexane/ isopropanol = 90: 10, 25°C, 220 nm, 1 mL/min, 20μL

## Chromatogram

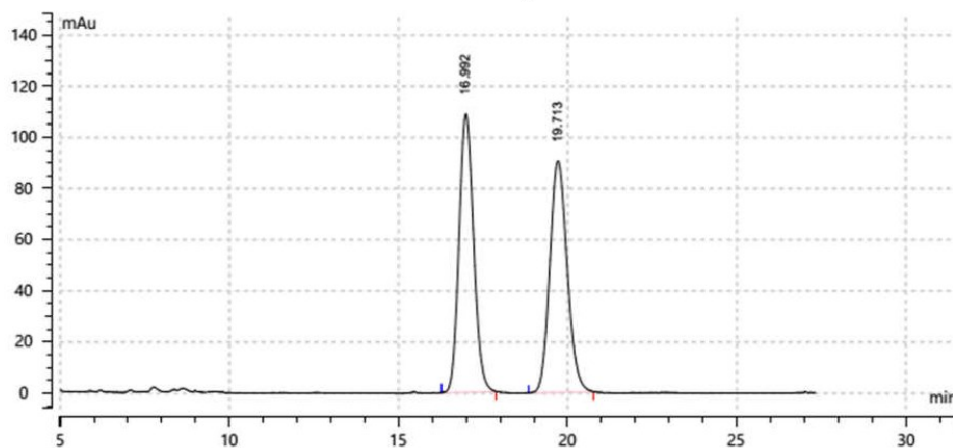

## Peak Table

| Peak# | Rt (min) | A (mAu*s)  | W (min) | W <sub>1/2</sub> (min) | H (mAu) | A%     |
|-------|----------|------------|---------|------------------------|---------|--------|
| 1     | 16.992   | 3251.40872 | 0.778   | 0.462                  | 108.951 | 50.029 |
| 2     | 19.713   | 3247.61003 | 0.933   | 0.555                  | 90.526  | 49.971 |

# Sample Information

**11aj**

IC (DAICEL, 5μm, 4.6mm φ×250 mmL)

hexane/ isopropanol = 90: 10, 25°C, 220 nm, 1 mL/min, 20μL

## Chromatogram

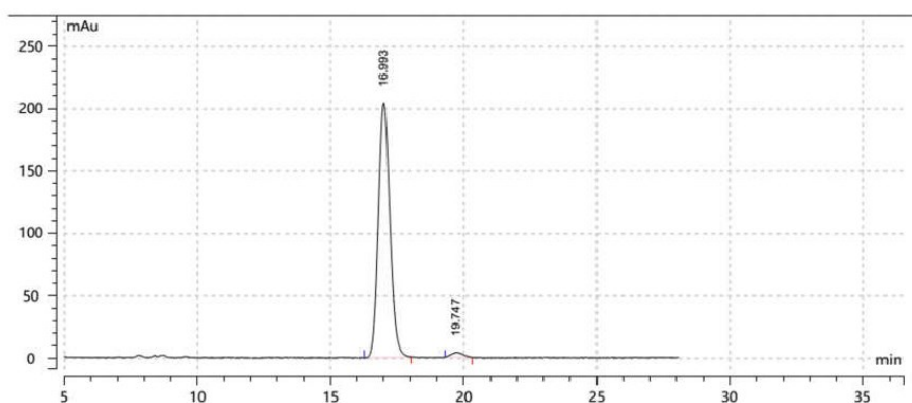

## Peak Table

| Peak# | Rt (min) | A (mAu*s)  | W (min) | W <sub>1/2</sub> (min) | H (mAu) | A%     |
|-------|----------|------------|---------|------------------------|---------|--------|
| 1     | 16.993   | 6159.06957 | 0.787   | 0.465                  | 204.409 | 98.176 |
| 2     | 19.747   | 114.40679  | 0.765   | 0.509                  | 3.654   | 1.824  |

# Sample Information

**(±)-11ak**

IC (DAICEL, 5μm, 4.6mm φ×250 mmL)

hexane/ isopropanol = 90: 10, 25°C, 210 nm, 0.7 mL/min, 20μL

## Chromatogram

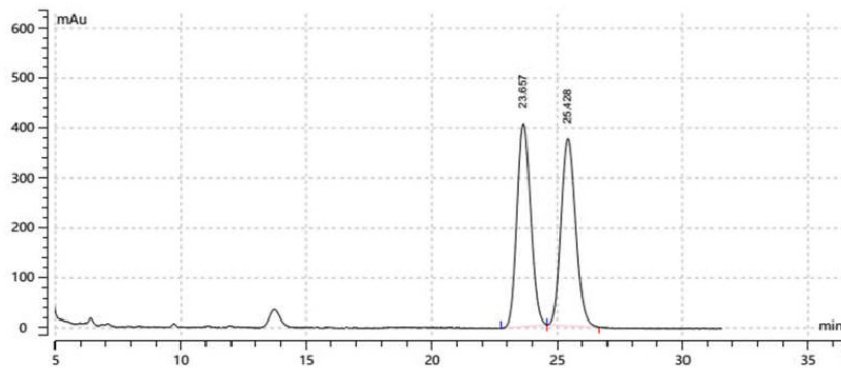

## Peak Table

| Peak# | Rt (min) | A (mAu*s)   | W (min) | W <sub>1/2</sub> (min) | H (mAu) | A%     |
|-------|----------|-------------|---------|------------------------|---------|--------|
| 1     | 23.657   | 15315.99698 | 0.990   | 0.589                  | 406.423 | 49.967 |
| 2     | 25.428   | 15335.94947 | 1.079   | 0.639                  | 374.025 | 50.033 |

# Sample Information

**11ak**

IC (DAICEL, 5μm, 4.6mm φ×250 mmL)

hexane/ isopropanol = 90: 10, 25°C, 210 nm, 0.7 mL/min, 20μL

## Chromatogram

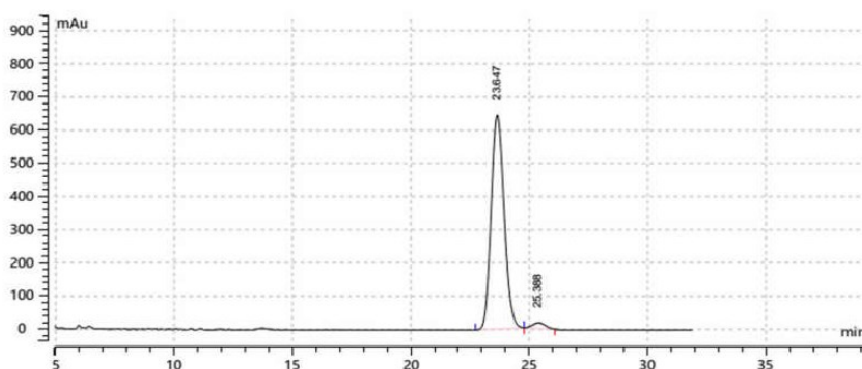

## Peak Table

| Peak# | Rt (min) | A (mAu*s)   | W (min) | W <sub>1/2</sub> (min) | H (mAu) | A%     |
|-------|----------|-------------|---------|------------------------|---------|--------|
| 1     | 23.647   | 24658.23035 | 1.001   | 0.596                  | 645.734 | 97.535 |
| 2     | 25.388   | 623.18974   | 0.918   | 0.609                  | 16.739  | 2.465  |

# Sample Information

**(±)-11al**

IC (DAICEL, 5 $\mu$ m, 4.6mm  $\phi$ ×250 mmL)

hexane/ isopropanol = 90: 10, 25°C, 210 nm, 1 mL/min, 20 $\mu$ L

## Chromatogram

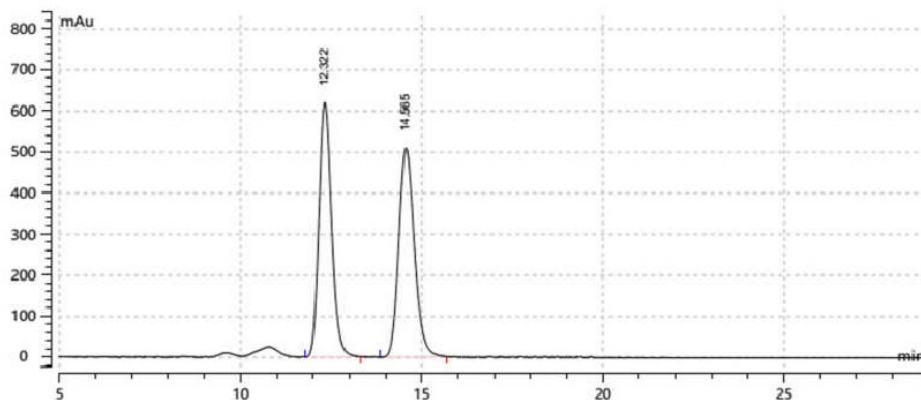

## Peak Table

| Peak# | Rt (min) | A (mAu*s)   | W (min) | W <sub>1/2</sub> (min) | H (mAu) | A%     |
|-------|----------|-------------|---------|------------------------|---------|--------|
| 1     | 12.322   | 15140.02076 | 0.635   | 0.373                  | 620.220 | 49.943 |
| 2     | 14.565   | 15174.63340 | 0.774   | 0.455                  | 509.223 | 50.057 |

# Sample Information

**11al**

IC (DAICEL, 5 $\mu$ m, 4.6mm  $\phi$ ×250 mmL)

hexane/ isopropanol = 90: 10, 25°C, 210 nm, 1 mL/min, 20 $\mu$ L

## Chromatogram

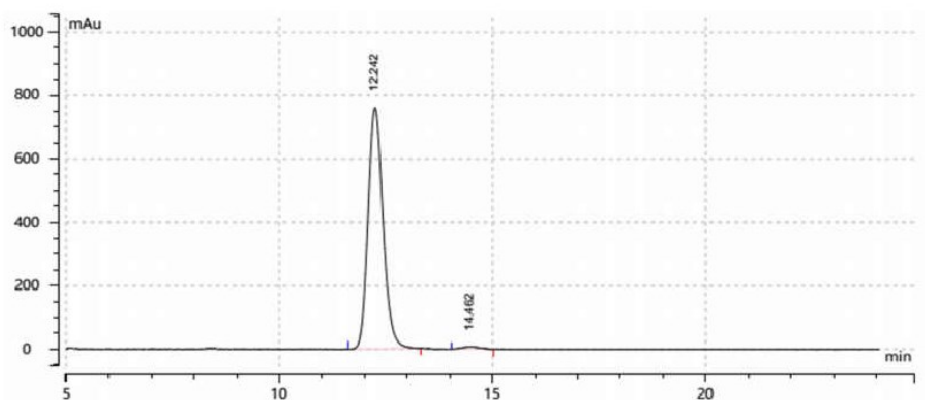

## Peak Table

| Peak# | Rt (min) | A (mAu*s)   | W (min) | W <sub>1/2</sub> (min) | H (mAu) | A%     |
|-------|----------|-------------|---------|------------------------|---------|--------|
| 1     | 12.242   | 18636.33262 | 0.635   | 0.373                  | 761.912 | 98.946 |
| 2     | 14.462   | 198.47831   | 0.587   | 0.431                  | 7.313   | 1.054  |

# Sample Information

**(±)-11am**

IC (DAICEL, 5μm, 4.6mm φ×250 mmL)

hexane/ isopropanol = 90: 10, 25°C, 210 nm, 0.7 mL/min, 20μL

## Chromatogram

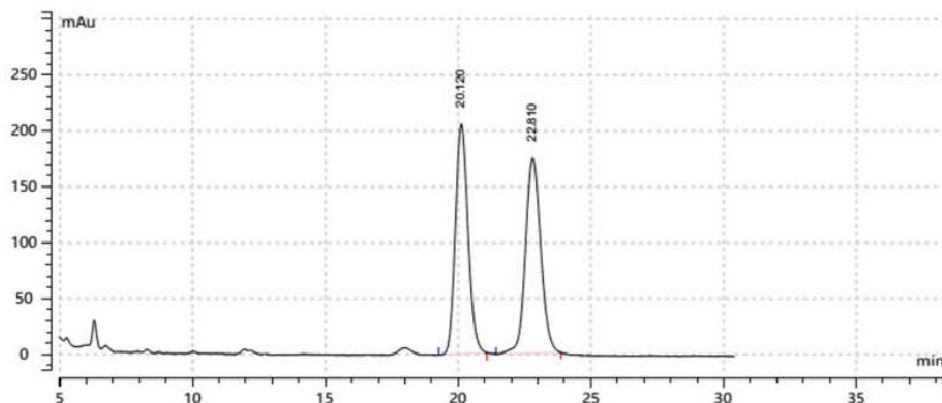

## Peak Table

| Peak# | Rt<br>(min) | A<br>(mAu*s) | W<br>(min) | W <sub>1/2</sub><br>(min) | H<br>(mAu) | A%     |
|-------|-------------|--------------|------------|---------------------------|------------|--------|
| 1     | 20.120      | 6849.34025   | 0.868      | 0.514                     | 205.766    | 49.696 |
| 2     | 22.810      | 6933.24522   | 1.016      | 0.603                     | 174.686    | 50.304 |

# Sample Information

**11am**

IC (DAICEL, 5μm, 4.6mm φ×250 mmL)

hexane/ isopropanol = 90: 10, 25°C, 210 nm, 0.7 mL/min, 20μL

## Chromatogram

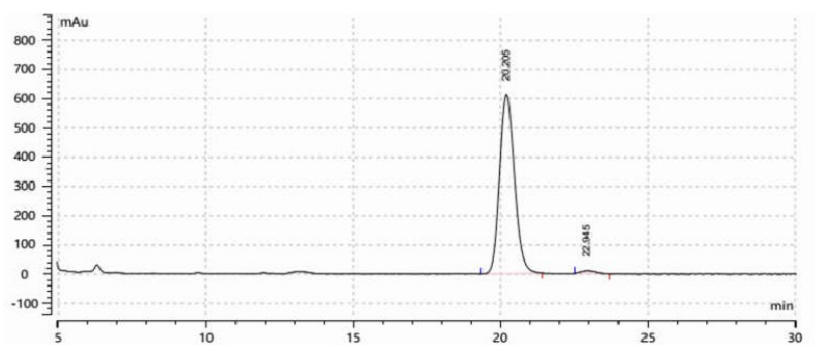

## Peak Table

| Peak# | Rt<br>(min) | A<br>(mAu*s) | W<br>(min) | W <sub>1/2</sub><br>(min) | H<br>(mAu) | A%     |
|-------|-------------|--------------|------------|---------------------------|------------|--------|
| 1     | 20.205      | 21384.02187  | 0.912      | 0.541                     | 611.996    | 98.594 |
| 2     | 22.945      | 304.96892    | 0.800 6    | 0.546                     | 9.023      | 1.40   |

# Sample Information

**(±)-11an**

IC (DAICEL, 5 $\mu$ m, 4.6mm  $\phi$ ×250 mmL)

hexane/ isopropanol = 80: 20, 25°C, 210 nm, 1 mL/min, 20 $\mu$ L

## Chromatogram

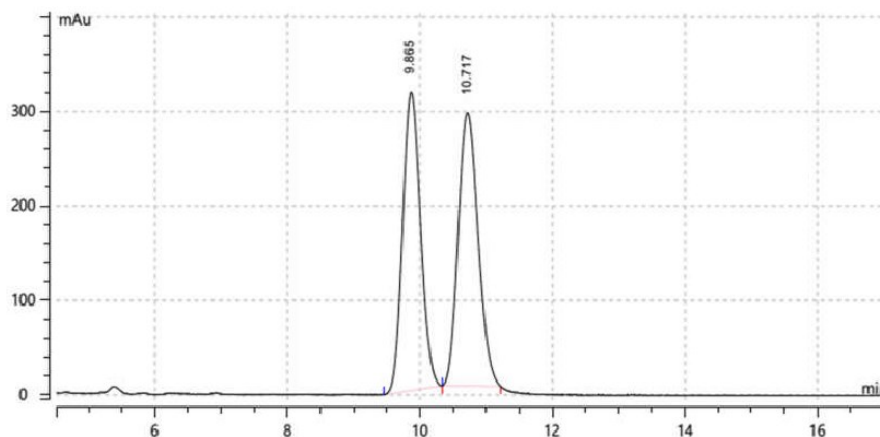

## Peak Table

| Peak# | Rt (min) | A (mAu*s)  | W (min) | W <sub>1/2</sub> (min) | H (mAu) | A%     |
|-------|----------|------------|---------|------------------------|---------|--------|
| 1     | 9.865    | 5908.62473 | 0.494   | 0.293                  | 315.642 | 49.391 |
| 2     | 10.717   | 6054.28361 | 0.556   | 0.328                  | 289.376 | 50.609 |

# Sample Information

**11an**

IC (DAICEL, 5 $\mu$ m, 4.6mm  $\phi$ ×250 mmL)

hexane/ isopropanol = 80: 20, 25°C, 210 nm, 1 mL/min, 20 $\mu$ L

## Chromatogram

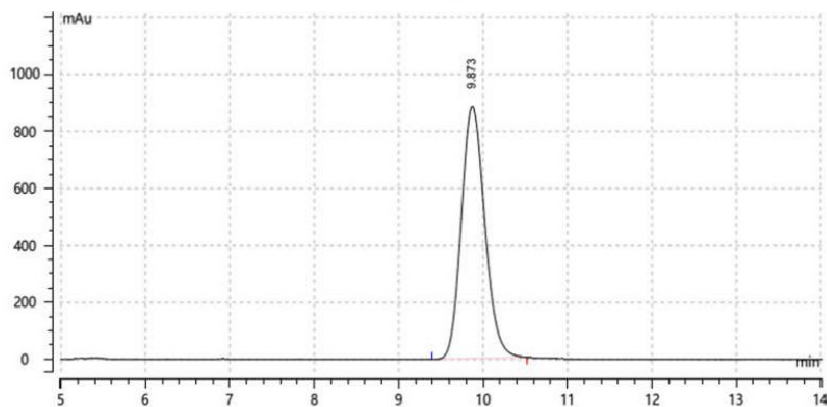

## Peak Table

| Peak# | Rt (min) | A (mAu*s)   | W (min) | W <sub>1/2</sub> (min) | H (mAu) | A%      |
|-------|----------|-------------|---------|------------------------|---------|---------|
| 1     | 9.873    | 17093.02622 | 0.507   | 0.299                  | 885.321 | 100.000 |
| 2     |          |             |         |                        |         |         |

# Sample Information

**(±)-11ao**

IC (DAICEL, 5μm, 4.6mm φ×250 mmL)

hexane/ isopropanol = 60: 40, 25°C, 210 nm, 1 mL/min, 20μL

## Chromatogram

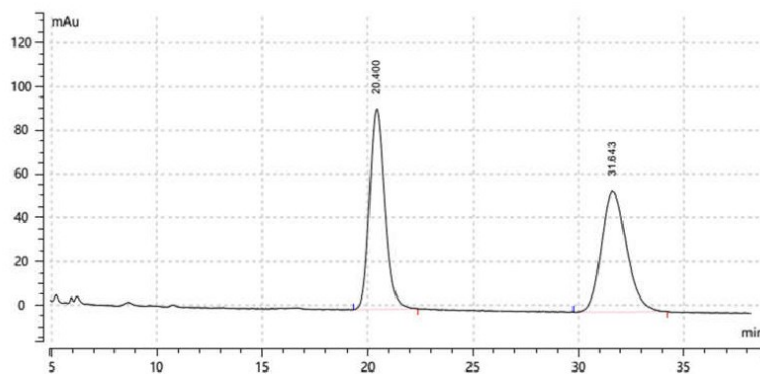

## Peak Table

| Peak# | Rt (min) | A (mAu*s)  | W (min) | W <sub>1/2</sub> (min) | H (mAu) | A%     |
|-------|----------|------------|---------|------------------------|---------|--------|
| 1     | 20.400   | 4682.75068 | 1.278   | 0.777                  | 91.684  | 50.524 |
| 2     | 31.643   | 4585.54952 | 1.921   | 1.276                  | 55.271  | 49.476 |

# Sample Information

**11ao**

IC (DAICEL, 5μm, 4.6mm φ×250 mmL)

hexane/ isopropanol = 60: 40, 25°C, 210 nm, 1 mL/min, 20μL

## Chromatogram

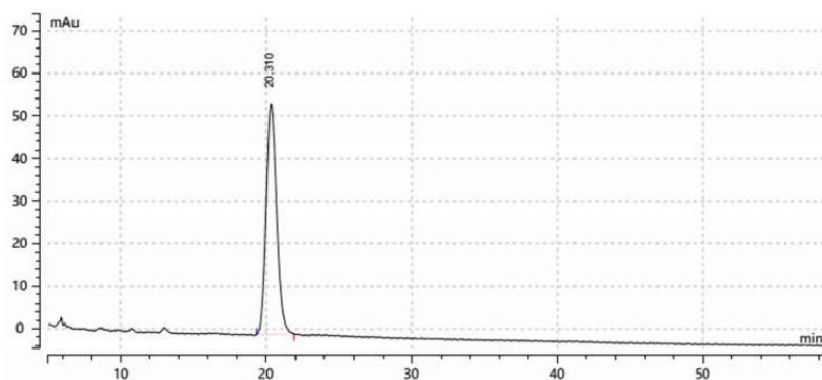

## Peak Table

| Peak# | Rt (min) | A (mAu*s)  | W (min) | W <sub>1/2</sub> (min) | H (mAu) | A%      |
|-------|----------|------------|---------|------------------------|---------|---------|
| 1     | 20.310   | 2696.52909 | 1.237   | 0.765                  | 54.249  | 100.000 |
| 2     |          |            |         |                        |         |         |

# Sample Information

**(±)-11ap**

IC (DAICEL, 5 $\mu$ m, 4.6mm  $\phi$ ×250 mmL)

hexane/ isopropanol = 60: 40, 25°C, 210 nm, 1 mL/min, 20 $\mu$ L

## Chromatogram

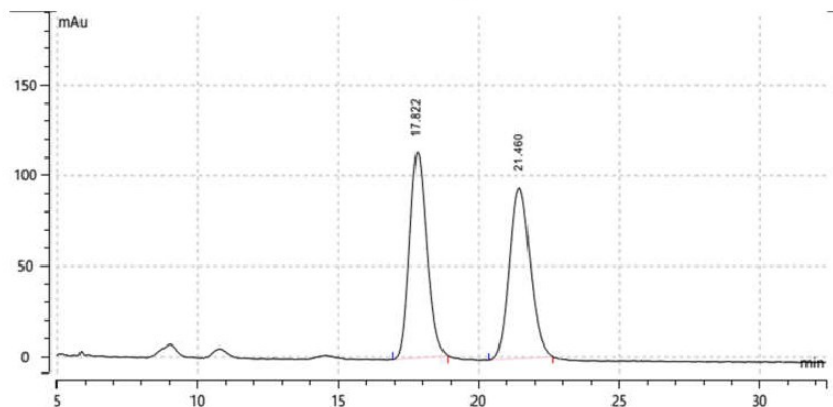

## Peak Table

| Peak# | Rt<br>(min) | A<br>(mAu*s) | W<br>(min) | W <sub>1/2</sub><br>(min) | H<br>(mAu) | A%     |
|-------|-------------|--------------|------------|---------------------------|------------|--------|
| 1     | 17.822      | 4851.81959   | 1.109      | 0.665                     | 113.388    | 49.994 |
| 2     | 21.460      | 4853.00787   | 1.304      | 0.802                     | 94.245     | 50.006 |

# Sample Information

**11ap**

IC (DAICEL, 5 $\mu$ m, 4.6mm  $\phi$ ×250 mmL)

hexane/ isopropanol = 60: 40, 25°C, 210 nm, 1 mL/min, 20 $\mu$ L

## Chromatogram

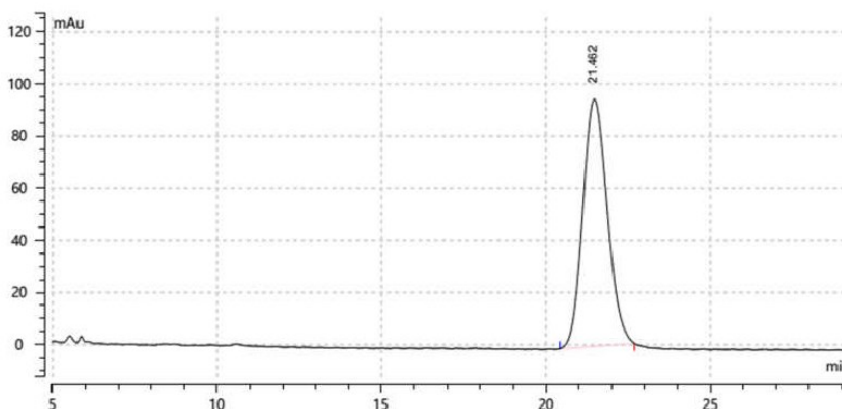

## Peak Table

| Peak# | Rt<br>(min) | A<br>(mAu*s) | W<br>(min) | W <sub>1/2</sub><br>(min) | H<br>(mAu) | A%      |
|-------|-------------|--------------|------------|---------------------------|------------|---------|
| 1     | 21.462      | 4900.56017   | 1.314      | 0.805                     | 94.822     | 100.000 |
| 2     |             |              |            |                           |            |         |

# Sample Information

## (±)-11aq

IC (DAICEL, 5μm, 4.6mm φ×250 mmL)

hexane/ ethyl acetate = 50: 50, 25°C, 254 nm, 0.5 mL/min, 20μL

### Chromatogram

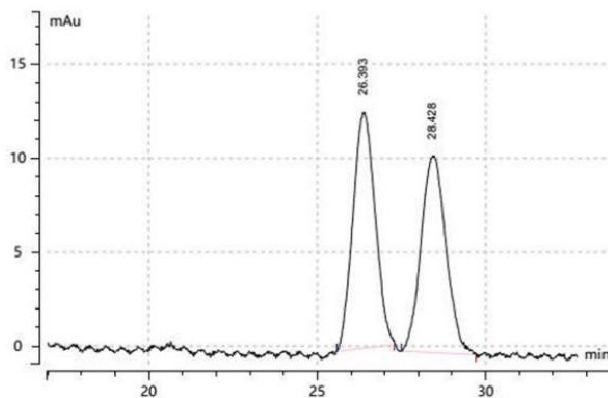

### Peak Table

| Peak# | Rt (min) | A (mAu*s) | W (min) | W <sub>1/2</sub> (min) | H (mAu) | A%     |
|-------|----------|-----------|---------|------------------------|---------|--------|
| 1     | 26.393   | 573.81739 | 1.136   | 0.729                  | 12.598  | 51.546 |
| 2     | 28.428   | 539.40163 | 1.115   | 0.797                  | 10.489  | 48.454 |

# Sample Information

## 11aq

IC (DAICEL, 5μm, 4.6mm φ×250 mmL)

hexane/ ethyl acetate = 50: 50, 25°C, 254 nm, 0.5 mL/min, 20μL

### Chromatogram

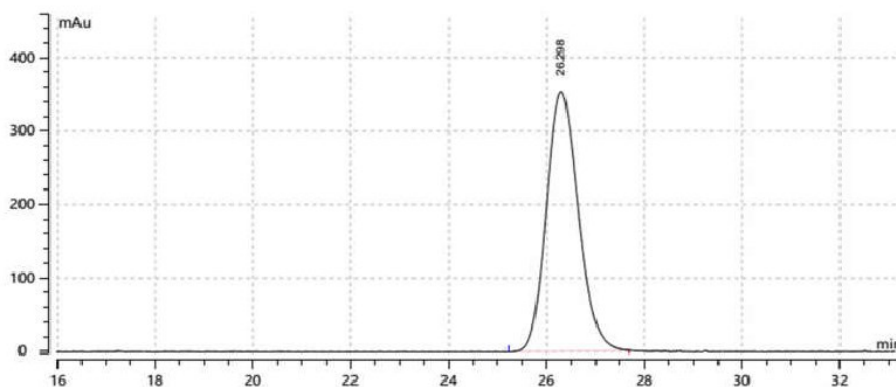

### Peak Table

| Peak# | Rt (min) | A (mAu*s)   | W (min) | W <sub>1/2</sub> (min) | H (mAu) | A%      |
|-------|----------|-------------|---------|------------------------|---------|---------|
| 1     | 26.298   | 16059.74770 | 1.187   | 0.703                  | 353.209 | 100.000 |
| 2     |          |             |         |                        |         |         |

## References

1. F.-Y. Du, Q.-F. Zhou, Y. Fu, H.-Q. Zhao, Y.-G. Chen and G.-L. Chen, *New J. Chem.*, 2019, **43**, 6549-6554.
2. S.-H. Chen, Z.-Z. Ding, G.-L. Gong, X.-B. Yan, W. Huang, F. Guo, B.-L. Duan, R.-L. Gao, P.-F. Zhou, X.-H. Lu and G.-M. Dong, New Drug Research and Development Co., Ltd. of North China Pharmaceutical Corporation, *CN Pat.*, 105503903B, 2019.
3. S. K. Sythana, S. R. Naramreddy, S. Kavitate, C. V. Kumar and P. R. Bhagat, *Org. Process Res. Dev.* 2014, **18**, 912-918.
